# Supplementary material for: Stereoselectivity of A-ring contraction for 3-oxotriterpenoids
Source: Royal Society of Chemistry journal article supplement (doi:10.1039/c3ra42929f), 2013-01-01
Supplement: c3ra42929f.pdf [file c3ra42929f.pdf]

## Stereoselectivity of A-ring contraction for 3-oxotriterpenoids

Alexey D. Kacharov,<sup>a</sup> Sergiy V. Yemets,<sup>a</sup> Victor N. Nemykin,<sup>b</sup> Liliya M. Kacharova,<sup>a</sup> Andrey A. Fokin<sup>c</sup> and Pavel A. Krasutsky\*<sup>a</sup>

<sup>a</sup> Natural Resources Research Institute, University of Minnesota, 5013 Miller Trunk Highway, Duluth, MN 55811, United States; E-mail: pkrasuts@nrri.umn.edu

<sup>b</sup> Department of Chemistry and Biochemistry, University of Minnesota Duluth, 1039 University Drive, Duluth, MN 55812, United States

<sup>c</sup> Department of Organic Chemistry, Kiev Polytechnic Institute, pr. Pobedy 37, 03056 Kiev, Ukraine

### Supplementary Information

|                                                                                      |    |
|--------------------------------------------------------------------------------------|----|
| 1. Experimental and NMR spectra.....                                                 | 2  |
| 2. X-ray structural determination.....                                               | 73 |
| 3. XYZ-coordinates and absolute energies of B3PW91/6-31G(d,p) optimized species..... | 75 |

## 1. Experimental

NMR spectra (300 or 500 MHz  $^1\text{H}$  NMR and 75 or 125 MHz  $^{13}\text{C}$  NMR) were recorded using Varian Unity Inova 300 and Varian 500 with Auto-Tuner.  $^1\text{H}$  and  $^{13}\text{C}$  NMR chemical shifts are reported in parts per million (ppm) and referenced to tetramethylsilane as internal standard. GC/MS spectra were recorded using Hewlett-Packard 5890 gas chromatograph (Alltech AT<sup>TM</sup>-35 column, (35% phenyl)-65% methylpolysiloxane, length 10 m, id 0.18 mm,  $d_f$  0.20  $\mu\text{m}$ ) and Hewlett-Packard 5970A mass selection detector. CD spectra were recorded using Olis DSM 17 CD digital subtractive method circular dichrometer with a Cary prism and grating monochromator. Optical rotations were measured using Jasco P-1010 polarimeter.

### 2-Hydroxylup-1,20-dien-3-one (6)

Lupenone (**1**) (0.60 g, 1.41 mmol) was mixed with potassium *tert*-butoxide (0.60 g, 5.35 mmol) in *tert*-butanol (25 ml). Suspension was stirred at 40 °C. Dry oxygen was constantly introduced in for 55 min. 1 N hydrochloric acid (100 ml) was added to the reaction solution. Precipitate was filtered, washed with water (3x50 ml) and hot water (70 °C, 3x30 ml) and dried in vacuum. Titled compound (**6**) was obtained as white solid (0.58 g, 94%). The product was purified on silica (hexane/ethyl ether, 95/5), m.p. 151-154 °C.  $^1\text{H}$  NMR (300 MHz,  $\text{CDCl}_3$ ):  $\delta$  6.46 (s, 1H), 5.91 (s, 1H), 4.72 (s, 1H), 4.61 (s, 1H), 2.41 (m, 1H), 2.02-0.82 (m, 41H).  $^{13}\text{C}$  NMR (75 MHz,  $\text{CDCl}_3$ ):  $\delta$  201.48, 150.92, 144.10, 129.23, 109.78, 54.21, 48.40, 48.17, 48.16, 45.85, 44.20, 43.41, 43.25, 41.92, 40.21, 38.88, 35.75, 34.16, 30.03, 27.58, 27.35, 25.23, 21.85, 21.41, 20.41, 19.53, 18.99, 18.29, 16.72, 14.68. HRMS (ESI):  $m/z$  461.3389 ( $[\text{M}+\text{Na}^+]$   $\text{C}_{30}\text{H}_{46}\text{NaO}_2^+$  requires 461.3390).

### 2,28-Dihydroxylup-1,20-dien-3-one (7)

Betulone (**2**) (2.00 g, 4.54 mmol) was mixed with potassium *tert*-butoxide (2.00 g, 17.82 mmol) in *tert*-butanol (60 ml). Suspension was stirred at 40 °C. Dry oxygen was constantly introduced in for 55 min. 1 N hydrochloric acid (100 ml) was added to the reaction solution. Precipitate was filtered, washed with water (3x50 ml) and hot water (70 °C, 3x30 ml) and dried in vacuum. Titled compound (**7**) was obtained as yellow solid (1.90 g, 92%). The product was purified on silica (hexane/ethyl ether, 95/5), m.p. 174-178 °C decomp.  $^1\text{H}$  NMR (300 MHz,  $\text{CDCl}_3$ ):  $\delta$  6.45 (s, 1H), 5.91 (s, 1H), 4.71 (s, 1H), 4.62 (s, 1H), 3.81 (d, 1H), 3.37 (d, 1H), 2.41 (m, 1H), 2.02-0.82 (m, 38H).  $^{13}\text{C}$  NMR (75 MHz,  $\text{CDCl}_3$ ):  $\delta$  201.55, 150.52, 144.21, 129.22, 110.26, 60.88, 54.27, 48.92, 48.09, 48.08, 45.88, 44.30, 43.35, 42.07, 38.94, 37.69, 34.27, 34.18, 30.00, 29.42, 27.44, 27.25, 25.35, 21.94, 21.38, 20.49, 19.40, 19.05, 16.79, 14.97. HRMS (ESI):  $m/z$  447.3349 ( $[\text{M}+\text{Na}^+]$   $\text{C}_{30}\text{H}_{46}\text{NaO}_3^+$  requires 477.3339).

### 2-Hydroxy-3-oxolup-1,20-dien-28-oic acid (8)

Betulonic acid (**3**) (0.56 g, 1.23 mmol) was mixed with potassium *tert*-butoxide (0.55 g, 4.90 mmol) in *tert*-butanol (25 ml). Suspension was stirred at 40 °C. Dry oxygen was constantly introduced in for 1 hr. 1 N hydrochloric acid (100 ml) was added to the reaction solution. Precipitate was filtered, washed with water (3x50 ml) and hot water (70 °C, 3x30 ml) and dried in vacuum. Titled compound (**8**) was obtained as white solid (0.54 g, 93%), m.p. 177-184 °C.  $^1\text{H}$  NMR (300 MHz,  $\text{CDCl}_3$ ):  $\delta$  6.48 (s, 1H), 5.95 (s, 1H), 4.72 (s, 1H), 4.65 (s, 1H), 3.08 (m, 1H), 2.26 (m, 2H), 2.00 (m, 2H), 1.80-0.72 (m, 34H).  $^{13}\text{C}$  NMR (75 MHz,  $\text{CDCl}_3$ ):  $\delta$  201.46, 150.32, 144.14, 129.21, 110.17, 56.72, 56.58, 54.23, 49.36, 47.11, 45.92, 44.22, 43.00, 41.77, 38.90, 37.29, 34.19, 32.33, 30.75, 29.79, 27.35, 25.57, 21.82, 21.32, 20.41, 19.57, 18.95, 16.68, 14.82. HRMS (ESI):  $m/z$  491.3139 ( $[\text{M}+\text{Na}^+]$   $\text{C}_{30}\text{H}_{44}\text{NaO}_4^+$  requires 491.3132).

### 2-Hydroxy-19 $\beta$ ,28-epoxy-18 $\alpha$ -olean-1-en-3-one (9)

Allobetulone (**4**) (2.02 g, 4.58 mmol) was mixed with potassium *tert*-butoxide (2.06 g, 18.36 mmol) in *tert*-butanol (100 ml). Suspension was stirred at 40 °C. Dry oxygen was constantly introduced in for 1 hr. 1 N hydrochloric acid (150 ml) was added to the reaction solution. Precipitate was filtered, washed with water (3x60 ml) and hot water (70 °C, 3x30 ml) and dried in vacuum. Titled compound (**9**) was obtained as white solid. The product was purified on silica (hexane/ethyl ether, 90/10) (2.04 g, 95%), m.p. 143-146 °C.  $^1\text{H}$  NMR (300 MHz,  $\text{CDCl}_3$ ):  $\delta$

6.51 (s, 1H), 5.94 (s, 1H), 3.80 (d, 1H), 3.57 (s, 1H), 3.48 (d, 1H), 1.77-0.72 (m, 41H).  $^{13}\text{C}$  NMR (75 MHz,  $\text{CDCl}_3$ ):  $\delta$  201.17, 144.20, 129.39, 88.21, 71.54, 54.50, 47.01, 46.48, 44.33, 41.78, 41.76, 41.33, 39.01, 36.65, 37.01, 34.55, 33.85, 32.99, 29.13, 27.42, 26.63, 26.53, 24.87, 21.92, 21.54, 20.88, 19.00, 16.52, 13.66. HRMS (ESI):  $m/z$  477.3349 ( $[\text{M}+\text{Na}^+]$   $\text{C}_{30}\text{H}_{46}\text{NaO}_3^+$  requires 477.3339).

### 2-Hydroxy-3-oxo-18 $\alpha$ -olean-1-en-28,19 $\beta$ -olide (10)

28-Oxoallobetulone (**5**) (1.01 g, 2.22 mmol) was mixed with potassium *tert*-butoxide (1.03 g, 9.18 mmol) in *tert*-butanol (50 ml). Suspension was stirred at 40 °C. Dry oxygen was constantly introduced in for 2 hr until solution was formed. 1 N hydrochloric acid (60 ml) was added to the reaction solution. Precipitate was filtered, washed with water (3x50 ml) and hot water (70 °C, 3x30 ml) and dried in vacuum. Titled compound (**10**) was obtained as white solid (0.96 g, 92%). Crystallization from methanol gave colorless crystals, m.p. 313-316 °C decomp.  $^1\text{H}$  NMR (300 MHz,  $\text{CDCl}_3$ ):  $\delta$  6.47 (s, 1H), 5.92 (s, 1H), 3.96 (s, 1H), 1.92-0.88 (m, 41H).  $^1\text{H}$  NMR (300 MHz,  $\text{Py-d}_5$ ):  $\delta$  10.09 (s, 1H), 6.70 (s, 1H), 4.08 (s, 1H), 2.03-0.82 (m, 41H).  $^{13}\text{C}$  NMR (75 MHz,  $\text{Py-d}_5$ ):  $\delta$  201.17, 179.49, 146.62, 129.87, 85.76, 54.28, 46.72, 46.72, 46.19, 44.79, 41.41, 40.44, 38.71, 36.58, 33.71, 33.57, 32.72, 32.01, 28.78, 28.13, 27.82, 26.40, 25.97, 23.61, 21.89, 21.36, 21.04, 19.01, 15.84, 13.50. HRMS (ESI):  $m/z$  491.3143 ( $[\text{M}+\text{Na}^+]$   $\text{C}_{30}\text{H}_{44}\text{NaO}_4^+$  requires 491.3132).

### 3 $\beta$ -Hydroxy-1(2 $\rightarrow$ 3)-abeolup-20-en-2-oic acid (11)

2-Hydroxylup-1,20-dien-3-one (**6**) (1.00 g, 2.28 mmol) was mixed with potassium hydroxide powder (0.64 g, 11.40 mmol) in *tert*-butanol (40 ml) containing water (2 ml). Resulting mixture was stirred at 75 °C for 11 hr. Reaction mixture was poured in 1 N hydrochloric acid (150 ml). White precipitate was filtered, washed with water (4x50 ml) and dried to give titled compound (**11**) (0.90 g, 87%). Crystallization from benzene gave white crystals, m.p. 248-251 °C.  $^1\text{H}$  NMR (300 MHz,  $\text{CDCl}_3$ ):  $\delta$  4.71 (s, 1H), 4.59 (s, 1H), 2.40 (m, 1H), 2.10(d, 1H), 1.94 (m, 1H), 1.80-0.81 (m, 41H).  $^{13}\text{C}$  NMR (75 MHz,  $\text{CDCl}_3$ ):  $\delta$  181.99, 151.19, 109.62, 87.35, 62.19, 53.98, 50.68, 48.79, 48.55, 48.28, 44.12, 43.22, 43.20, 41.94, 40.28, 38.46, 35.88, 34.56, 30.08, 27.91, 27.38, 25.12, 23.84, 21.05, 19.55, 19.07, 18.25, 16.94, 16.43, 15.00. HRMS (ESI):  $m/z$  479.3509 ( $[\text{M}+\text{Na}^+]$   $\text{C}_{30}\text{H}_{48}\text{NaO}_3^+$  requires 479.3496).

### 3 $\beta$ ,28-Dihydroxy-1(2 $\rightarrow$ 3)-abeolup-20-en-2-oic acid (12)

2,28-Dihydroxylup-1,20-dien-3-one (**7**) (1.00 g, 2.20 mmol) was mixed with potassium hydroxide powder (0.62 g, 11.00 mmol) in *tert*-butanol (40 ml) containing water (2 ml). Resulting mixture was stirred at 75 °C for 24 hr. Reaction mixture was poured in 1 N hydrochloric acid (150 ml). White precipitate was filtered, washed with water (4x50 ml) and dried to give titled compound (**12**) (0.78 g, 75%). Crystallization from benzene gave white crystals, m.p. 251-254 °C.  $^1\text{H}$  NMR (300 MHz,  $\text{CD}_3\text{OD}$ ):  $\delta$  4.71 (s, 1H), 4.60 (s, 1H), 3.77(d, 1H), 3.33 (d, 1H), 2.44 (m, 1H), 2.11 (d, 1H), 2.04-0.92 (m, 39H).  $^{13}\text{C}$  NMR (75 MHz,  $\text{CD}_3\text{OD}$ ):  $\delta$  179.91, 151.86, 110.26, 88.09, 63.25, 60.32, 55.00, 51.85, 50.01, 48.95, 48.60, 48.20, 44.80, 43.91, 43.00, 38.87, 35.60, 35.10, 30.80, 30.41, 28.40, 27.80, 26.40, 24.60, 21.11, 19.86, 19.40, 17.39, 16.74, 15.33. HRMS (ESI):  $m/z$  495.3547 ( $[\text{M}+\text{Na}^+]$   $\text{C}_{30}\text{H}_{48}\text{NaO}_4^+$  requires 495.3445).

### 3 $\beta$ -Hydroxy-1(2 $\rightarrow$ 3)-abeolup-20-ene-2,28-dioic acid (13)

2-Hydroxy-3-oxolup-1,20-dien-28-oic acid (**8**) (1.00 g, 2.13 mmol) was mixed with potassium hydroxide powder (0.60 g, 10.65 mmol) in *tert*-butanol (40 ml) containing water (2 ml). Resulting mixture was stirred at 75 °C for 24 hr. Reaction mixture was poured in 1 N hydrochloric acid (100 ml). White precipitate was filtered, washed with water (4x50 ml) and dried to give titled compound (**13**) (0.82 g, 79%). Crystallization from methanol gave white crystals, m.p. 210-217 °C.  $^1\text{H}$  NMR (300 MHz,  $\text{CDCl}_3$ ):  $\delta$  4.75 (s, 1H), 4.63 (s, 1H), 3.00 (m, 1H), 2.40-1.90 (m, 4H), 1.80-0.75 (m, 36H).  $^{13}\text{C}$  NMR (75 MHz,  $\text{CDCl}_3$ ):  $\delta$  183.18, 182.43, 150.55, 110.02, 87.28, 62.24, 56.65, 50.75, 49.49, 48.75, 47.21, 44.10, 42.80, 41.80, 38.84, 37.37, 34.62, 32.45, 30.81, 29.87, 27.36, 25.52, 23.71, 21.07, 19.61, 19.35, 19.00, 16.87, 16.40, 15.16. HRMS (ESI):  $m/z$  509.3251 ( $[\text{M}+\text{Na}^+]$   $\text{C}_{30}\text{H}_{46}\text{NaO}_5^+$  requires 509.3238).

### 19 $\beta$ ,28-Epoxy-3 $\beta$ -hydroxy-1(2 $\rightarrow$ 3)-abeo-18 $\alpha$ -oleanan-2-oic acid (14)

Method A. 2-Hydroxy-19 $\beta$ ,28-epoxy-18 $\alpha$ -olean-1-en-3-one (**9**) (1.00 g, 2.20 mmol) was mixed with potassium hydroxide powder (0.62 g, 11.00 mmol) in *tert*-butanol (40 ml) containing water (2.0 ml). Resulting mixture was stirred at 75 °C for 11 hr. Reaction mixture was poured in 1 N hydrochloric acid (200 ml). White precipitate was filtered off, washed with water (4x50 ml), dried and crystallized from toluene to give titled compound (**14**) (0.87 g, 84%), m.p. 299-304 °C. <sup>1</sup>H NMR (300 MHz, CDCl<sub>3</sub>):  $\delta$  3.62 (d, 1H), 3.50 (s, 1H), 3.32 (d, 1H), 2.15 (d, 1H), 1.78 (d, 1H), 1.72-0.62 (m, 41H). <sup>13</sup>C NMR (75 MHz, CDCl<sub>3</sub>):  $\delta$  178.49, 87.50, 86.63, 70.96, 62.37, 54.56, 51.33, 47.66, 43.90, 41.63, 41.04, 36.78, 36.63, 34.58, 34.22, 34.02, 33.15, 29.52, 27.96, 26.88, 26.53, 26.48, 26.32, 24.94, 24.04, 21.38, 19.00, 17.48, 16.21, 14.16. HRMS (ESI):  $m/z$  473.3627 ([M+H<sup>+</sup>] C<sub>30</sub>H<sub>49</sub>O<sub>4</sub><sup>+</sup> requires 473.3625).

Method B ("one pot" synthesis). Oxygen was constantly introduced into the vigorously stirred mixture of allobetulone (**4**) (0.10 g, 0.22 mmol) and potassium *tert*-butoxide (0.10 g, 0.89 mmol) in *tert*-butanol (7 ml) at 40 °C for 1 hr. Then water (0.7 ml) was added and reaction mixture was stirred at 70-75 °C for 24 hr, cooled to room temperature, diluted with 1 N hydrochloric acid (80 ml), stirred at room temperature for 1 hr, filtered, washed with water, dried and crystallized from toluene to give titled compound (**14**) (0.08 g, 80%).

### 19 $\beta$ ,28-Epoxy-3 $\beta$ -hydroxy-28-oxo-1(2 $\rightarrow$ 3)-abeo-18 $\alpha$ -oleanan-2-oic acid (**15**)

2-Hydroxy-3-oxo-18 $\alpha$ -olean-1-en-28,19 $\beta$ -olide (**10**) (0.55 g, 1.17 mmol) was mixed with potassium hydroxide powder (0.33 g, 5.87 mmol) in *tert*-butanol (21.4 ml) containing water (1.06 ml). Resulting mixture was stirred at 80 °C for 22 hr. Reaction mixture was poured in 1 N hydrochloric acid (100 ml). White precipitate was filtered, washed with water (4x50 ml) and dried to give titled compound (**15**) (0.55 g, 96%). Crystallization from methanol gave colorless crystals, m.p. 284-286 °C. <sup>1</sup>H NMR (300 MHz, CDCl<sub>3</sub>):  $\delta$  3.94 (s, 1H), 2.12 (d, 1H), 1.89-0.90 (m, 42H). <sup>13</sup>C NMR (75 MHz, CDCl<sub>3</sub>):  $\delta$  180.86, 179.91, 87.12, 86.12, 62.11, 54.11, 51.17, 48.52, 46.76, 46.13, 43.88, 41.42, 40.07, 36.13, 33.71, 33.55, 32.30, 31.96, 28.75, 28.15, 27.09, 26.29, 25.53, 23.96, 23.57, 20.63, 18.64, 17.15, 15.57, 13.84. HRMS (ESI):  $m/z$  509.3239 ([M+Na<sup>+</sup>] C<sub>30</sub>H<sub>46</sub>NaO<sub>5</sub><sup>+</sup> requires 509.3238).

### Methyl 3 $\beta$ -hydroxy-1(2 $\rightarrow$ 3)-abeolup-20-en-2-oate (**16**) and methyl 3 $\alpha$ -hydroxy-1(2 $\rightarrow$ 3)-abeolup-20-en-2-oate (**16'**)

Method A. 3 $\beta$ -Hydroxy-1(2 $\rightarrow$ 3)-abeolup-20-en-2-oic acid (**11**) (50.5 mg, 110.6  $\mu$ mol) was dissolved in ethyl ether (3 ml). Ethereal diazomethane (2 ml, ~0.02 g/ml) was added to form yellow solution. Mixture was stirred for 30 min. Reaction solution was flashed with dry nitrogen<sup>1</sup> to remove diazomethane excess and evaporated in vacuum to give methyl 3 $\beta$ -hydroxy-1(2 $\rightarrow$ 3)-abeolup-20-en-2-oate (**16**) as white solid (51.0 mg, 98%).

Method B. 2-Hydroxylup-1,20-dien-3-one (**6**) (0.40 g, 0.91 mmol) was added to a solution of potassium methoxide (0.06 g, 0.91 mmol) in dry methanol (30 ml). Reaction mixture was kept at 60 °C in closed vial for 3 days. Then it was cooled to room temperature, diluted with water (100 ml) and acidified with 3% hydrochloric acid. Precipitate was filtered, washed with water and dried to give mixture of isomers **16/16'** (78/22 ratio, 0.41 g, 95%). It was separated on silica (hexanes/ethyl ether, 95/5). Methyl 3 $\beta$ -hydroxy-1(2 $\rightarrow$ 3)-abeolup-20-en-2-oate (**16**) was isolated with the first fraction, R<sub>f</sub> = 0.33. Methyl 3 $\alpha$ -hydroxy-1(2 $\rightarrow$ 3)-abeolup-20-en-2-oate (**16'**) was isolated with the second fraction, R<sub>f</sub> = 0.25.

Methyl 3 $\beta$ -hydroxy-1(2 $\rightarrow$ 3)-abeolup-20-en-2-oate (**16**), m.p. 159-162 °C, [ $\alpha$ ]<sub>D</sub> +35.6° (ethanol). <sup>1</sup>H NMR (300 MHz, CDCl<sub>3</sub>):  $\delta$  4.70 (s, 1H), 4.58 (s, 1H), 3.78 (s, 3H), 3.23 (s, 1H), 2.39 (m, 1H), 2.04-0.81 (m, 43H). <sup>13</sup>C NMR (75 MHz, CDCl<sub>3</sub>):  $\delta$  177.70, 151.16, 109.61, 87.38, 62.22, 53.52, 52.44, 50.65, 48.89, 48.57, 48.56, 48.26, 44.11, 43.23, 41.92, 40.28, 38.45, 35.89, 34.57, 30.08, 27.91, 27.29, 25.14, 23.83, 21.15, 19.57, 19.06, 18.25, 16.68, 16.44, 15.03. HRMS (ESI):  $m/z$  493.3646 ([M+Na<sup>+</sup>] C<sub>31</sub>H<sub>50</sub>NaO<sub>3</sub><sup>+</sup> requires 493.3652).

Methyl 3 $\alpha$ -hydroxy-1(2 $\rightarrow$ 3)-abeolup-20-en-2-oate (**16'**), m.p. 223-226 °C, [ $\alpha$ ]<sub>D</sub> +13.7° (ethanol). <sup>1</sup>H NMR (500 MHz, CDCl<sub>3</sub>):  $\delta$  4.62 (s, 1H), 4.50 (s, 1H), 3.67 (s, 3H), 3.00 (s, 1H), 2.47 (d, 1H), 2.30 (m, 1H), 1.84 (m, 1H), 1.70-0.69 (m, 41H). <sup>13</sup>C NMR (125 MHz, CDCl<sub>3</sub>):  $\delta$  176.13, 151.22, 109.60, 87.06, 59.94, 54.44, 52.22, 51.52, 48.79, 48.56, 48.31, 43.69, 43.24, 43.22, 42.25, 40.29, 38.52, 35.88, 34.61, 30.12, 27.92, 25.19, 24.83, 23.78, 21.30, 19.56, 18.62, 18.24, 18.07, 16.30, 15.01. HRMS (ESI):  $m/z$  493.3649 ([M+Na<sup>+</sup>] C<sub>31</sub>H<sub>50</sub>NaO<sub>3</sub><sup>+</sup> requires 493.3652).

### Methyl 3 $\beta$ ,28-dihydroxy-1(2 $\rightarrow$ 3)-abeolup-20-en-2-oate (**17**)

<sup>1</sup> Nitrogen-overflow passed through 3% hydrochloric acid for diazomethane detoxification.

3 $\beta$ ,28-Dihydroxy-1(2 $\rightarrow$ 3)-abeolup-20-en-2-oic acid (**12**) (51.0 mg, 107.9  $\mu$ mol) was dissolved in ethyl ether (3 ml). Ethereal diazomethane (2 ml,  $\sim$ 0.02 g/ml) was added to form yellow solution. Mixture was stirred for 30 min. Reaction solution was flashed with dry nitrogen<sup>1</sup> to remove diazomethane excess and evaporated in vacuum to give titled compound (**17**) as white solid (52.0 mg, 99%), m.p. 167-169 °C. <sup>1</sup>H NMR (300 MHz, CDCl<sub>3</sub>):  $\delta$  4.68 (s, 1H), 4.58 (s, 1H), 3.80 (d, 1H), 3.77 (s, 3H), 3.34 (d, 1H), 3.24 (s, 1H), 2.39 (m, 1H), 2.07-0.81 (m, 40H). <sup>13</sup>C NMR (75 MHz, CDCl<sub>3</sub>):  $\delta$  177.64, 150.68, 109.95, 87.38, 62.20, 60.70, 53.50, 52.45, 50.62, 49.00, 48.87, 48.05, 47.99, 44.06, 43.09, 42.00, 37.69, 34.53, 34.24, 30.00, 29.97, 27.50, 27.27, 25.22, 23.72, 21.11, 19.34, 19.03, 16.67, 16.44, 15.25. HRMS (ESI):  $m/z$  509.3613 ([M+Na<sup>+</sup>] C<sub>31</sub>H<sub>50</sub>NaO<sub>4</sub><sup>+</sup> requires 509.3601).

#### Dimethyl 3 $\beta$ -hydroxy-1(2 $\rightarrow$ 3)-abeolup-20-ene-2,28-dioate (**18**)

3 $\beta$ -Hydroxy-1(2 $\rightarrow$ 3)-abeolup-20-ene-2,28-dioic acid (**13**) (51.0 mg, 104.8  $\mu$ mol) was dissolved in diethyl ether (3 ml). Ethereal diazomethane (2 ml,  $\sim$ 0.02 g/ml) was added to form yellow solution. Mixture was stirred for 30 min. Reaction solution was flashed with dry nitrogen<sup>1</sup> to remove diazomethane excess and evaporated in vacuum to give titled compound (**18**) as white solid (53.0 mg, 98%). <sup>1</sup>H NMR (300 MHz, CDCl<sub>3</sub>):  $\delta$  4.75 (s, 1H), 4.62 (s, 1H), 3.82 (s, 3H), 3.80 (s, 3H), 3.20 (s, 1H), 3.00 (m, 1H), 2.12-2.29 (m, 2H), 2.08 (d, 1H), 1.70-1.90 (m, 2H), 1.80-0.70 (m, 34H). <sup>13</sup>C NMR (75 MHz, CDCl<sub>3</sub>):  $\delta$  177.66, 176.91, 150.79, 109.84, 87.37, 62.26, 56.77, 53.54, 52.45, 51.55, 50.78, 49.73, 48.88, 47.27, 44.10, 42.78, 41.76, 38.70, 37.27, 34.61, 32.51, 30.86, 30.12, 27.28, 25.55, 23.78, 21.13, 19.65, 19.04, 16.67, 16.40, 15.21. HRMS (ESI):  $m/z$  537.3549 ([M+Na<sup>+</sup>] C<sub>32</sub>H<sub>50</sub>NaO<sub>5</sub><sup>+</sup> requires 537.3551).

#### Methyl 19 $\beta$ ,28-epoxy-3 $\beta$ -hydroxy-1(2 $\rightarrow$ 3)-abeo-18 $\alpha$ -oleanan-2-oate (**19**)

19 $\beta$ ,28-Epoxy-3 $\beta$ -hydroxy-1(2 $\rightarrow$ 3)-abeo-18 $\alpha$ -oleanan-2-oic acid (**14**) (50.0 mg, 105.8  $\mu$ mol) was dissolved in ethyl ether (3 ml). Ethereal diazomethane (2 ml,  $\sim$ 0.02 g/ml) was added to form yellow solution. Mixture was stirred for 30 min. Reaction solution was flashed with dry nitrogen<sup>1</sup> to remove diazomethane excess and evaporated in vacuum to give titled compound (**19**) as white solid (50.0 mg, 97%), m.p. 225-229 °C. <sup>1</sup>H NMR (300 MHz, CDCl<sub>3</sub>):  $\delta$  3.80 (s, 3H), 3.79 (d, 1H), 3.55 (s, 1H), 3.47 (d, 1H), 3.20 (s, 1H), 2.08 (d, 1H), 1.80 (d, 1H), 1.70-0.70 (m, 40H). <sup>13</sup>C NMR (75 MHz, CD<sub>3</sub>OD):  $\delta$  179.07, 90.27, 89.14, 72.92, 63.91, 55.70, 53.34, 52.94, 50.03, 48.68, 45.52, 43.28, 42.62, 38.29, 37.90, 36.26, 35.70, 34.36, 30.11, 28.40, 28.01, 27.80, 25.84, 25.80, 25.49, 21.81, 20.42, 18.54, 17.21, 15.13. HRMS (ESI):  $m/z$  509.3613 ([M+Na<sup>+</sup>] C<sub>31</sub>H<sub>50</sub>NaO<sub>4</sub><sup>+</sup> requires 509.3601).

#### Methyl 19 $\beta$ ,28-epoxy-3 $\beta$ -hydroxy-28-oxo-1(2 $\rightarrow$ 3)-abeo-18 $\alpha$ -oleanan-2-oate (**20**)

19 $\beta$ ,28-Epoxy-3 $\beta$ -hydroxy-28-oxo-1(2 $\rightarrow$ 3)-abeo-18 $\alpha$ -oleanan-2-oic acid (**15**) (33.7 mg, 69.2  $\mu$ mol) was dissolved in tetrahydrofuran (2.5 ml). Ethereal diazomethane (2 ml,  $\sim$ 0.02 g/ml) was added to form yellow solution. Mixture was stirred for 30 min. Reaction solution was flashed with dry nitrogen<sup>1</sup> to remove diazomethane excess and evaporated in vacuum to give titled compound (**20**) as white solid (34.3 mg, 99%), m.p. 273-276 °C. <sup>1</sup>H NMR (300 MHz, CDCl<sub>3</sub>):  $\delta$  3.94 (s, 1H), 3.78 (s, 3H), 3.17 (s, 1H), 2.06 (d, 1H), 1.89-0.88 (m, 42H). <sup>13</sup>C NMR (75 MHz, CDCl<sub>3</sub>):  $\delta$  179.82, 177.16, 87.17, 86.07, 62.15, 53.56, 52.22, 51.16, 48.60, 46.77, 46.09, 43.82, 41.39, 40.07, 36.12, 33.74, 33.54, 32.30, 31.97, 28.75, 28.14, 26.98, 26.31, 25.55, 23.95, 23.55, 20.73, 18.63, 16.85, 15.58, 13.88. HRMS (ESI):  $m/z$  523.3391 ([M+Na<sup>+</sup>] C<sub>31</sub>H<sub>48</sub>NaO<sub>5</sub><sup>+</sup> requires 523.3394).

#### Potassium 1-oxo-1,3-seco-2-norlup-20-en-3-oate (**21**)

Potassium hydroxide powder (0.0218 g, 0.3885 mmol) was dissolved in methanol (5 ml). 1 $\alpha$ -Hydroxy-2-oxa-2-norlup-20-en-3-one (**31**) (0.1720 g, 0.3885 mmol) was added to the solution. Resulting mixture was stirred and refluxed for 2 hr. Reaction mixture was evaporated in vacuum. Solid product was dried in vacuum (0.1 torr, 90 °C) to give titled compound (**21**) as white powder (0.1851 g, 99%). <sup>1</sup>H NMR (300 MHz, CD<sub>3</sub>OD, 1wt% KOH):  $\delta$  9.19 (s, 1H), 4.70 (s, 1H), 4.58 (s, 1H), 2.40 (m, 1H), 2.10 (m, 1H), 2.06-0.71 (m, 40H). <sup>13</sup>C NMR (300 MHz, CD<sub>3</sub>OD, 1wt% KOH):  $\delta$  206.98, 184.93, 150.49, 109.18, 54.52, 48.48, 48.16, 47.83, 47.03, 43.29, 42.99, 40.97, 39.73, 39.30, 38.71, 35.39, 33.21, 30.08, 29.73, 27.47, 26.65, 25.04, 23.12, 19.79, 18.53, 17.38, 15.33, 13.85, 11.26. HRMS (ESI):  $m/z$  503.2891 ([M+Na<sup>+</sup>] C<sub>29</sub>H<sub>45</sub>KNaO<sub>3</sub><sup>+</sup> requires 503.2898).

#### Potassium 28-hydroxy-1-oxo-1,3-seco-2-norlup-20-en-3-oate (**22**)

Potassium hydroxide powder (0.0252 g, 0.4491 mmol) was dissolved in methanol (5 ml). 1 $\alpha$ ,28-Dihydroxy-2-oxa-2-norlup-20-en-3-one (**32**) (0.2060 g, 0.4491 mmol) was added to the solution. Resulting mixture was stirred and refluxed for 2 hr. Reaction mixture was evaporated in vacuum. Solid product was dried in vacuum (0.1 torr, 90 °C) to give titled compound (**22**) as white powder (0.2215 g, 99%). <sup>1</sup>H NMR (300 MHz, CD<sub>3</sub>OD, 1wt% KOH):  $\delta$  9.22 (s, 1H), 4.68 (s, 1H), 4.57 (s, 1H), 3.74 (d, 1H), 3.29 (d, 1H), 2.42 (m, 1H), 2.20 (m, 1H), 2.06-0.71 (m, 37H). <sup>13</sup>C NMR (300 MHz, CD<sub>3</sub>OD, 1wt% KOH):  $\delta$  207.30, 185.10, 150.54, 109.18, 59.13, 54.43, 48.65, 48.32, 47.95, 47.81, 47.67, 43.16, 39.82, 39.12, 37.89, 33.91, 33.10, 29.68, 29.05, 27.02, 25.13, 25.07, 24.18, 22.88, 20.27, 18.25, 15.16, 13.99, 11.35. HRMS (ESI):  $m/z$  519.2852 ([M+Na<sup>+</sup>] C<sub>29</sub>H<sub>45</sub>KNaO<sub>4</sub><sup>+</sup> requires 519.2847).

#### Potassium 1-oxo-1,3-seco-2-norlup-20-en-3,28-dioate (**23**)

Potassium hydroxide powder (0.0223 g, 0.3974 mmol) was dissolved in methanol (5 ml). 1 $\alpha$ -Hydroxy-2-oxa-3-oxo-2-norlup-20-en-28-oic acid (**33**) (0.0939 g, 0.1987 mmol) was added to the solution. Resulting mixture was stirred and refluxed for 2 hr. Reaction mixture was evaporated in vacuum. Solid product was dried in vacuum (0.1 torr, 90 °C) to give titled compound (**23**) as white powder (0.1081 g, 99%). <sup>1</sup>H NMR (300 MHz, CD<sub>3</sub>OD, 1wt% KOH):  $\delta$  9.21 (s, 1H), 4.69 (s, 1H), 4.55 (s, 1H), 3.20 (m, 1H), 2.80-2.55 (m, 2H), 2.34-0.72 (m, 36H). <sup>13</sup>C NMR (300 MHz, CD<sub>3</sub>OD, 1wt% KOH):  $\delta$  207.37, 185.11, 183.47, 151.93, 108.29, 57.85, 54.60, 49.52, 48.50, 47.80, 47.29, 42.96, 39.64, 39.54, 38.52, 37.99, 33.40, 31.05, 30.06, 26.01, 25.67, 25.50, 23.47, 23.21, 19.99, 18.57, 15.60, 13.87, 11.30. HRMS (ESI):  $m/z$  571.2185 ([M+Na<sup>+</sup>] C<sub>29</sub>H<sub>42</sub>K<sub>2</sub>NaO<sub>5</sub><sup>+</sup> requires 571.2199).

#### Potassium 19 $\beta$ ,28-epoxy-1-oxo-2-nor-18 $\alpha$ -oleanan-3-oate (**24**)

Potassium hydroxide powder (0.0202 g, 0.3600 mmol) was dissolved in methanol (5 ml). 19 $\beta$ ,28-Epoxy-1 $\alpha$ -hydroxy-2-oxa-2-nor-18 $\alpha$ -oleanan-3-one (**34**) (0.1651 g, 0.3600 mmol) was added to the solution. Resulting mixture was stirred and refluxed for 2 hr. Reaction mixture was evaporated in vacuum. Solid product was dried in vacuum (0.1 torr, 90 °C) to give titled compound (**24**) as white powder (0.1773 g, 99%). <sup>1</sup>H NMR (300 MHz, CD<sub>3</sub>OD, 1wt% KOH):  $\delta$  9.28 (s, 1H), 3.82 (d, 1H), 3.57 (s, 1H), 3.51 (d, 1H), 2.25 (m, 1H), 1.96 (m, 1H), 1.70-0.90 (m, 39H). <sup>13</sup>C NMR (300 MHz, CD<sub>3</sub>OD, 1wt% KOH):  $\delta$  208.40, 186.28, 89.51, 72.19, 55.65, 48.88, 47.89, 42.70, 42.31, 40.78, 40.61, 37.52, 37.21, 36.04, 33.85, 33.76, 29.24, 27.61, 27.10, 27.03, 26.08, 25.40, 24.84, 24.15, 21.46, 16.14, 13.86, 12.79. HRMS (ESI):  $m/z$  519.2841 ([M+Na<sup>+</sup>] C<sub>29</sub>H<sub>45</sub>KNaO<sub>4</sub><sup>+</sup> requires 519.2847).

#### Potassium 19 $\beta$ ,28-epoxy-1,28-dioxo-1,3-seco-2-nor-18 $\alpha$ -oleanan-3-oate (**25**)

Potassium hydroxide powder (0.0182 g, 0.3243 mmol) was dissolved in methanol (5 ml). 1 $\alpha$ -Hydroxy-2-oxa-3-oxo-2-nor-18 $\alpha$ -oleanan-28,19 $\beta$ -olide (**35**) (0.1533 g, 0.3243 mmol) was added to the solution. Resulting suspension was stirred and refluxed for 2 hr. Reaction mixture was evaporated in vacuum. Solid product was dried in vacuum (0.1 torr, 90 °C) to give titled compound (**25**) as white powder (0.1632 g, 99%), m.p. 464-465 °C decomp. <sup>1</sup>H NMR (300 MHz, CD<sub>3</sub>OD, 1wt% KOH):  $\delta$  9.24 (s, 1H), 4.01 (s, 1H), 2.22-0.89 (m, 41H). <sup>13</sup>C NMR (75 MHz, CD<sub>3</sub>OD, 1wt% KOH):  $\delta$  208.26, 186.21, 182.18, 87.71, 55.67, 47.67, 47.63, 41.51, 40.97, 40.54, 37.99, 34.55, 33.69, 33.52, 32.72, 29.13, 29.10, 26.97, 26.48, 26.46, 25.12, 24.04, 21.27, 15.89, 13.96, 12.77. HRMS (ESI):  $m/z$  533.2636 ([M+Na<sup>+</sup>] C<sub>29</sub>H<sub>43</sub>KNaO<sub>5</sub><sup>+</sup> requires 533.2640).

#### 1 $\alpha$ -Hydroxy-2-oxa-2-norlup-20-en-3-one (**31**)

Lupenone (**1**) (0.50 g, 1.18 mmol) was mixed with potassium *tert*-butoxide (0.50 g, 4.45 mmol) in *tert*-butanol (20 ml). Suspension was stirred and heated at 40 °C. Dry oxygen was bubbled in for 26 hr. Reaction suspension was evaporated in vacuum. Solid residue was washed with dichloromethane (2x40 ml) at room temperature. Precipitate was filtered and dried. It was suspended in water (20 ml) and treated with 1 N hydrochloric acid (20 ml). White precipitate was filtered, washed with water (5x30 ml) and dried. The product was purified on silica (ethyl ether eluent) to give white solid product (0.45 g, 87%), m.p. 146-148 °C.<sup>2</sup> <sup>1</sup>H NMR (300 MHz, CDCl<sub>3</sub>):  $\delta$  5.27 (s, 0.84H),

<sup>2</sup> The chemical structure for products **31-35/26-30** was assigned after <sup>1</sup>H NMR analysis in solutions where they consisted of two tautomeric forms. The chemical structure for these products in a solid state could be different but was not studied.

4.67 (s, 1H), 4.54 (s, 1H), 2.36 (m, 1H), 2.30-0.80 (m, 41H), contains 16% of 1-oxo-2-nor-2,3-secolupan-3-oic acid (**26**) ( $\delta$  9.23 (s, 0.16H)).  $^{13}\text{C}$  NMR (75 MHz,  $\text{CDCl}_3$ ):  $\delta$  179.45, 151.08, 109.77, 100.99, 48.40, 48.24, 43.44, 43.21, 42.61, 40.61, 40.50, 40.21, 39.61, 38.29, 35.74, 32.86, 29.99, 28.89, 27.66, 24.89, 23.79, 21.23, 19.50, 19.10, 18.27, 16.00, 14.78, 14.09. HRMS (ESI):  $m/z$  465.3337 ( $[\text{M}+\text{Na}^+]$   $\text{C}_{29}\text{H}_{46}\text{NaO}_3^+$  requires 465.3339).

#### 1 $\alpha$ ,28-Dihydroxy-2-oxa-2-norlup-20-en-3-one (32)

Betulone (**2**) (1.00 g, 2.27 mmol) was mixed with potassium *tert*-butoxide (1.00 g, 8.87 mmol) in *tert*-butanol (40 ml). Suspension was stirred and heated at 40 °C. Dry oxygen was bubbled in for 30 hr. Reaction mixture was evaporated in vacuum. Solid residue was washed with dichloromethane (2x40 ml) at room temperature. Precipitate was filtered and dried. It was suspended in water (20 ml) and treated with 1 N hydrochloric acid (20 ml). White precipitate was filtered, washed with water (5x30 ml) and dried. The product was purified on silica (ethyl ether eluent) to give white solid product (0.80 g, 77%), m.p. 154-157 °C.  $^1\text{H}$  NMR (300 MHz,  $\text{CDCl}_3$ ):  $\delta$  5.29 (s, 0.78H), 4.68 (s, 1H), 4.58 (s, 1H), 3.81 (d, 1H), 3.36 (d, 1H), 2.40 (m, 1H), 1.97-0.79 (m, 38H), contains 21% of 1-oxo-28-hydroxy-1,3-seco-2-norlupan-3-oic acid (**27**) ( $\delta$  9.26 (s, 0.21H)).  $^{13}\text{C}$  NMR (75 MHz,  $\text{CDCl}_3$ ):  $\delta$  179.37, 150.55, 110.11, 100.93, 60.75, 48.84, 48.03, 47.96, 43.31, 42.60, 40.59, 40.19, 39.58, 37.56, 34.19, 32.82, 29.88, 29.32, 28.87, 27.24, 24.97, 23.76, 21.12, 19.26, 19.05, 15.97, 14.97, 14.06. HRMS (ESI):  $m/z$  481.3289 ( $[\text{M}+\text{Na}^+]$   $\text{C}_{29}\text{H}_{46}\text{NaO}_4^+$  requires 481.3288).

#### 1 $\alpha$ -Hydroxy-2-oxa-3-oxo-2-norlup-20-en-28-oic acid (33)

Betulonic acid (**3**) (1.00 g, 2.20 mmol) was mixed with potassium *tert*-butoxide (1.00 g, 8.90 mmol) in *tert*-butanol (40 ml). Suspension was stirred and heated at 40 °C. Dry oxygen was bubbled in for 26 hr. Reaction mixture was evaporated in vacuum. Solid residue was washed with dichloromethane (2x40 ml) at room temperature. Precipitate was filtered and dried. It was suspended in water (40 ml) and treated with 1 N hydrochloric acid (20 ml). White precipitate was filtered, washed with water (5x30 ml) and dried to give white solid product (0.80 g, 77%), m.p. 190-208 °C.  $^1\text{H}$  NMR (300 MHz,  $\text{CDCl}_3$ ):  $\delta$  5.29 (s, 0.85H), 4.75 (s, 1H), 4.63 (s, 1H), 3.00 (m, 1H), 2.50-0.70 (m, 38H), contains 15% of 1-oxo-1,3-seco-2-norlup-20-en-3,28-dioic acid (**28**) ( $\delta$  9.35 (s, 0.15H)).  $^{13}\text{C}$  NMR (75 MHz,  $\text{DMSO}-d_6$ ):  $\delta$  179.38, 177.93, 151.01, 110.39, 100.78, 56.05, 54.39, 49.10, 47.30, 46.43, 43.01, 42.58, 40.99, 40.28, 39.58, 38.25, 37.00, 33.03, 32.34, 30.71, 29.83, 29.23, 25.49, 24.58, 24.04, 19.63, 16.05, 15.00, 14.65. HRMS (ESI):  $m/z$  495.3093 ( $[\text{M}+\text{Na}^+]$   $\text{C}_{29}\text{H}_{44}\text{NaO}_5^+$  requires 495.3081).

#### 19 $\beta$ ,28-Epoxy-1 $\alpha$ -hydroxy-2-oxa-2-nor-18 $\alpha$ -oleanan-3-one (34)

Allobetulone (**4**) (0.53 g, 1.20 mmol) was mixed with potassium *tert*-butoxide (0.50 g, 4.45 mmol) in *tert*-butanol (20 ml). Suspension was stirred and heated at 40 °C. Dry oxygen was bubbled in for 26 hr. Reaction mixture was evaporated in vacuum. Solid residue was washed with dichloromethane (2x40 ml) at room temperature. Precipitate was filtered and dried. It was suspended in water (20 ml) and treated with 1 N hydrochloric acid (20 ml). White precipitate was filtered, washed with water (5x30 ml) and dried to give white solid product (0.45 g, 82%), m.p. 236-245 °C.  $^1\text{H}$  NMR (300 MHz,  $\text{CDCl}_3$ ):  $\delta$  5.29 (s, 1H), 3.75 (d, 1H), 3.52 (s, 1H), 3.47 (d, 1H), 2.50-1.70 (m, 2H), 1.70-0.70 (m, 39H). HRMS (ESI):  $m/z$  481.3287 ( $[\text{M}+\text{Na}^+]$   $\text{C}_{29}\text{H}_{46}\text{NaO}_4^+$  requires 481.3288).

#### 1 $\alpha$ -Hydroxy-2-oxa-3-oxo-2-nor-18 $\alpha$ -oleanan-28,19 $\beta$ -olide (35)

28-Oxoallobetulone (**5**) (1.01 g, 2.22 mmol) was mixed with potassium *tert*-butoxide (1.00 g, 8.87 mmol) in *tert*-butanol (50 ml). Suspension was stirred and heated at 50 °C. Dry oxygen was bubbled in for 50 hr. Reaction suspension was evaporated in vacuum. Solid residue was washed with dichloromethane (2x40 ml) at room temperature. Precipitate was filtered and dried. It was suspended in water (20 ml) and treated with 1 N hydrochloric acid (20 ml). White precipitate was filtered, washed with water (5x30 ml) and dried. Product was refluxed with methanol (10 ml). Precipitate was hot filtered, washed with methanol (10 ml) and dried to give white solid product (0.78 g, 74%), m.p. 351-353 °C decomp.  $^1\text{H}$  NMR (300 MHz,  $\text{CDCl}_3$ ):  $\delta$  5.33 (s, 1H), 3.93 (s, 1H), 2.20-0.92 (m, 41H).  $^1\text{H}$  NMR (300 MHz,  $\text{Py}-d_5$ ):  $\delta$  5.67 (s, 0.6H), 4.04 (m, 1H), 2.51-0.83 (m, 41H), contains 40% of 19 $\beta$ ,28-epoxy-1,28-dioxo-1,3-seco-2-nor-18 $\alpha$ -oleanan-3-oic acid (**30**) ( $\delta$  9.58 (s, 0.4H)).  $^{13}\text{C}$  NMR (75 MHz,  $\text{CDCl}_3$ ):  $\delta$  179.73, 178.54, 100.43, 85.95, 46.64, 46.10, 42.51, 40.68, 40.39, 40.26, 40.03, 39.44, 36.03, 33.56, 32.29, 32.12,

31.91, 29.71, 28.72, 27.85, 26.02, 25.46, 23.93, 23.44, 20.95, 18.67, 15.33, 14.17, 13.67. HRMS (ESI):  $m/z$  495.3093 ( $[M+Na]^+$   $C_{29}H_{44}NaO_5^+$  requires 495.3081).

#### Methyl 1-oxo-1,3-seco-2-norlupan-3-oate (36)

1 $\alpha$ -Hydroxy-2-oxa-2-norlup-20-en-3-one (31) (50.0 mg, 113.0 mmol) was dissolved ethyl ether (3 ml). Ethereal diazomethane (3 ml, ~0.02 g/ml) was added to form yellow solution. Mixture was stirred at room temperature for 1 hr. Reaction solution was flashed with dry nitrogen<sup>1</sup> to remove diazomethane excess and evaporated in vacuum. Product was crystallized from benzene to give a titled compound (36) as a white solid (50.6 mg, 98%), m.p. 135-138 °C. <sup>1</sup>H NMR (300 MHz, CDCl<sub>3</sub>):  $\delta$  9.15 (s, 1H), 4.68 (s, 1H), 4.58 (s, 1H), 3.61 (s, 3H), 2.38 (m, 1H), 2.07 (d, 1H), 1.98-0.74 (m, 40H). <sup>13</sup>C NMR (75 MHz, CDCl<sub>3</sub>):  $\delta$  205.93, 178.38, 150.76, 109.83, 54.56, 51.96, 48.94, 48.30, 48.07, 46.64, 43.52, 43.24, 40.13, 39.86, 39.55, 38.61, 35.60, 33.25, 29.98, 27.64, 25.47, 25.02, 24.15, 23.24, 20.37, 19.51, 18.25, 15.99, 14.72, 11.88. HRMS (ESI):  $m/z$  479.3511 ( $[M+Na]^+$   $C_{30}H_{48}NaO_3^+$  requires 479.3496).

#### Methyl 1-oxo-28-hydroxy-1,3-seco-2-norlupan-3-oate (37)

1 $\alpha$ ,28-Dihydroxy-2-oxa-2-norlup-20-en-3-one (32) (50.0 mg, 109.0 mmol) was dissolved ethyl ether (3 ml). Ethereal diazomethane (3 ml, ~0.02 g/ml) was added to form yellow solution. Mixture was stirred at room temperature for 1 hr. Reaction solution was flashed with dry nitrogen<sup>1</sup> to remove diazomethane excess and evaporated in vacuum to give titled compound (37) as a white solid (50.5 mg, 98%), m.p. 136-139 °C. <sup>1</sup>H NMR (300 MHz, CDCl<sub>3</sub>):  $\delta$  9.14 (s, 1H), 4.67 (s, 1H), 4.58 (s, 1H), 3.81 (d, 1H), 3.61 (s, 3H), 3.35 (d, 1H), 2.38 (m, 1H), 2.07-0.80 (m, 38H). <sup>13</sup>C NMR (75 MHz, CDCl<sub>3</sub>):  $\delta$  205.60, 178.09, 150.02, 109.92, 60.42, 54.26, 51.71, 48.69, 48.49, 47.74, 47.63, 46.37, 43.13, 39.69, 39.27, 37.61, 33.90, 32.94, 29.63, 28.93, 26.99, 25.22, 24.83, 23.90, 22.88, 20.09, 19.03, 15.73, 14.67, 11.62. HRMS (ESI):  $m/z$  495.3459 ( $[M+Na]^+$   $C_{30}H_{48}NaO_4^+$  requires 495.3445).

#### Dimethyl 1-oxo-1,3-seco-2-norlup-20-en-3,28-dioate (38)

1 $\alpha$ -Hydroxy-2-oxa-3-oxo-2-norlup-20-en-28-oic acid (33) (50.0 mg, 105.8 mmol) was dissolved in ethyl ether (3 ml). Ethereal diazomethane (3 ml, ~0.02 g/ml) was added to form yellow solution. Mixture was stirred at room temperature for 1 hr. Reaction solution was flashed with dry nitrogen<sup>1</sup> to remove diazomethane excess and evaporated in vacuum to give titled compound (38) as a white solid (51.9 mg, 98%), m.p. 179-182 °C. <sup>1</sup>H NMR (300 MHz, CDCl<sub>3</sub>):  $\delta$  9.15 (s, 1H), 4.72 (s, 1H), 4.59 (s, 1H), 3.65 (s, 3H), 3.62 (s, 3H), 3.0 (m, 1H), 2.35-2.17 (m, 2H), 2.08-0.70 (m, 36H). <sup>13</sup>C NMR (75 MHz, CDCl<sub>3</sub>):  $\delta$  205.71, 178.13, 176.52, 150.13, 109.79, 56.47, 54.27, 51.73, 51.35, 49.11, 48.63, 46.36, 42.74, 39.42, 39.41, 38.43, 36.83, 33.00, 31.88, 30.43, 29.60, 25.12, 23.90, 22.94, 20.09, 19.30, 15.67, 14.58, 11.64. HRMS (ESI):  $m/z$  523.3388 ( $[M+Na]^+$   $C_{31}H_{48}NaO_5^+$  requires 523.3394).

#### Methyl 1-oxo-19 $\beta$ ,28-epoxy-1,3-seco-2-nor-18 $\alpha$ -oleanan-3-oate (39)

19 $\beta$ ,28-Epoxy-1 $\alpha$ -hydroxy-2-oxa-2-nor-18 $\alpha$ -oleanan-3-one (34) (50.0 g, 109.0 mmol) was dissolved in ethyl ether (3 ml). Ethereal diazomethane (3 ml, ~0.02 g/ml) was added to form yellow solution. Mixture was stirred at room temperature for 1 hr. Reaction solution was flashed with dry nitrogen to remove diazomethane excess and evaporated in vacuum to give titled compound (39) as white solid (50.5 g, 98%), m.p. 118-122 °C. <sup>1</sup>H NMR (300 MHz, CDCl<sub>3</sub>):  $\delta$  9.15 (s, 1H), 3.72 (d, 1H), 3.59 (s, 3H), 3.45 (s, 1H), 3.41 (d, 1H), 2.08 (d, 1H), 1.76 (d, 1H), 1.70-0.70 (m, 39H). <sup>13</sup>C NMR (75 MHz, CDCl<sub>3</sub>):  $\delta$  205.93, 178.34, 88.06, 71.45, 54.59, 51.88, 49.05, 46.84, 46.62, 41.72, 41.70, 39.61, 39.59, 36.53, 36.51, 34.75, 32.84, 28.99, 26.68, 26.67, 26.66, 26.36, 26.36, 24.77, 22.89, 24.55, 20.33, 15.86, 13.70, 12.18. HRMS (ESI):  $m/z$  495.3449 ( $[M+Na]^+$   $C_{30}H_{48}NaO_4^+$  requires 495.3445).

#### Methyl 19 $\beta$ ,28-epoxy-1,28-dioxo-1,3-seco-2-nor-18 $\alpha$ -oleanan-3-oate (40)

1 $\alpha$ -Hydroxy-2-oxa-3-oxo-2-nor-18 $\alpha$ -oleanan-28,19 $\beta$ -olide (35) (0.21 g, 0.44 mmol) was suspended in chloroform (9 ml). Ethereal diazomethane (15 ml, ~0.02 g/ml) was added to form yellow solution. Mixture was stirred at room temperature for 1 hr. Reaction solution was flashed with dry nitrogen<sup>1</sup> to remove diazomethane excess and evaporated in vacuum to give titled compound (40) as white solid (0.20 g, 91%), m.p. 276-279 °C decomp. <sup>1</sup>H NMR (300 MHz, CDCl<sub>3</sub>):  $\delta$  9.17 (s, 1H), 3.91 (s, 1H), 3.60 (s, 3H), 2.09-0.94 (m, 41H). <sup>13</sup>C NMR



(75 MHz, CDCl<sub>3</sub>): δ 202.52, 179.59, 178.01, 85.78, 54.28, 51.72, 48.80, 46.47, 46.31, 46.11, 40.29, 39.95, 39.29, 36.33, 33.55, 32.39, 32.27, 31.85, 28.67, 27.85, 25.96, 25.39, 25.32, 23.90, 23.81, 22.73, 19.95, 15.43, 13.56, 11.95.  
HRMS (ESI): *m/z* 509.3249 ([M+Na<sup>+</sup>] C<sub>30</sub>H<sub>46</sub>NaO<sub>5</sub><sup>+</sup> requires 509.3238).

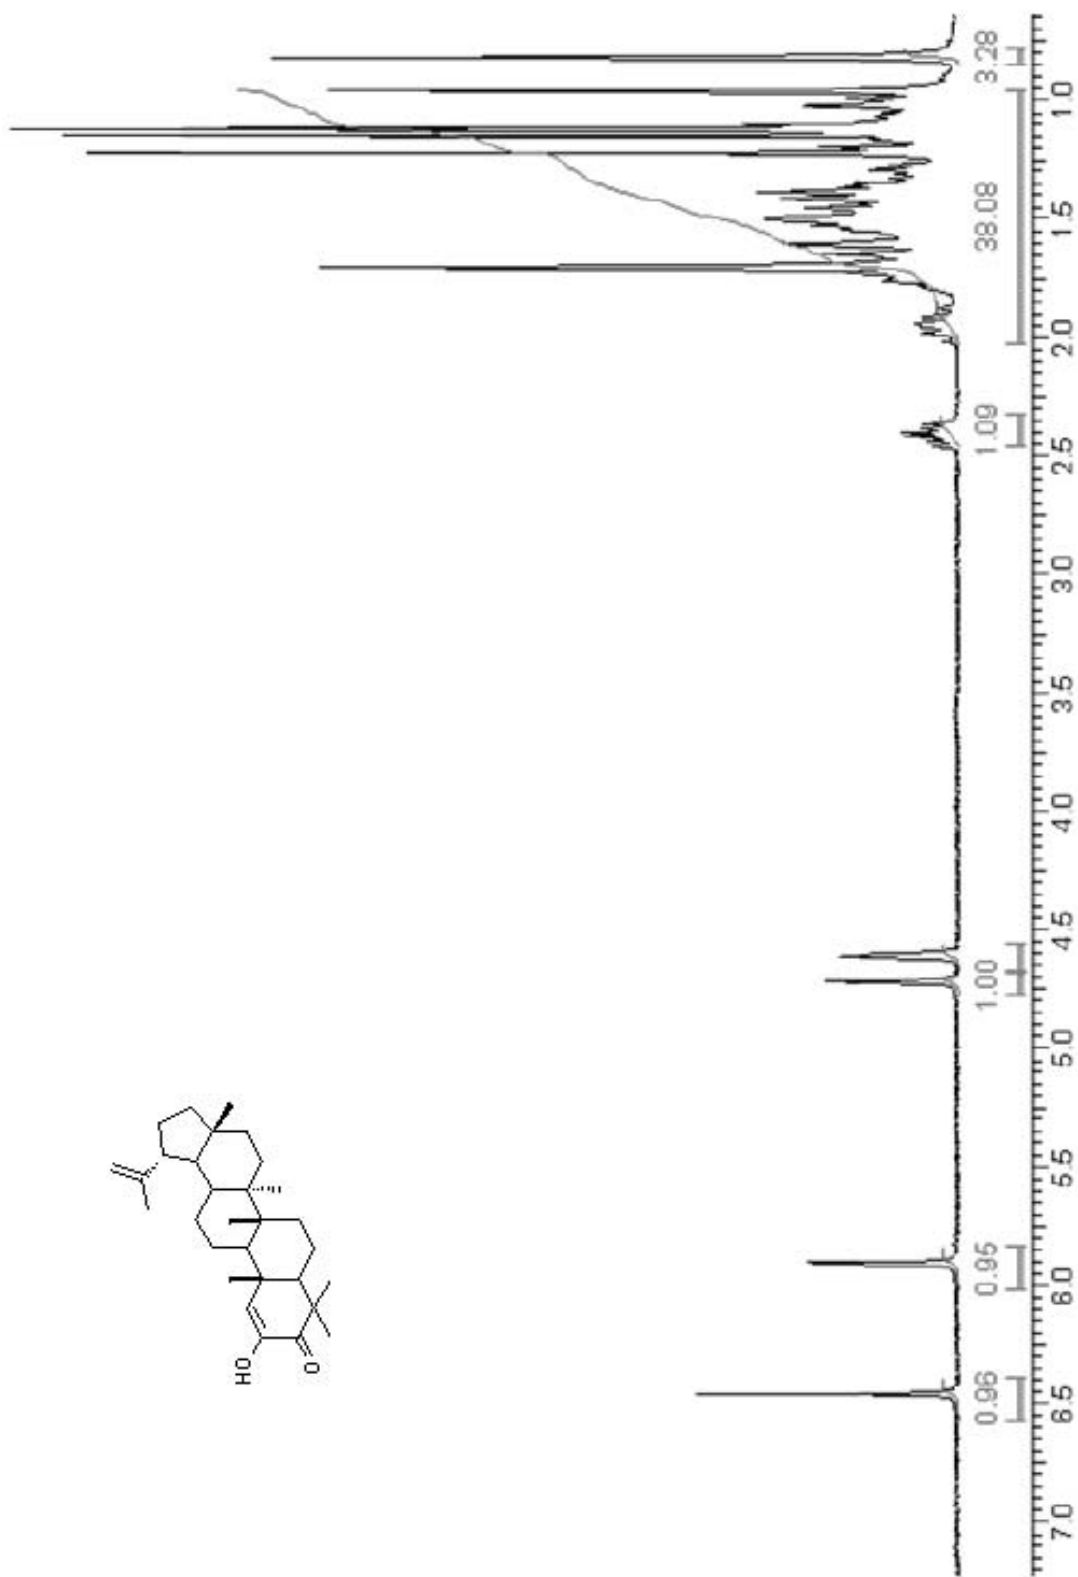

2-Hydroxylup-1,20-dien-3-one (6), CDCl<sub>3</sub>/tms

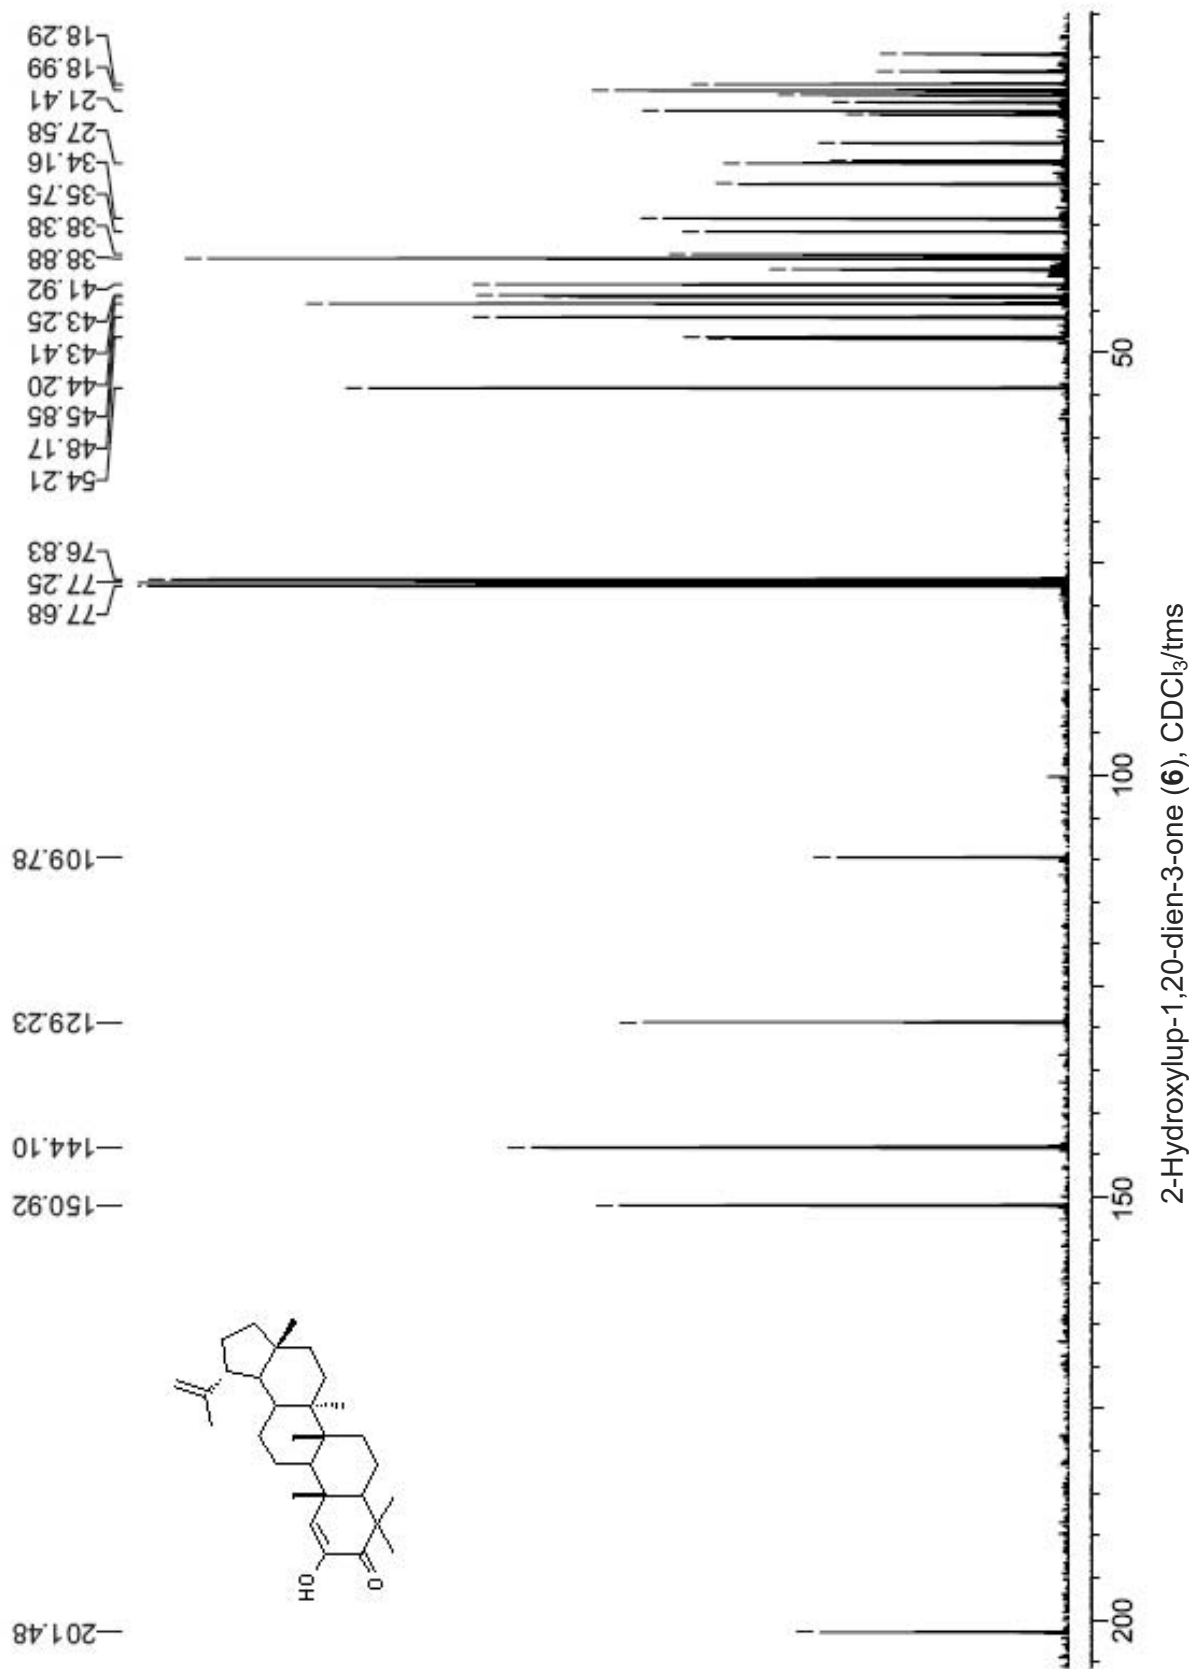

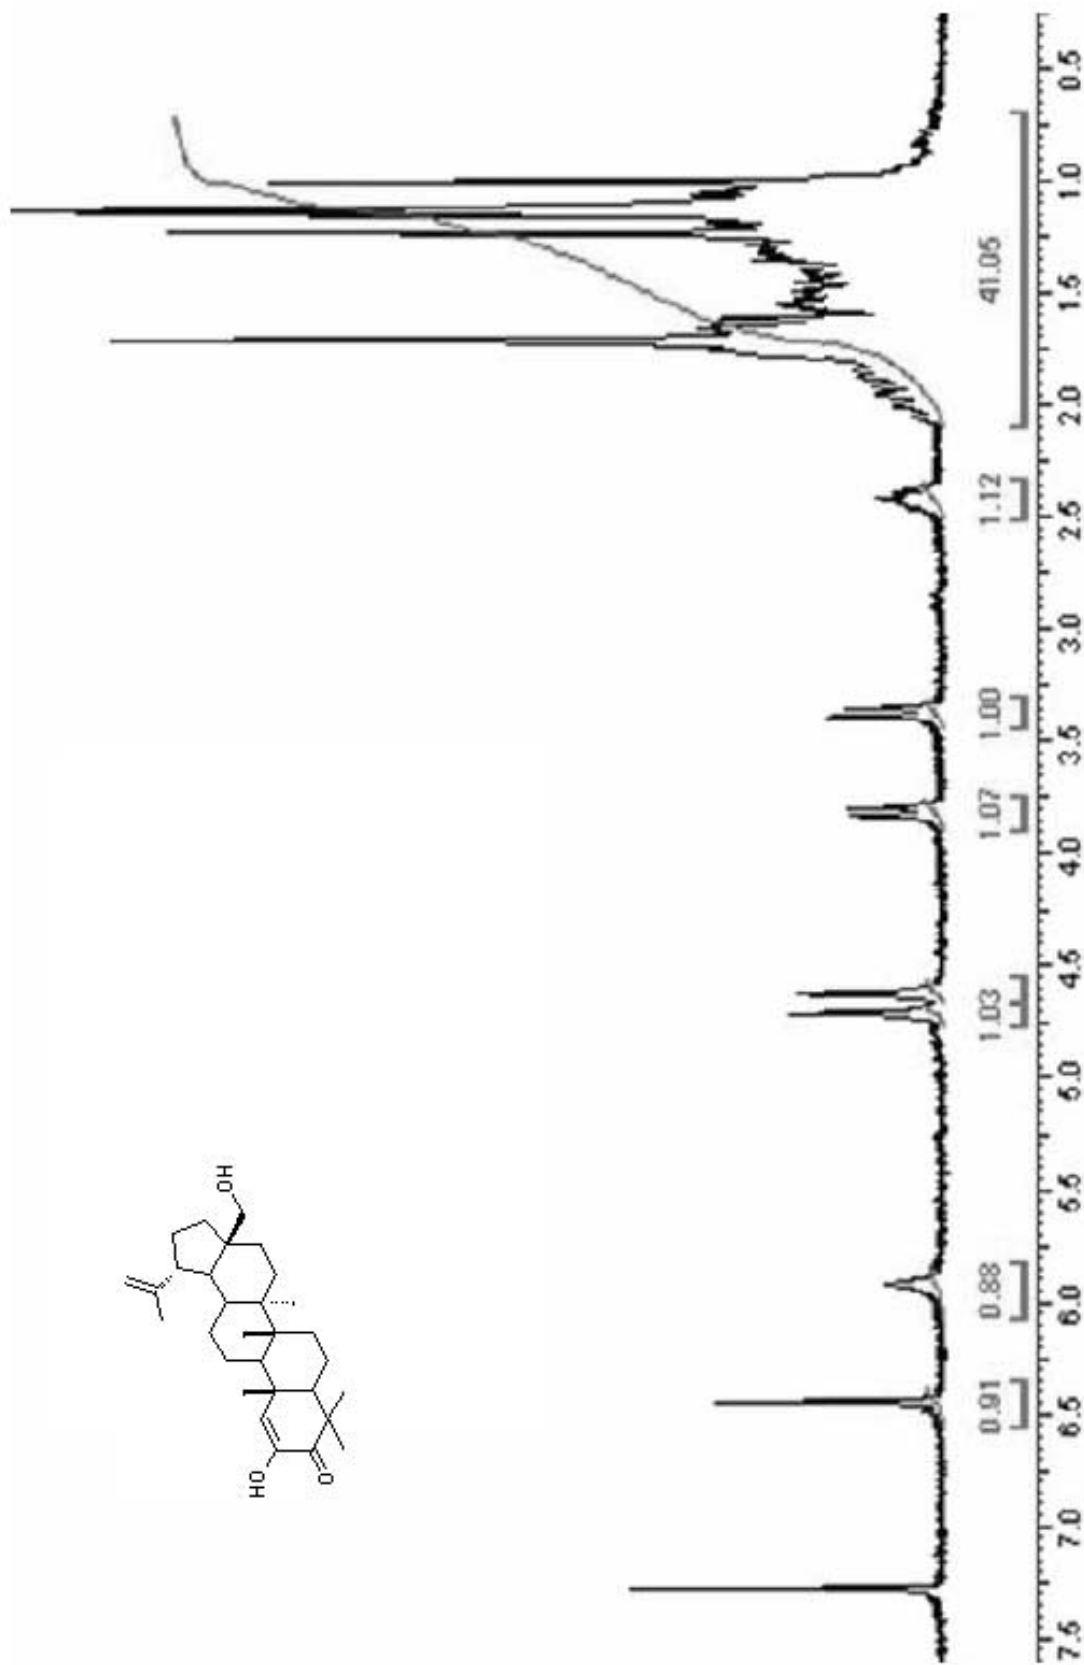

2,28-Dihydroxylup-1,20-dien-3-one (7), CDCl<sub>3</sub>/tms

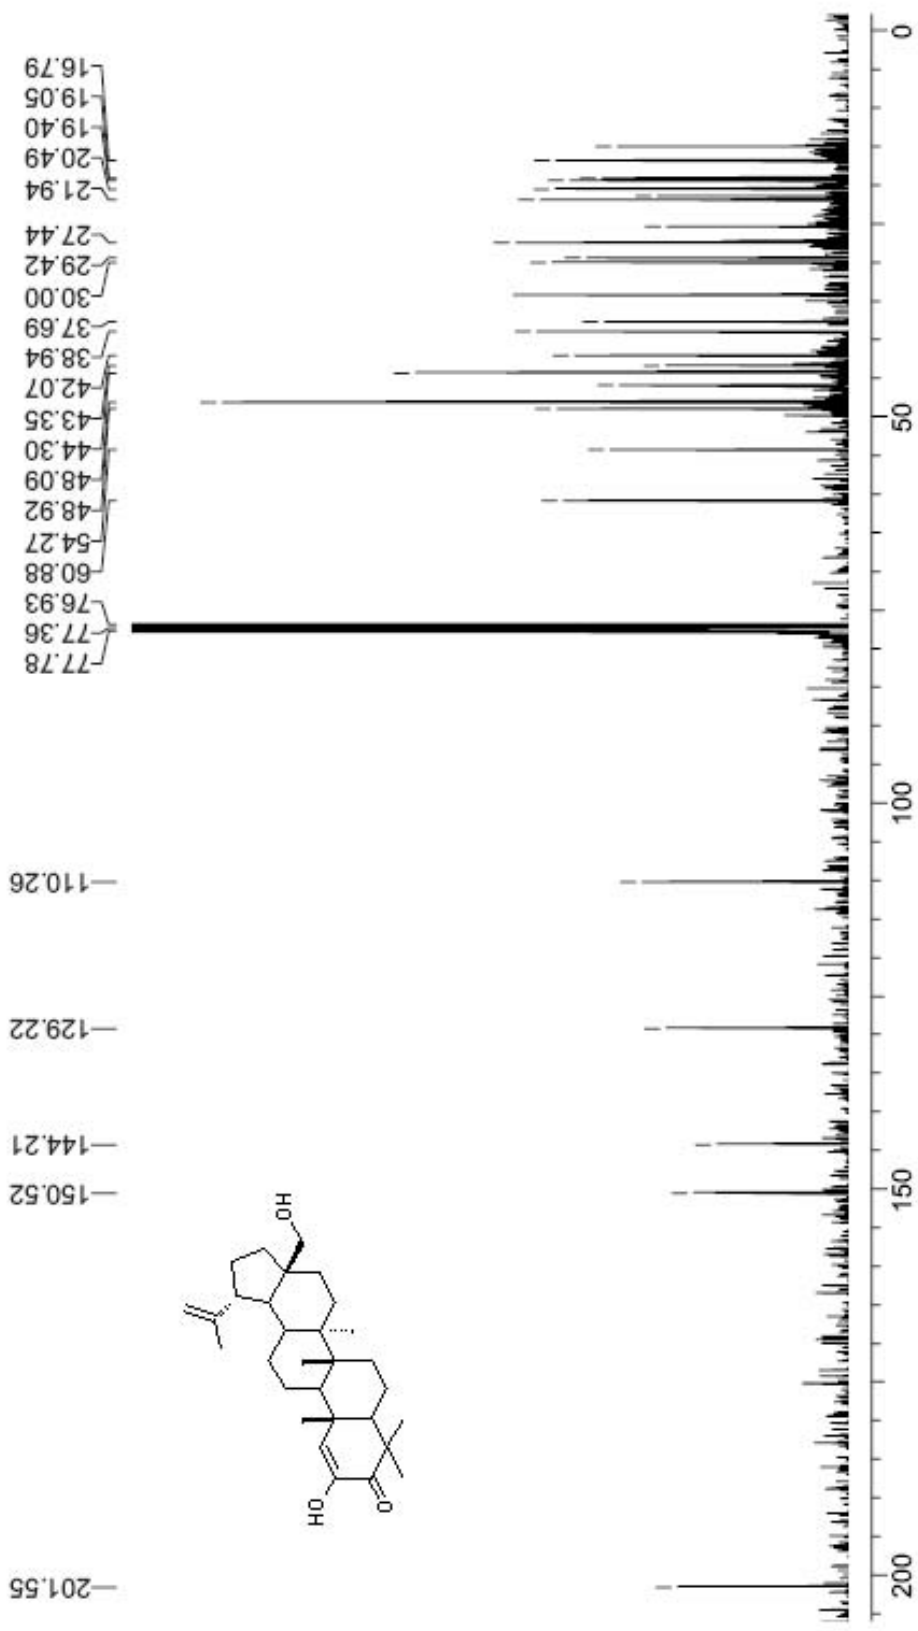

2,28-Dihydroxylup-1,20-dien-3-one (7), CDCl<sub>3</sub>/tms

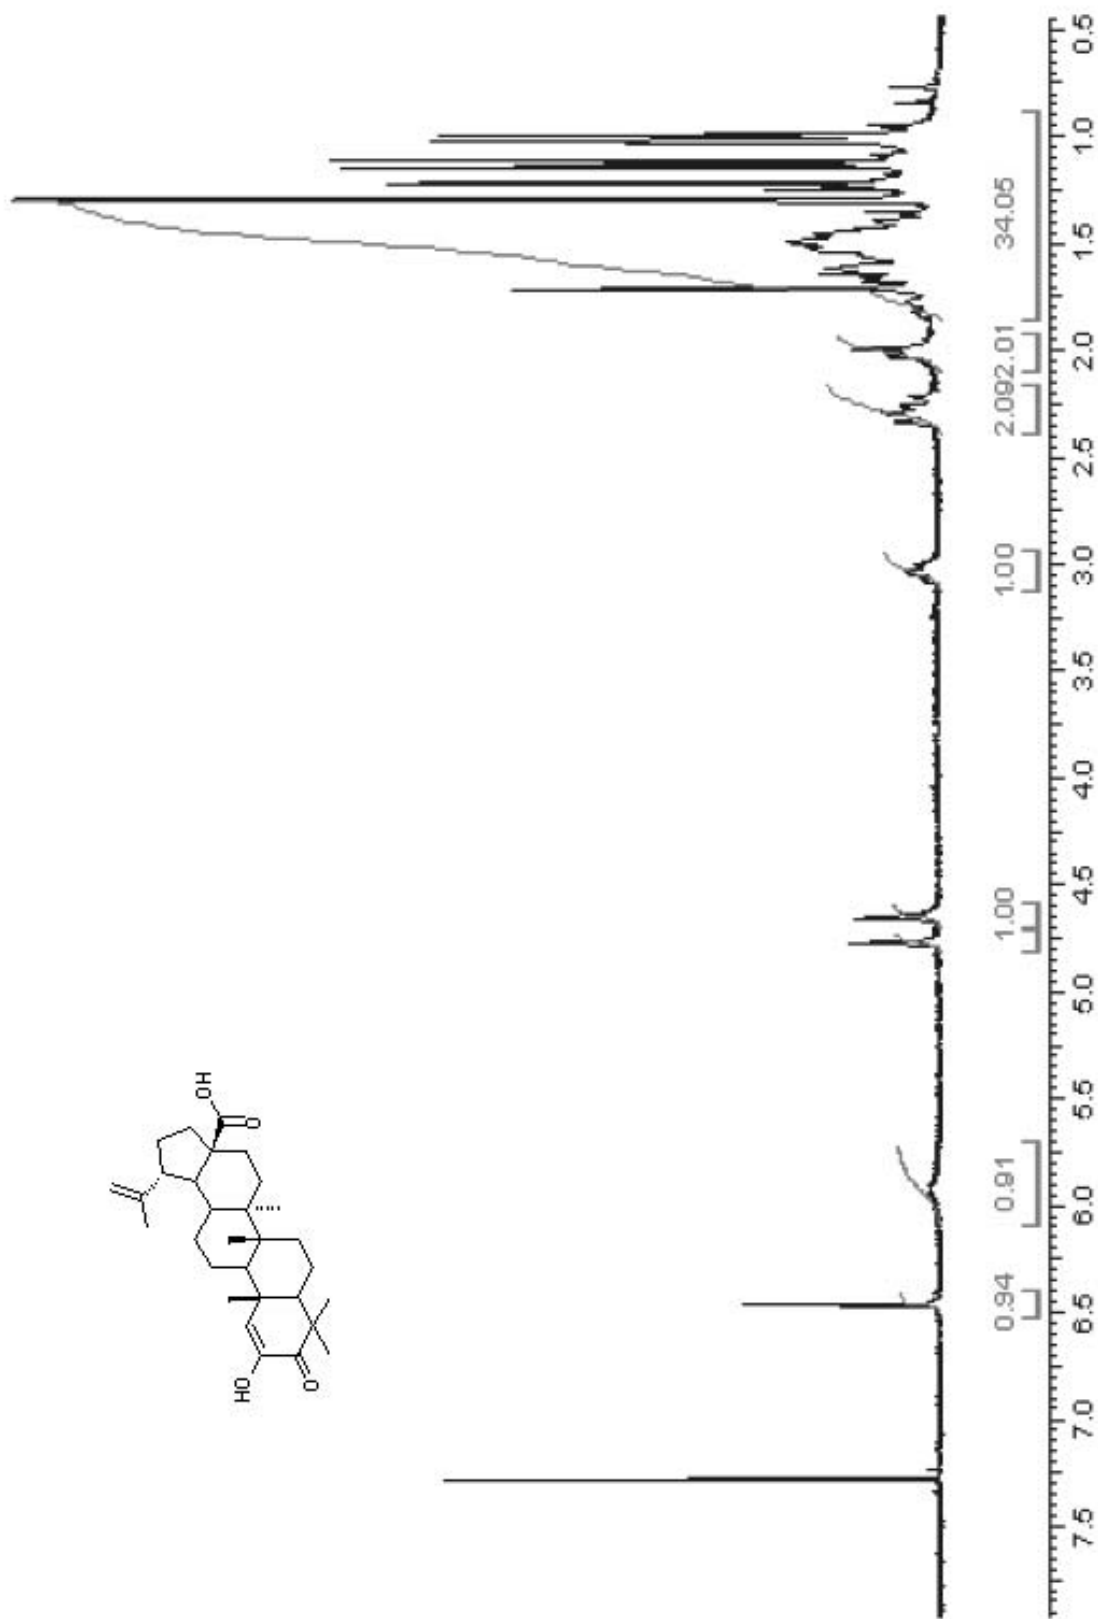

2-Hydroxy-3-oxolup-1,20-dien-28-oic acid (**8**), CDCl<sub>3</sub>/tms

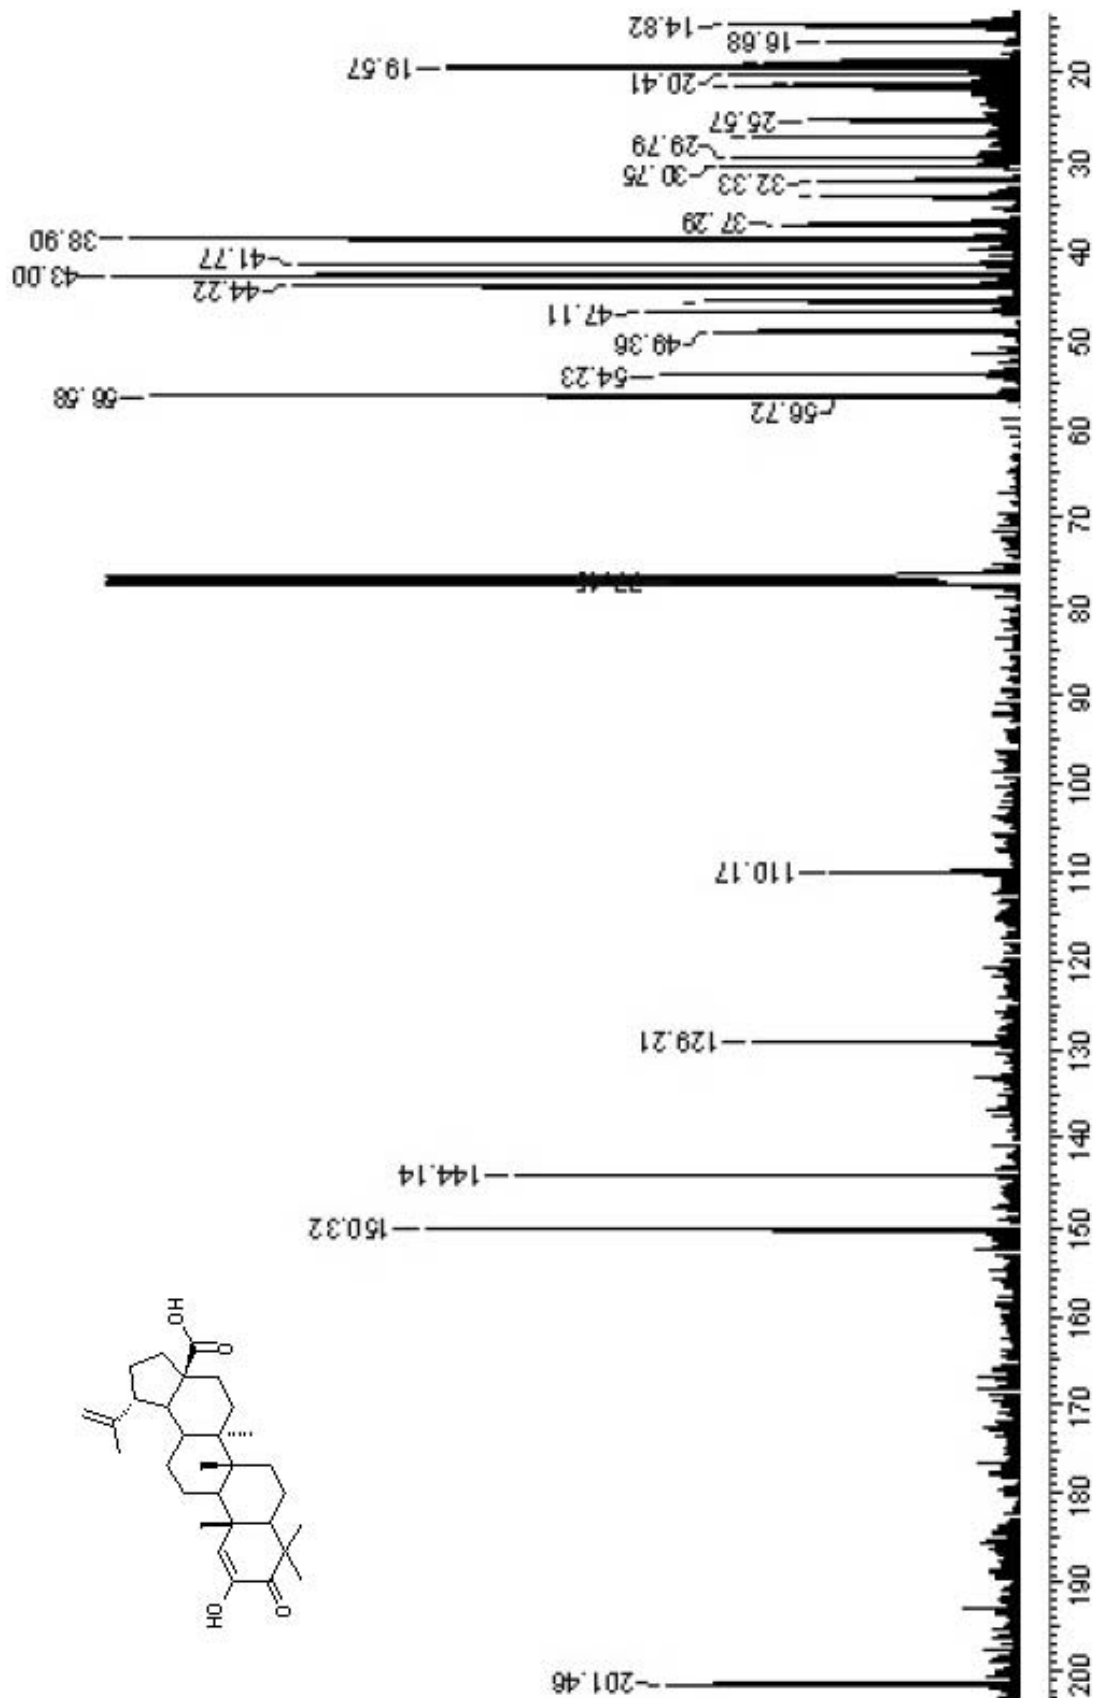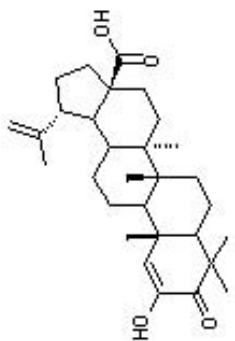

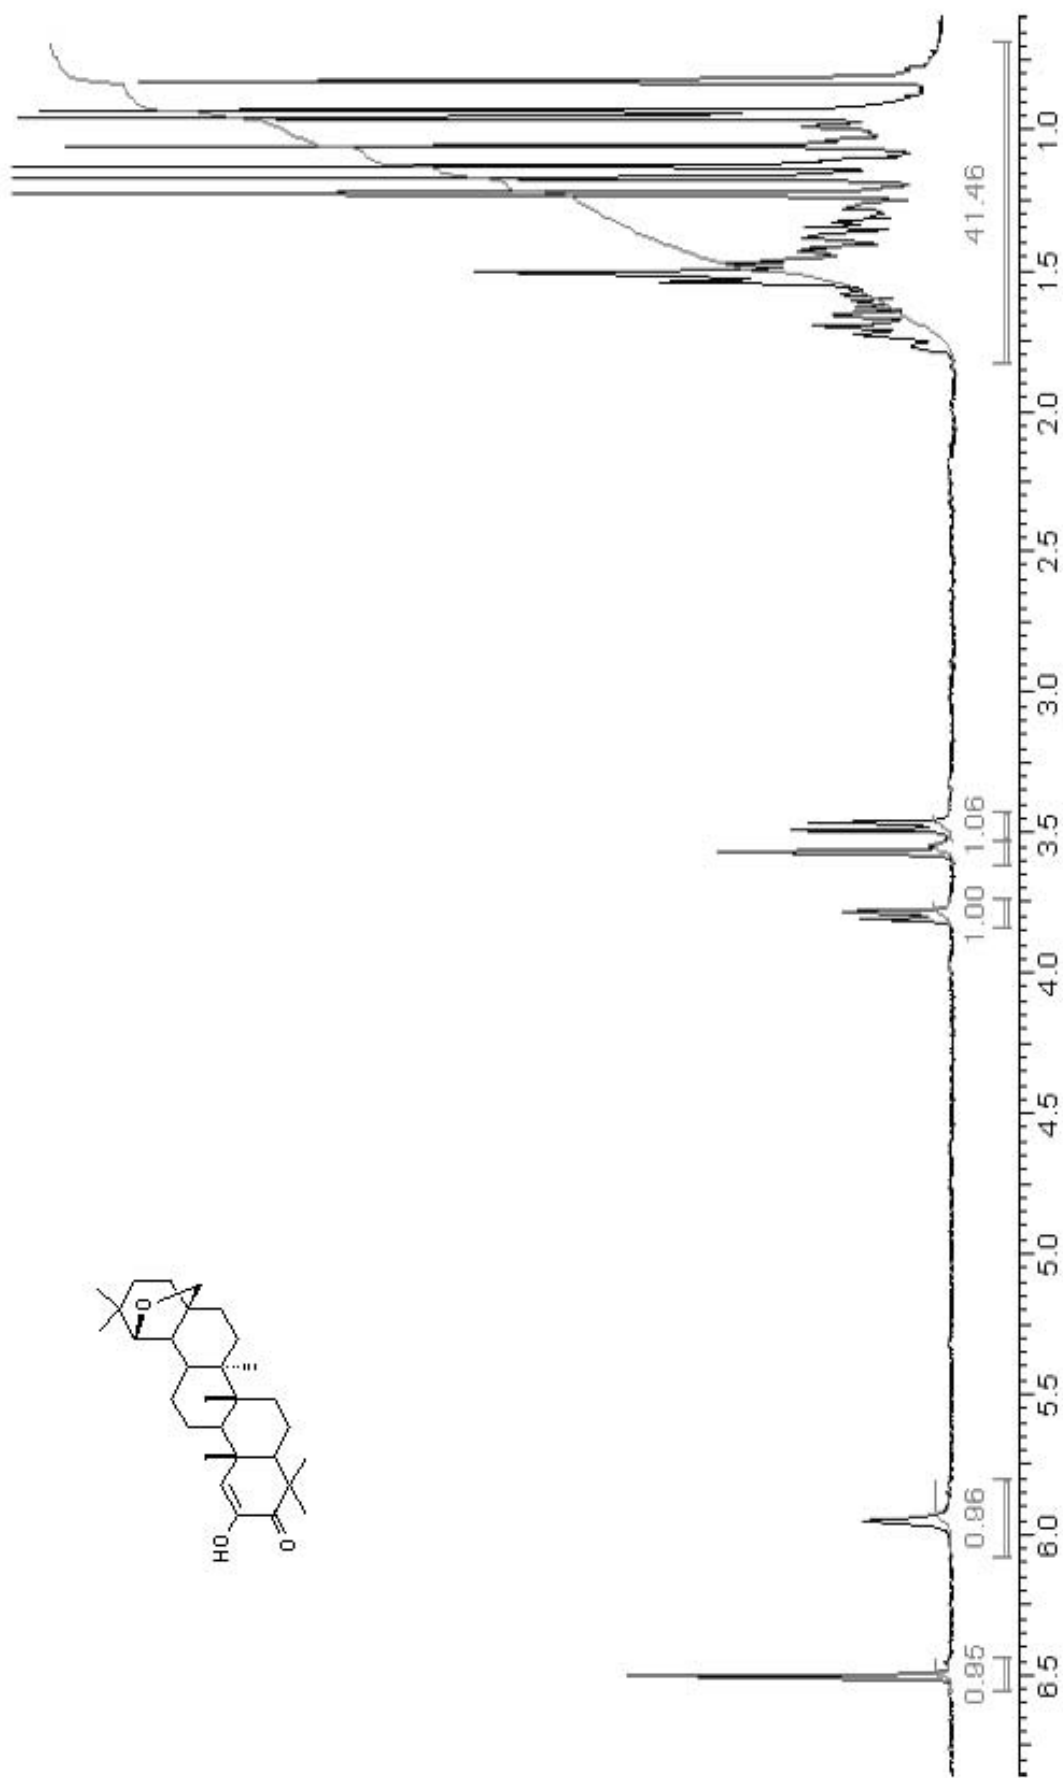

2-Hydroxy-19β,28-epoxy-18α-clean-1-en-3-one (**9**), CDCl<sub>3</sub>/tms



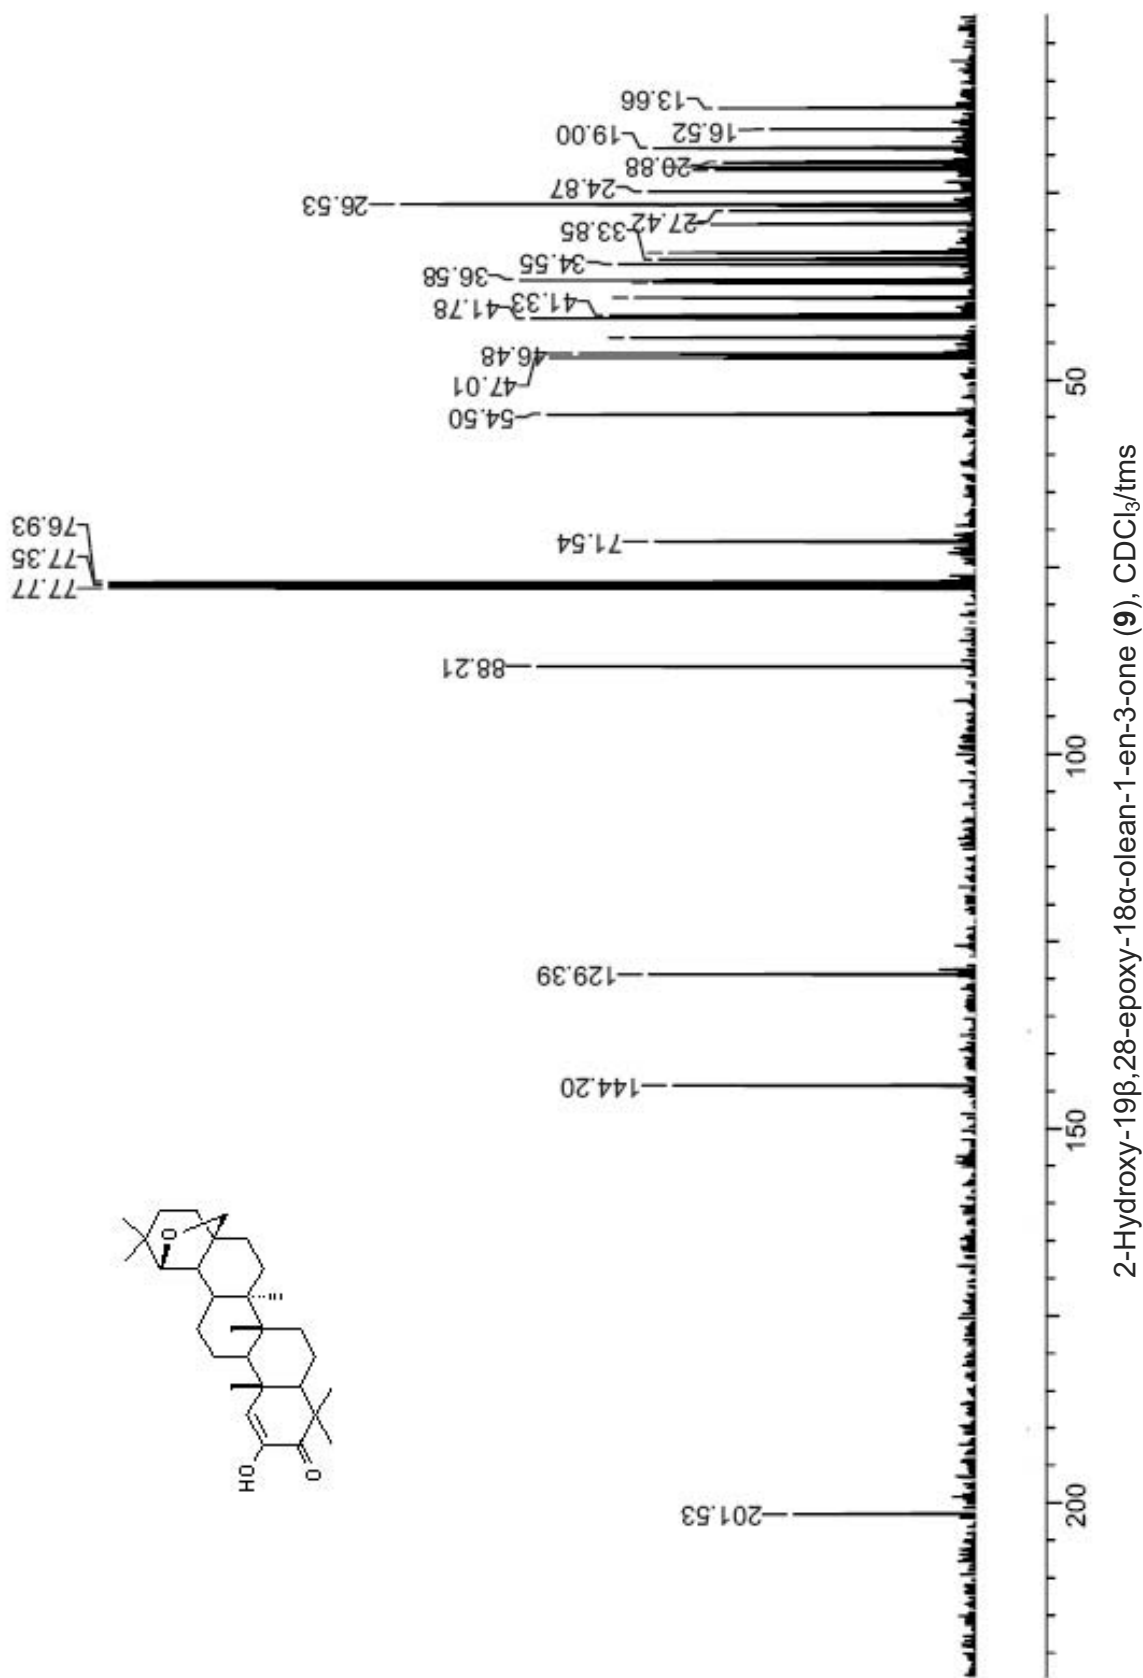

1.979  
1.900  
1.886  
1.844  
1.807  
1.542  
1.529  
1.489  
1.447  
1.418  
1.408  
1.375  
1.276  
1.270  
1.194  
1.172  
1.098  
0.981  
0.972  
0.876

3.961

5.929

6.474

7.286

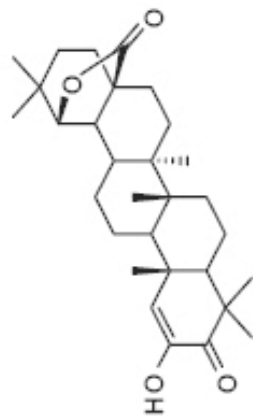

41.00

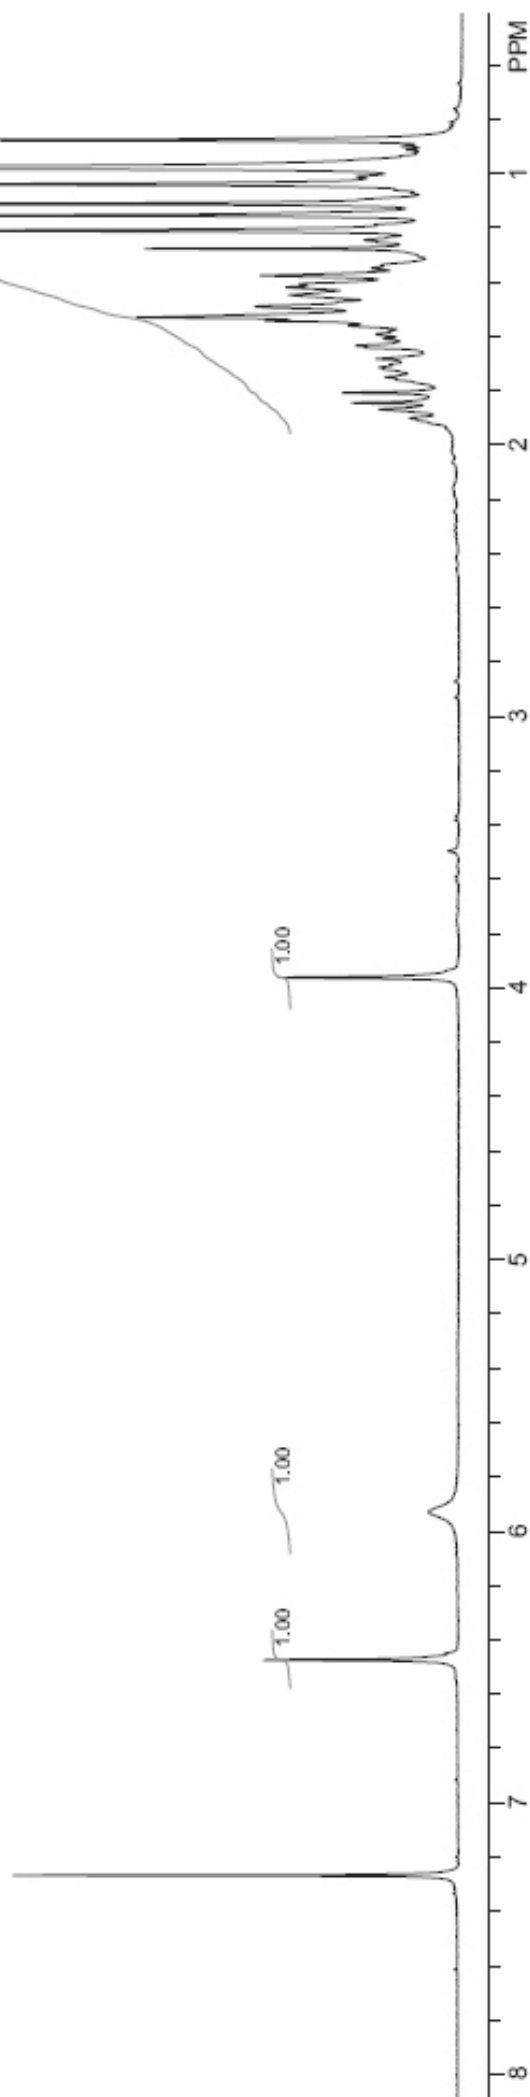

2-Hydroxy-3-oxo-18 $\alpha$ -olean-1-en-28,19 $\beta$ -olide (**10**), CDCl<sub>3</sub>/tms

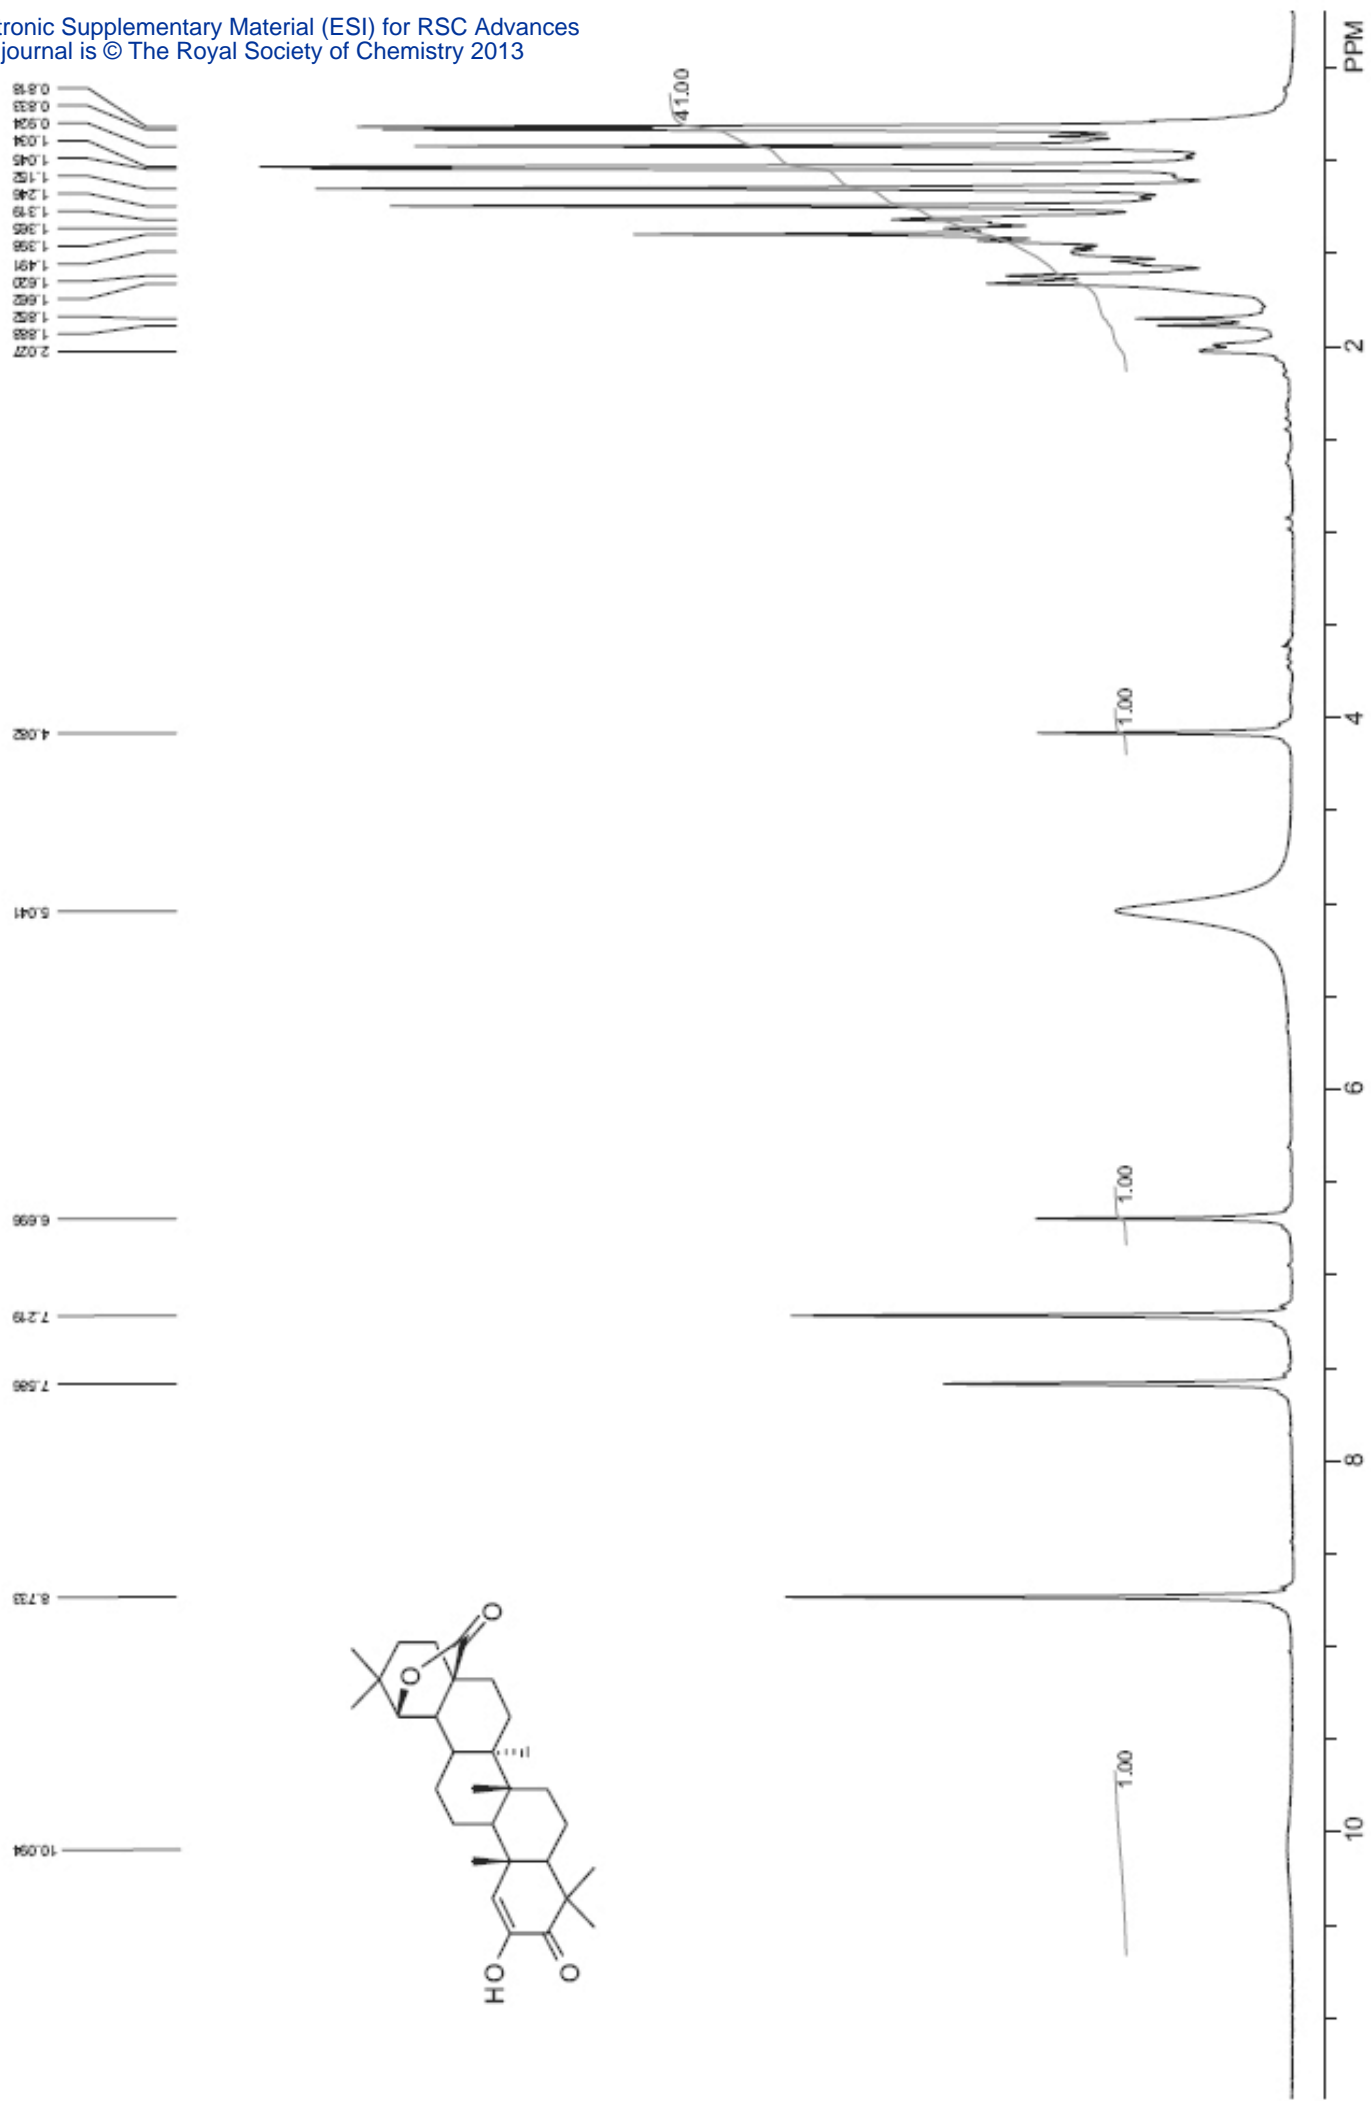

2-Hydroxy-3-oxo-18α-olean-1-en-28,19β-olide (**10**), Py-d<sub>5</sub>/tms

0.000  
13.001  
15.896  
19.007  
21.042  
21.365  
21.885  
23.606  
25.972  
26.400  
27.824  
28.129  
28.783  
32.011  
32.721  
33.571  
33.712  
36.575  
38.711  
40.435  
41.406  
44.791  
46.185  
46.717  
46.717  
54.282

85.757

100.000

129.872

130.000

146.615

146.888

179.483

201.168

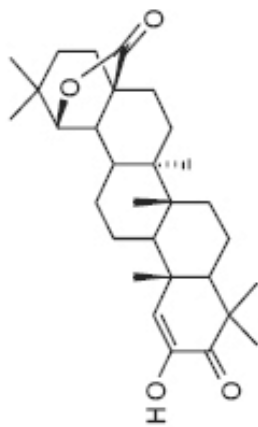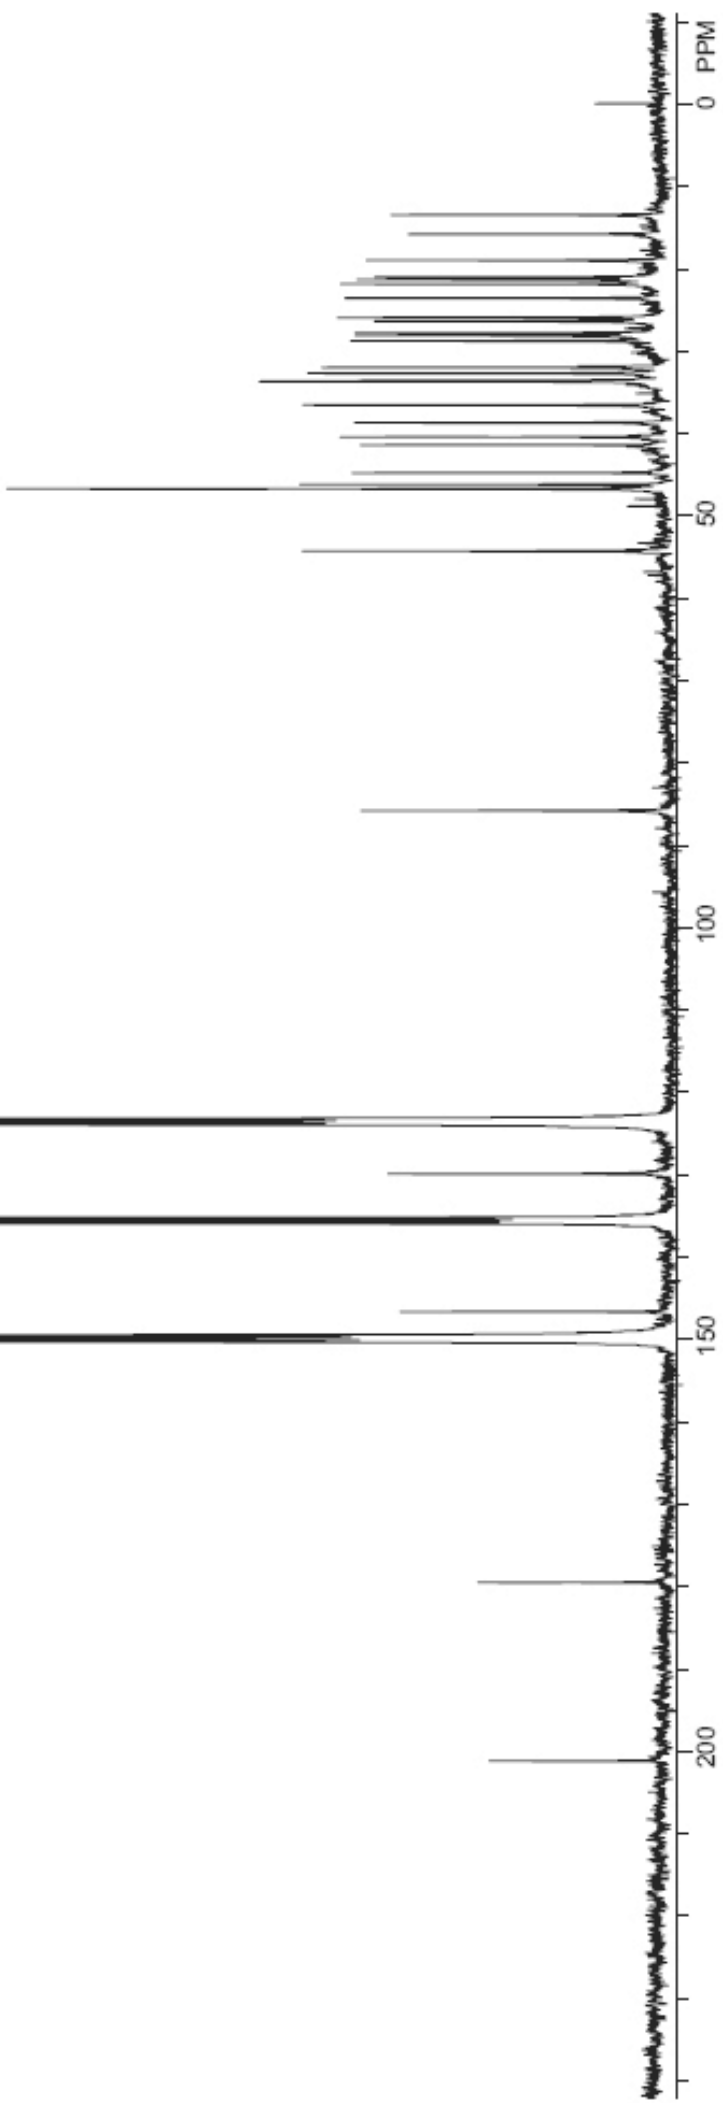

2-Hydroxy-3-oxo-18α-olean-1-en-28, 19β-olide (10), Py-d<sub>5</sub>/tms

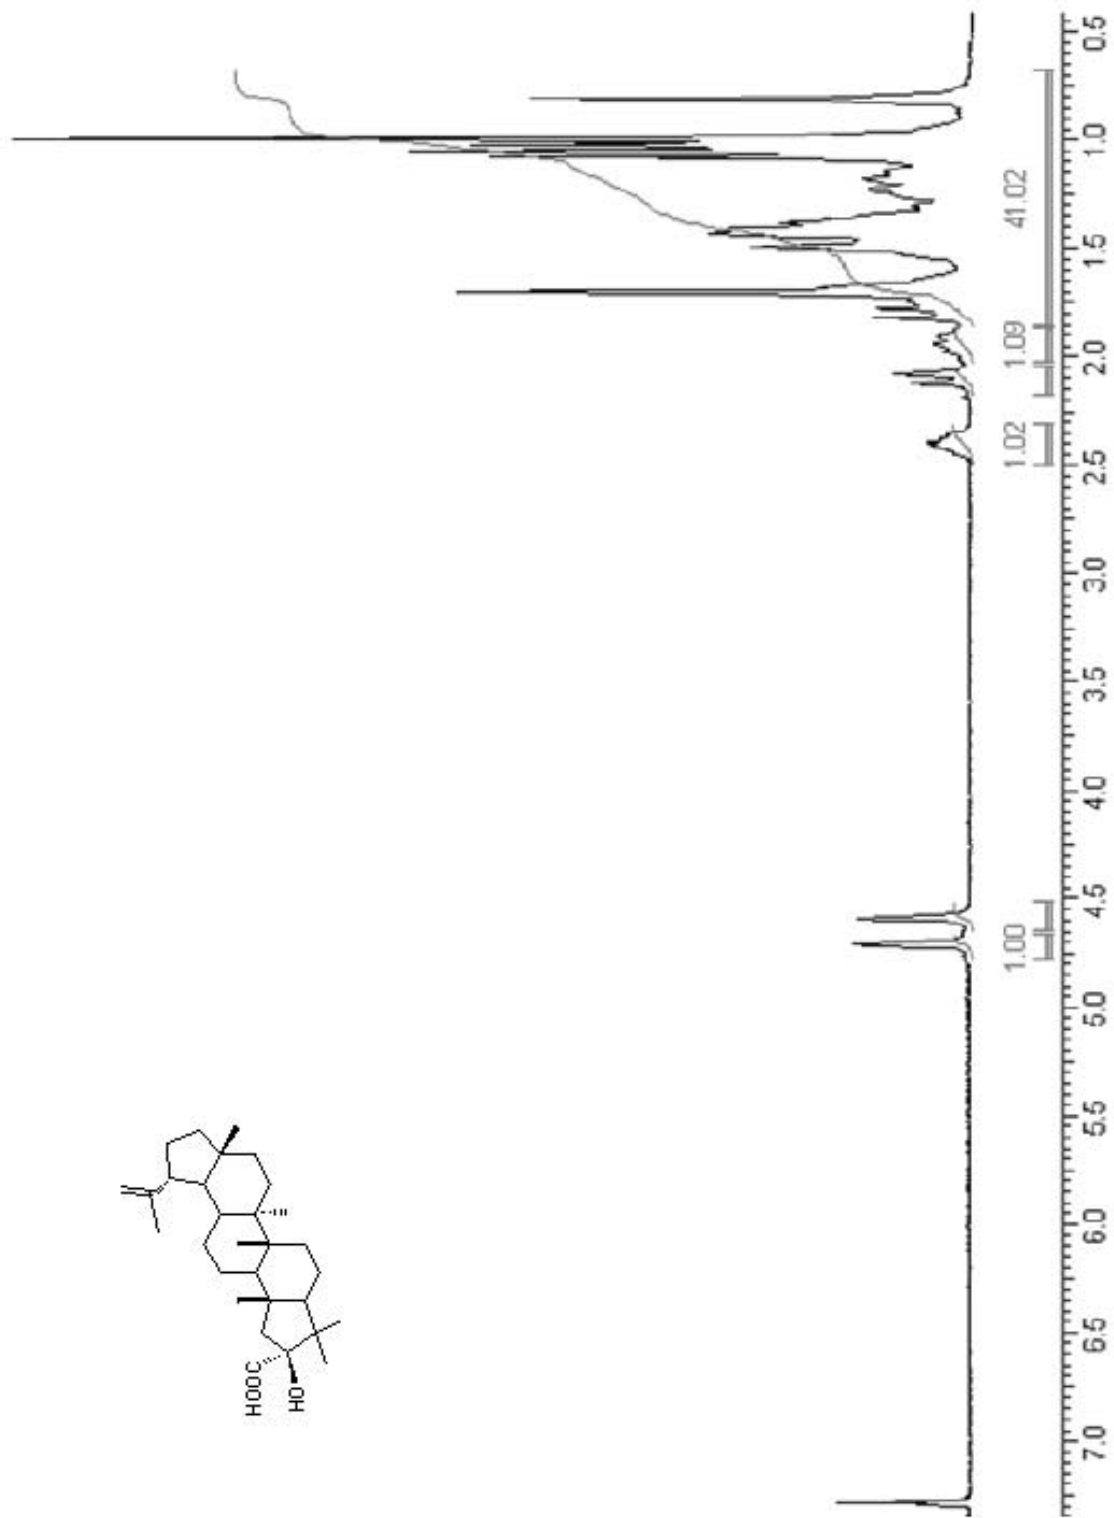

3β-Hydroxy-1(2→3)-abeolup-20-en-2-oic acid (11), CDCl<sub>3</sub>/tms

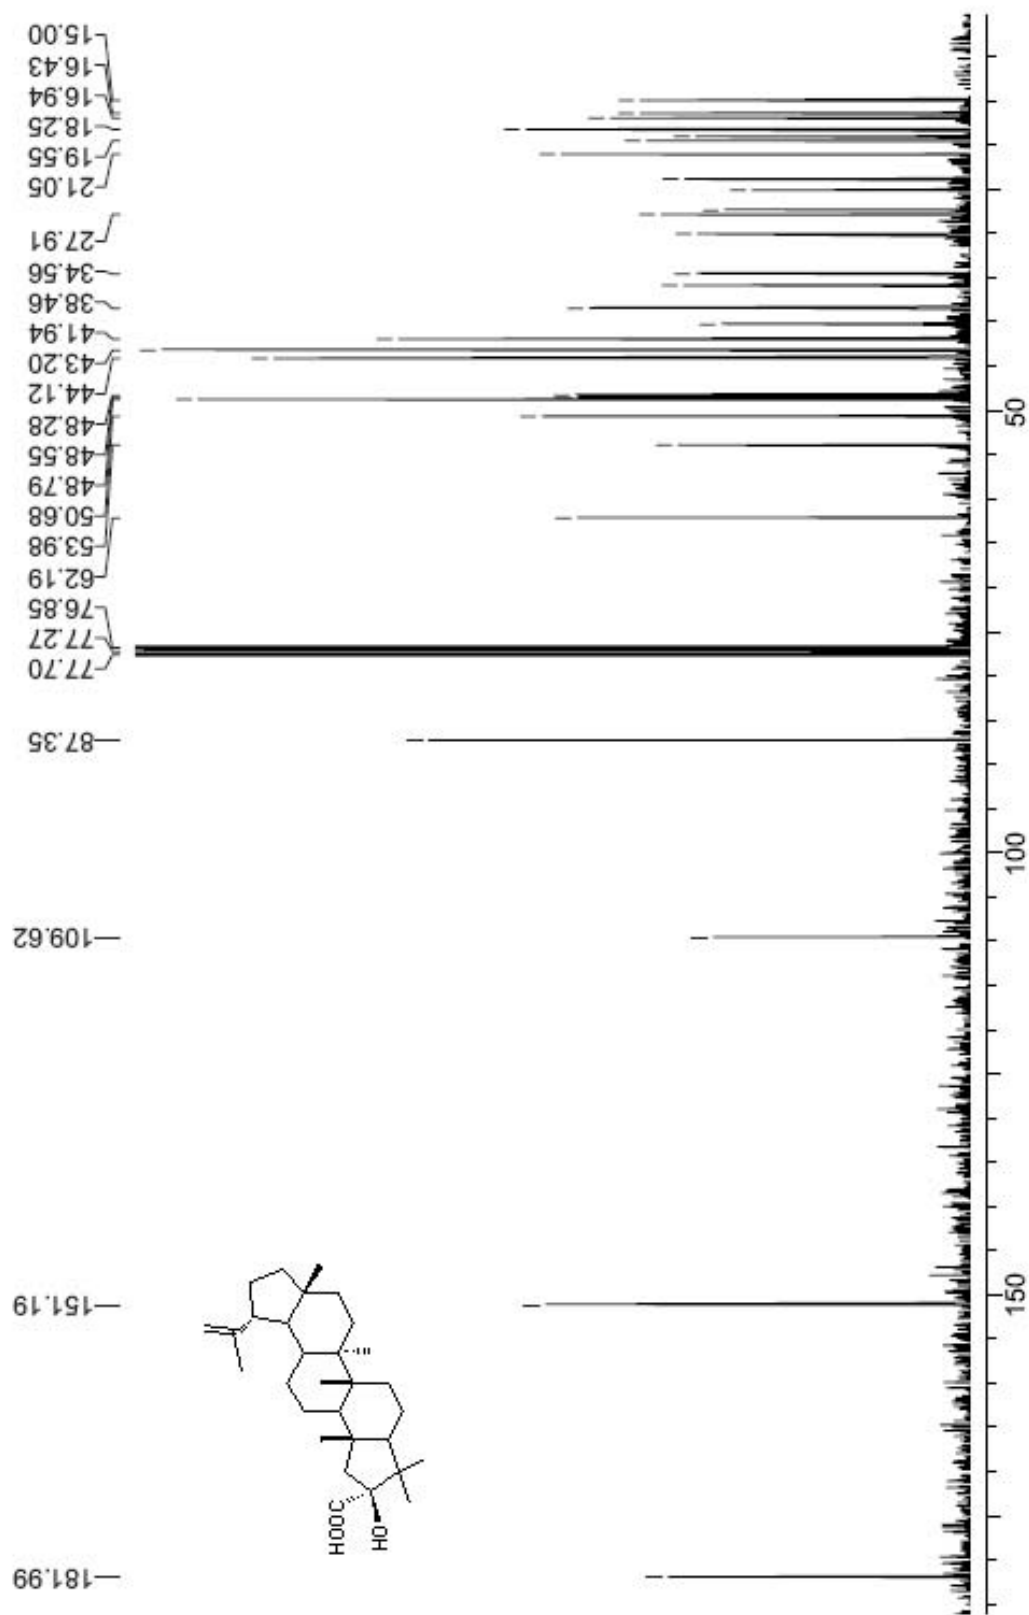

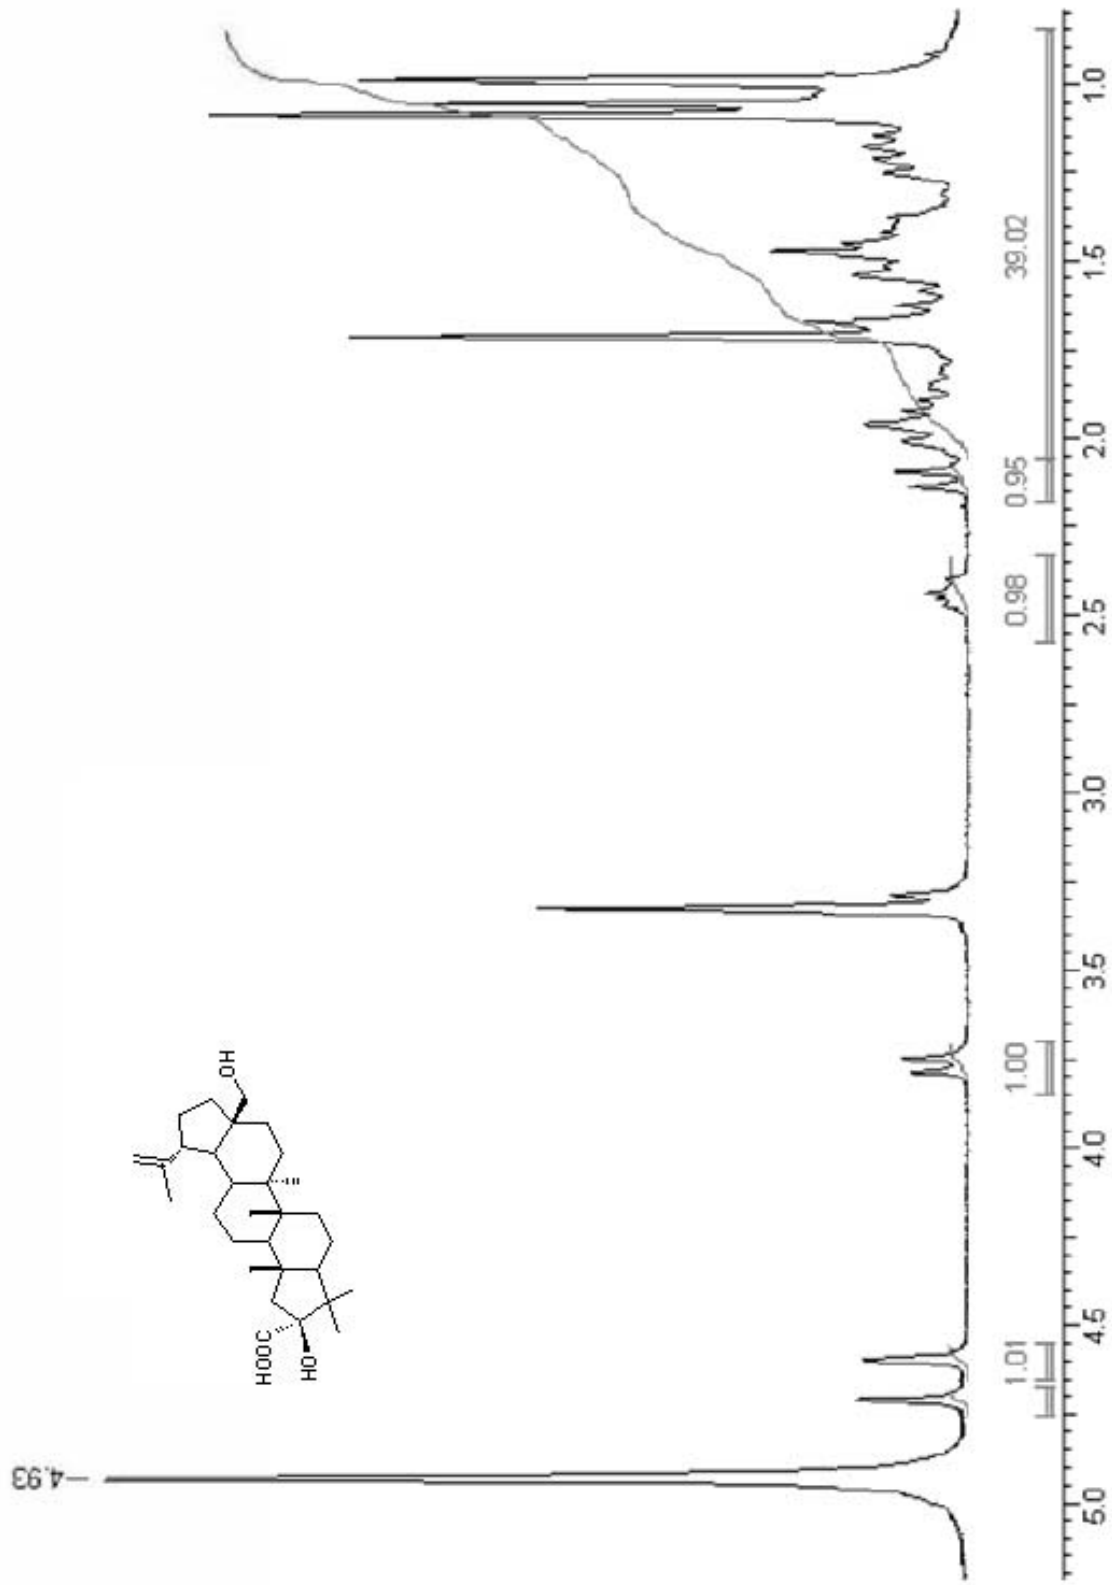

3β,28-Dihydroxy-1(2→3)-abeolup-20-en-2-oic acid (12), CD<sub>3</sub>OD/tms

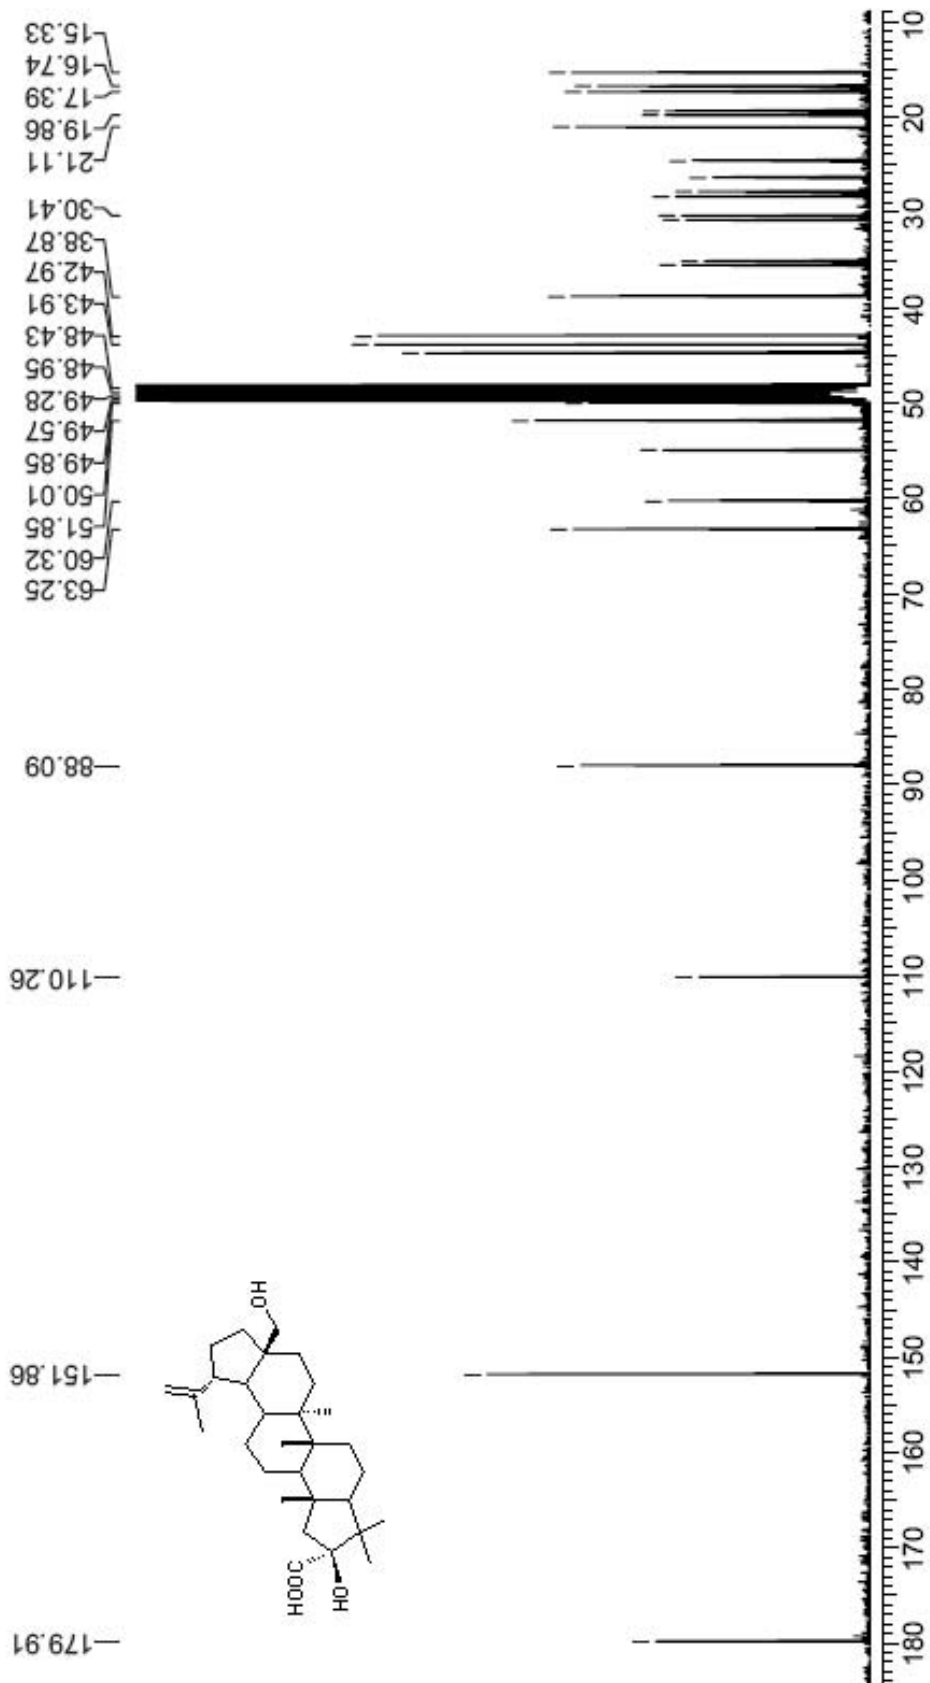

3β,28-Dihydroxy-1(2→3)-abeolup-20-en-2-oic acid (**12**), CD<sub>3</sub>OD/tms



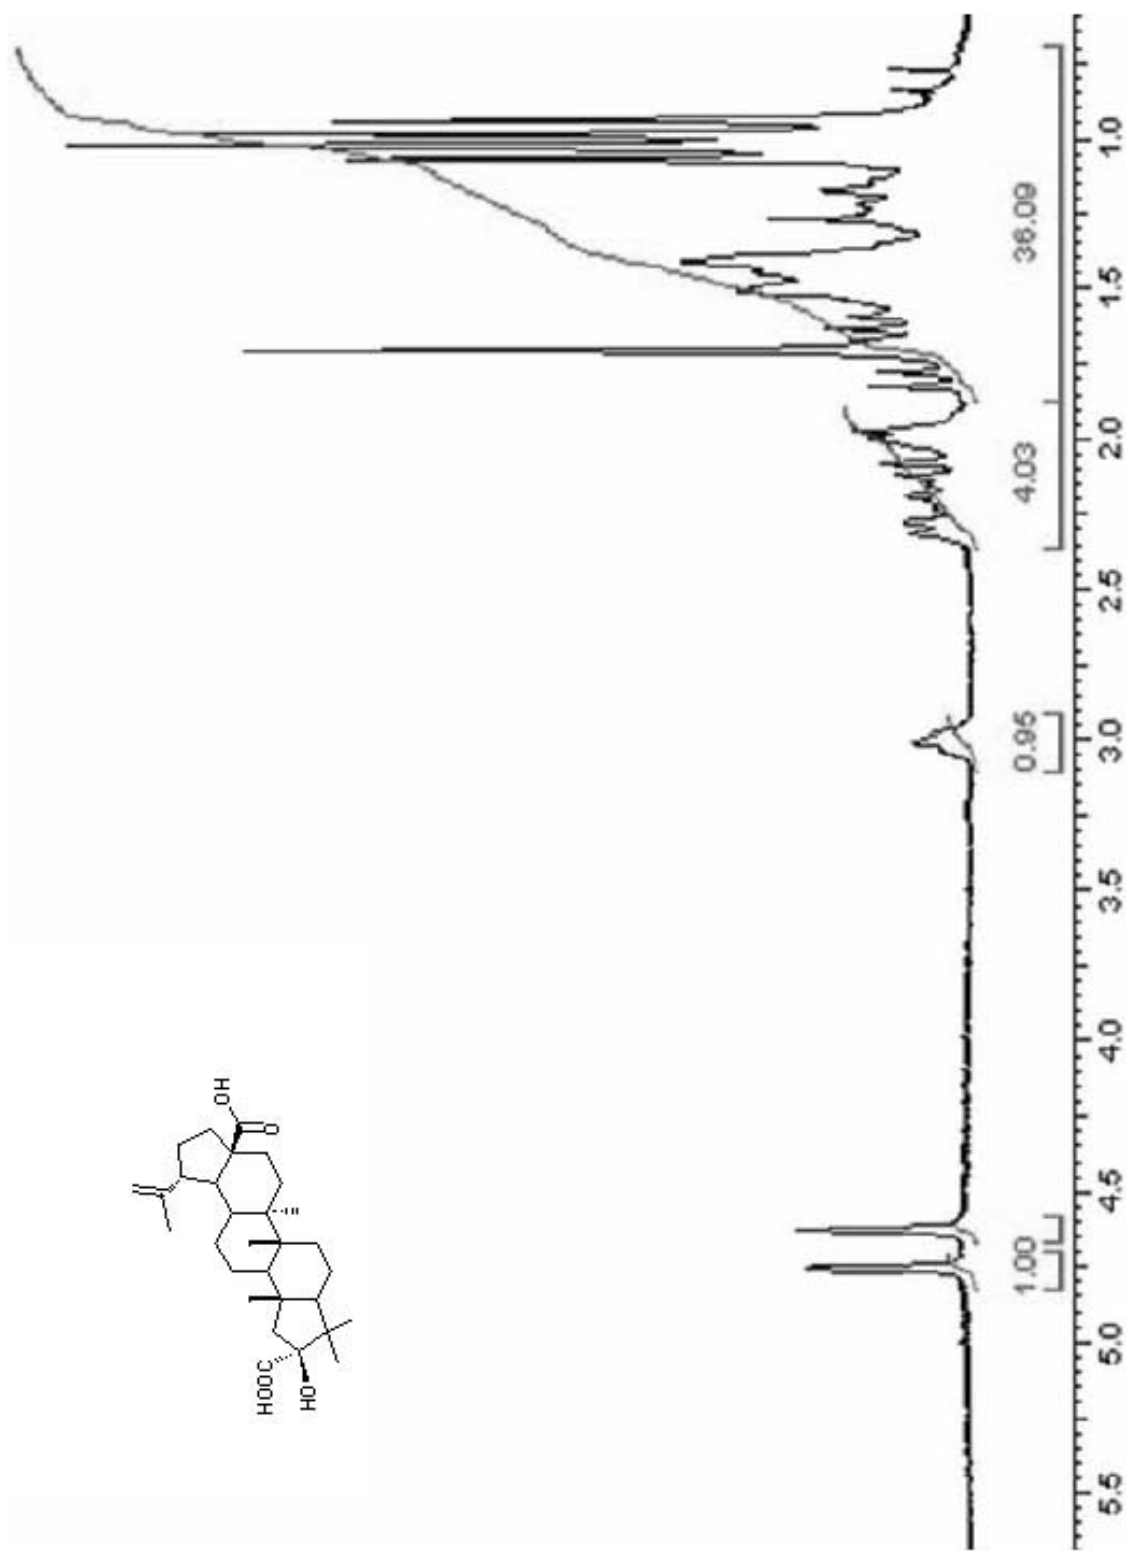

3β-Hydroxy-1(2→3)-abeolup-20-ene-2,28-dioic acid (**13**), CDCl<sub>3</sub>/tms

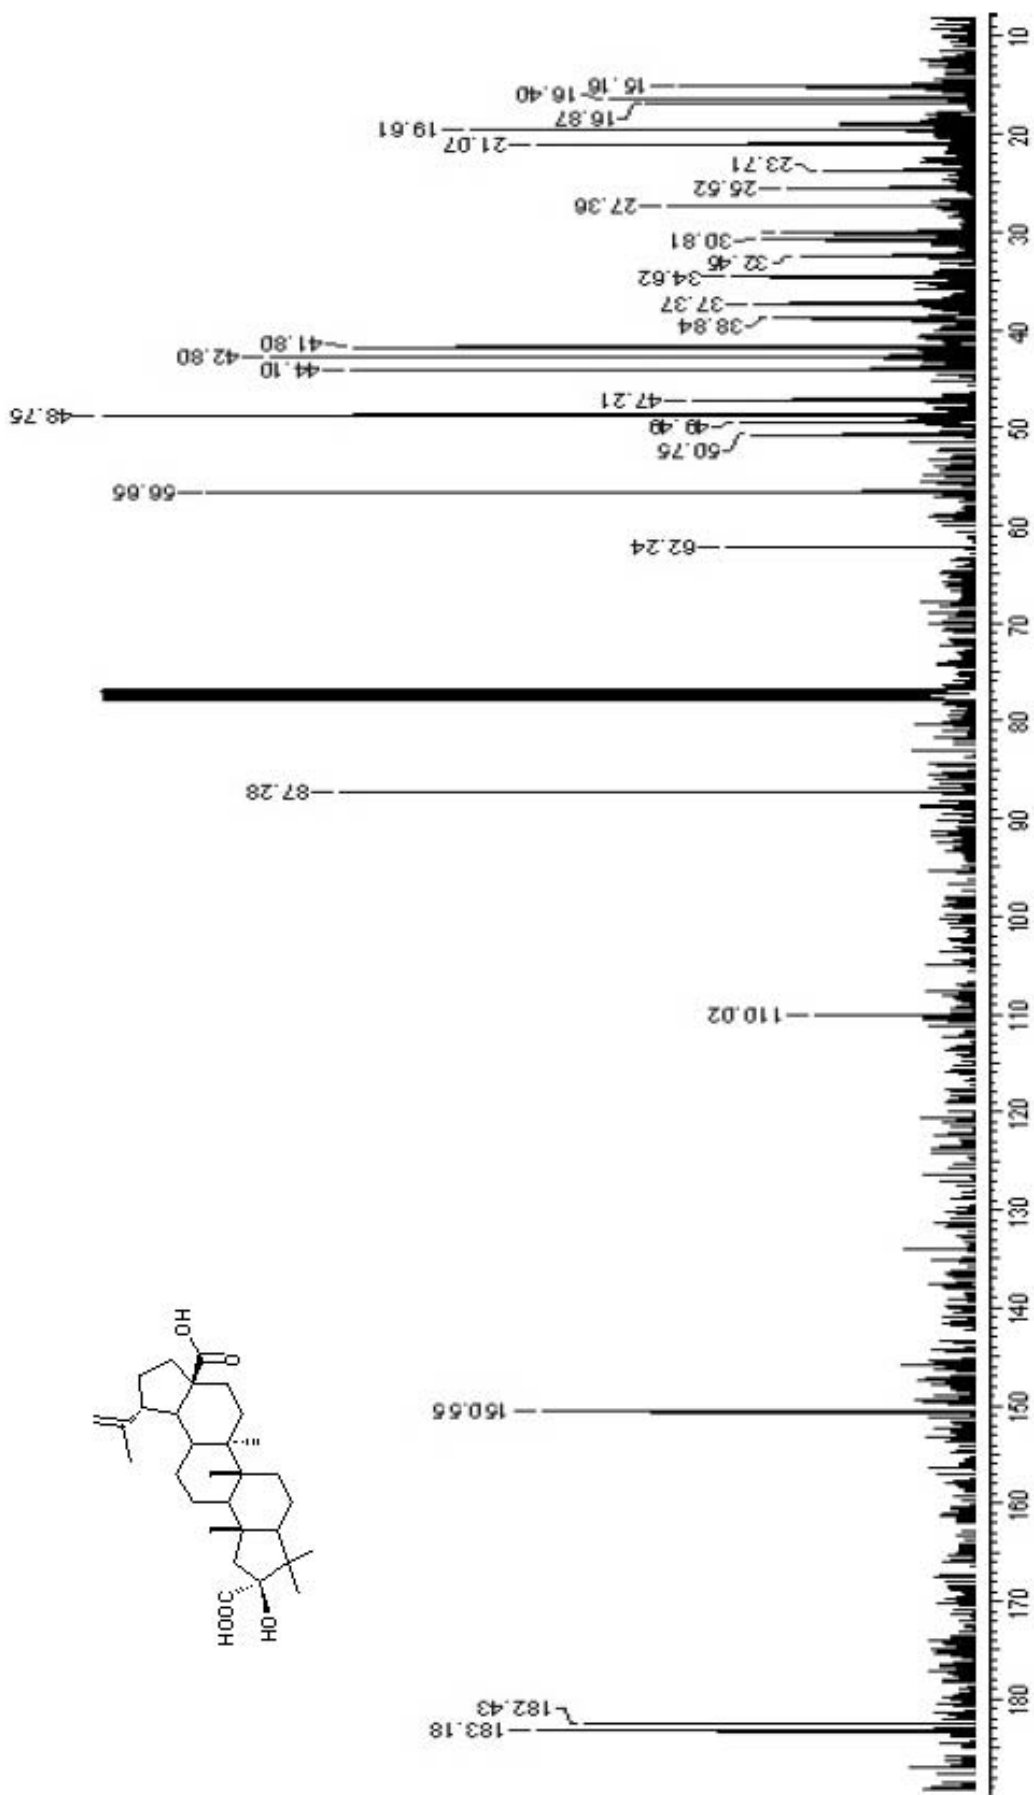

3β-Hydroxy-1(2→3)-abeolup-20-ene-2,28-dioic acid (13), CDCl<sub>3</sub>/tms

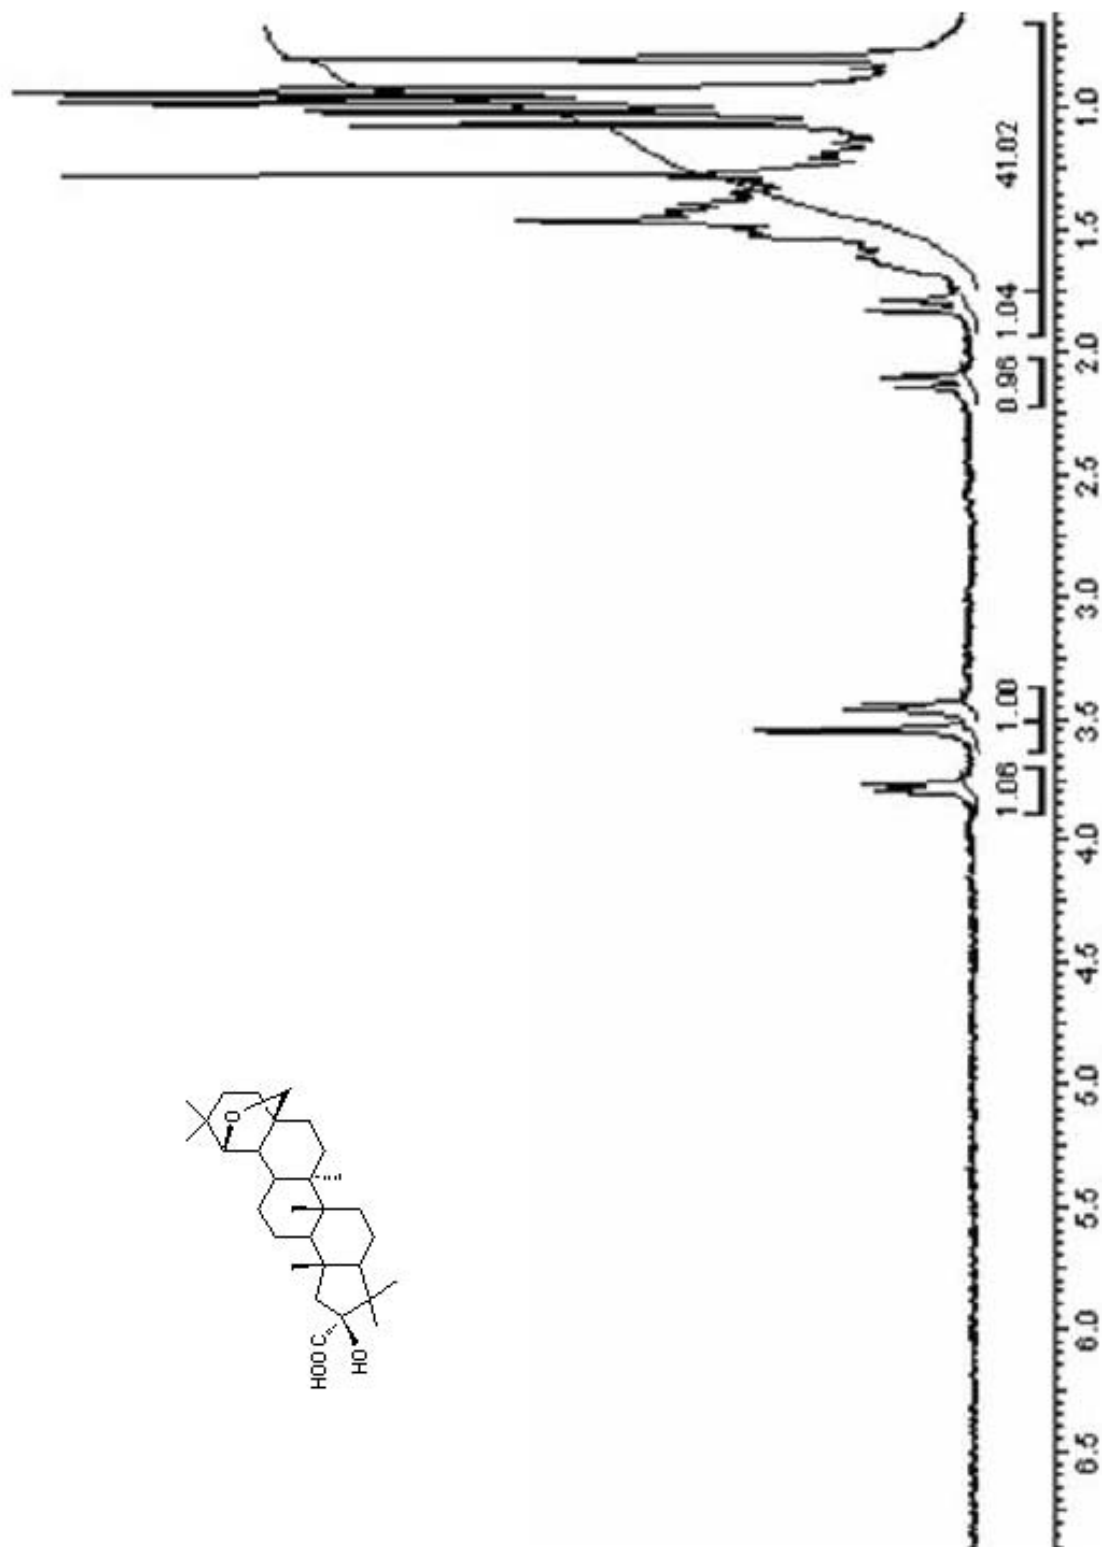

19β,28-Epoxy-3β-hydroxy-1(2→3)-abeo-18α-oleanan-2-oic acid (**14**), CDCl<sub>3</sub>/tms

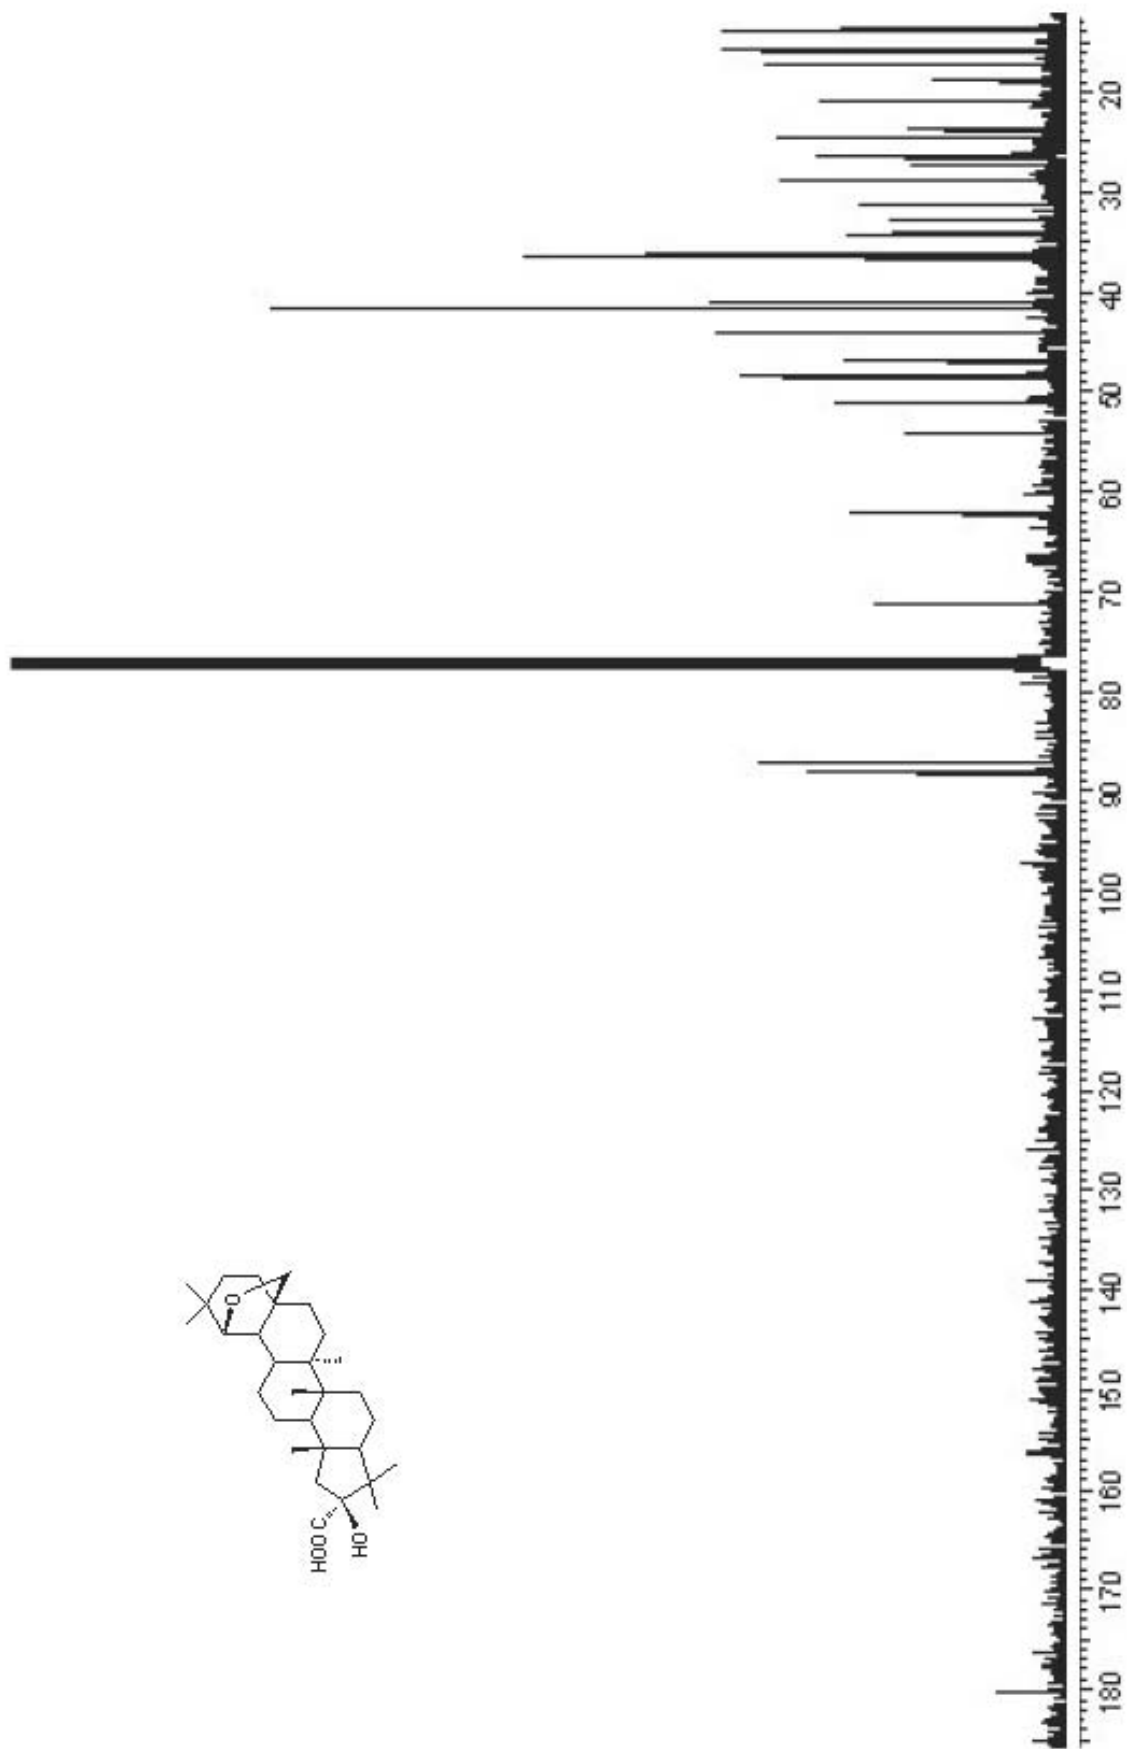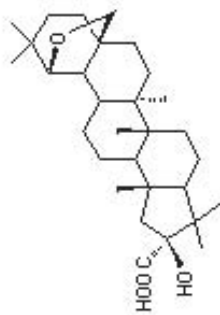

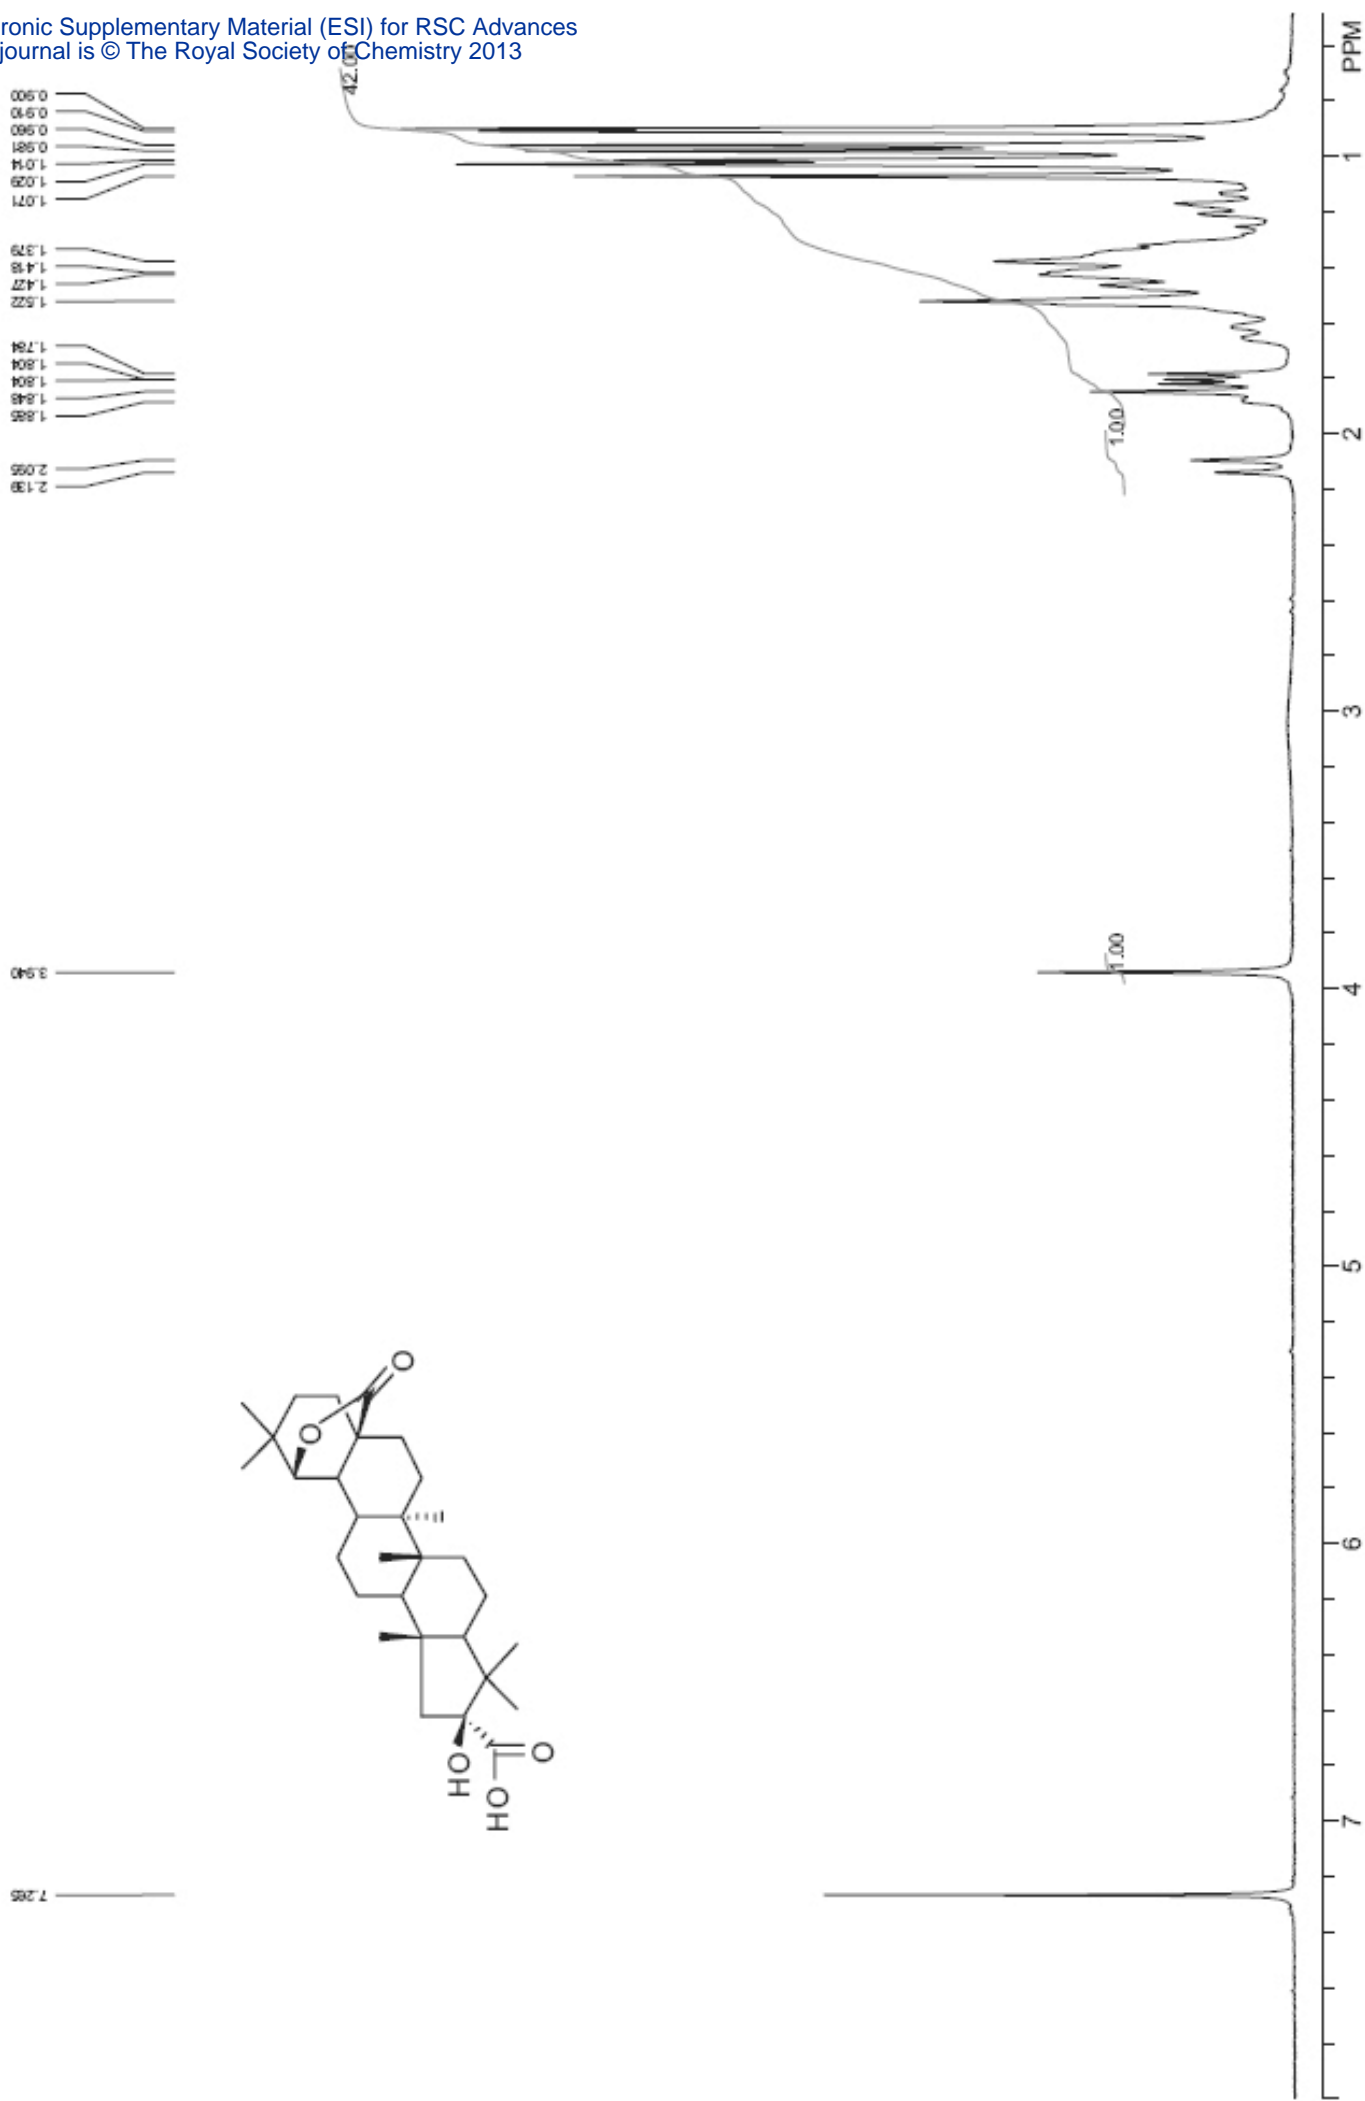

19β,28-Epoxy-3β-hydroxy-28-oxo-1(2→3)-abeo-18α-oleanan-2-oic acid (**15**), CDCl<sub>3</sub>/tms

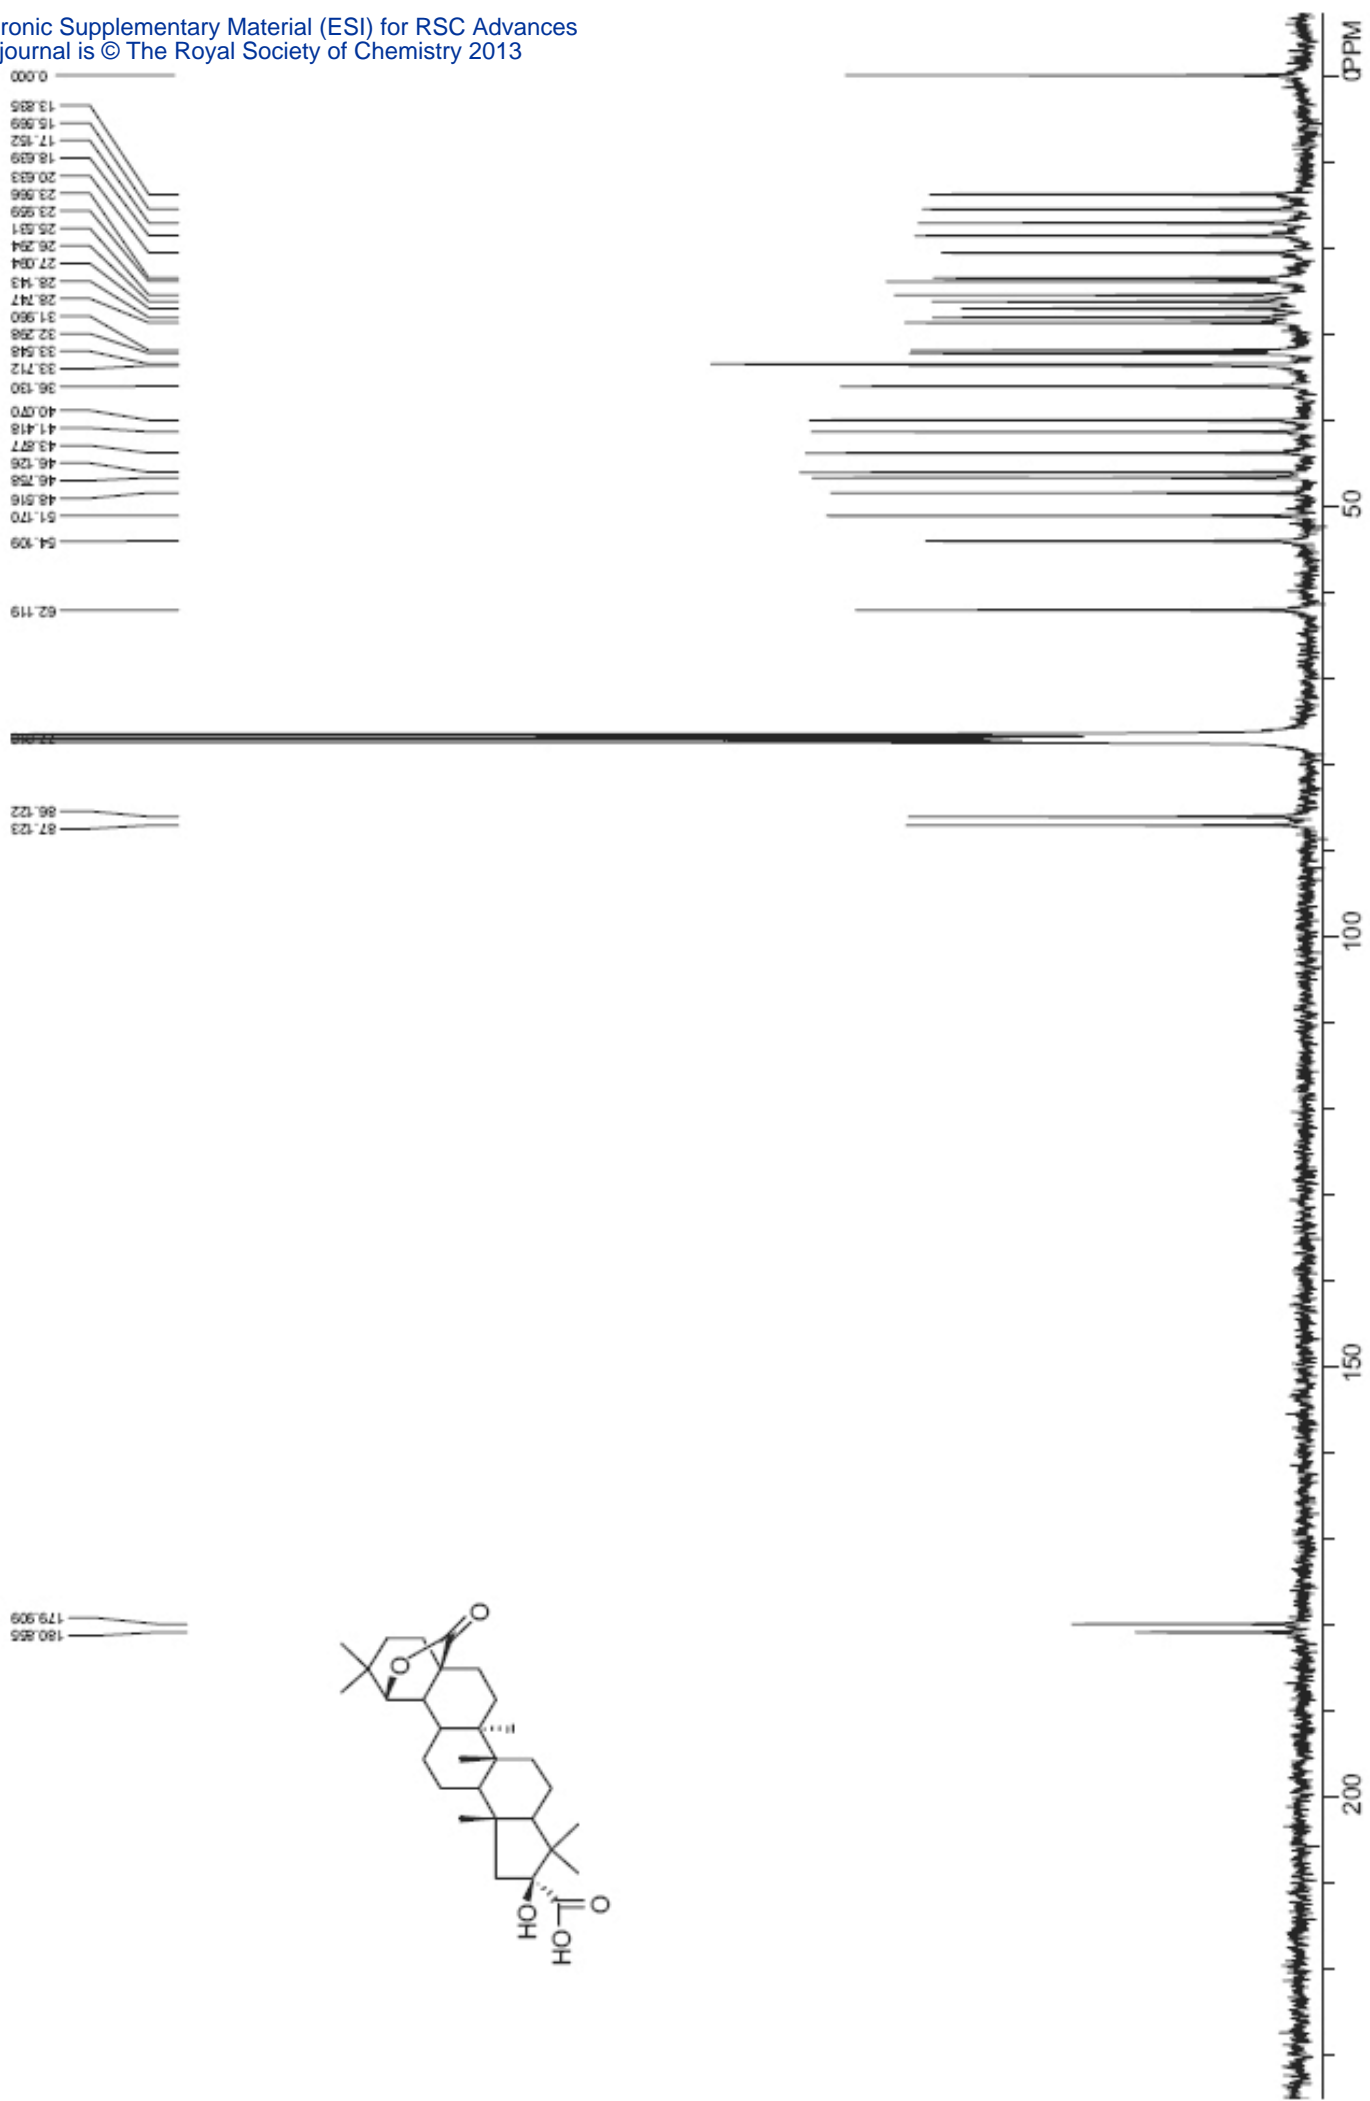

19 $\beta$ ,28-Epoxy-3 $\beta$ -hydroxy-28-oxo-1(2 $\rightarrow$ 3)-abeo-18 $\alpha$ -oleanan-2-oic acid (**15**), CDCl<sub>3</sub>/tms

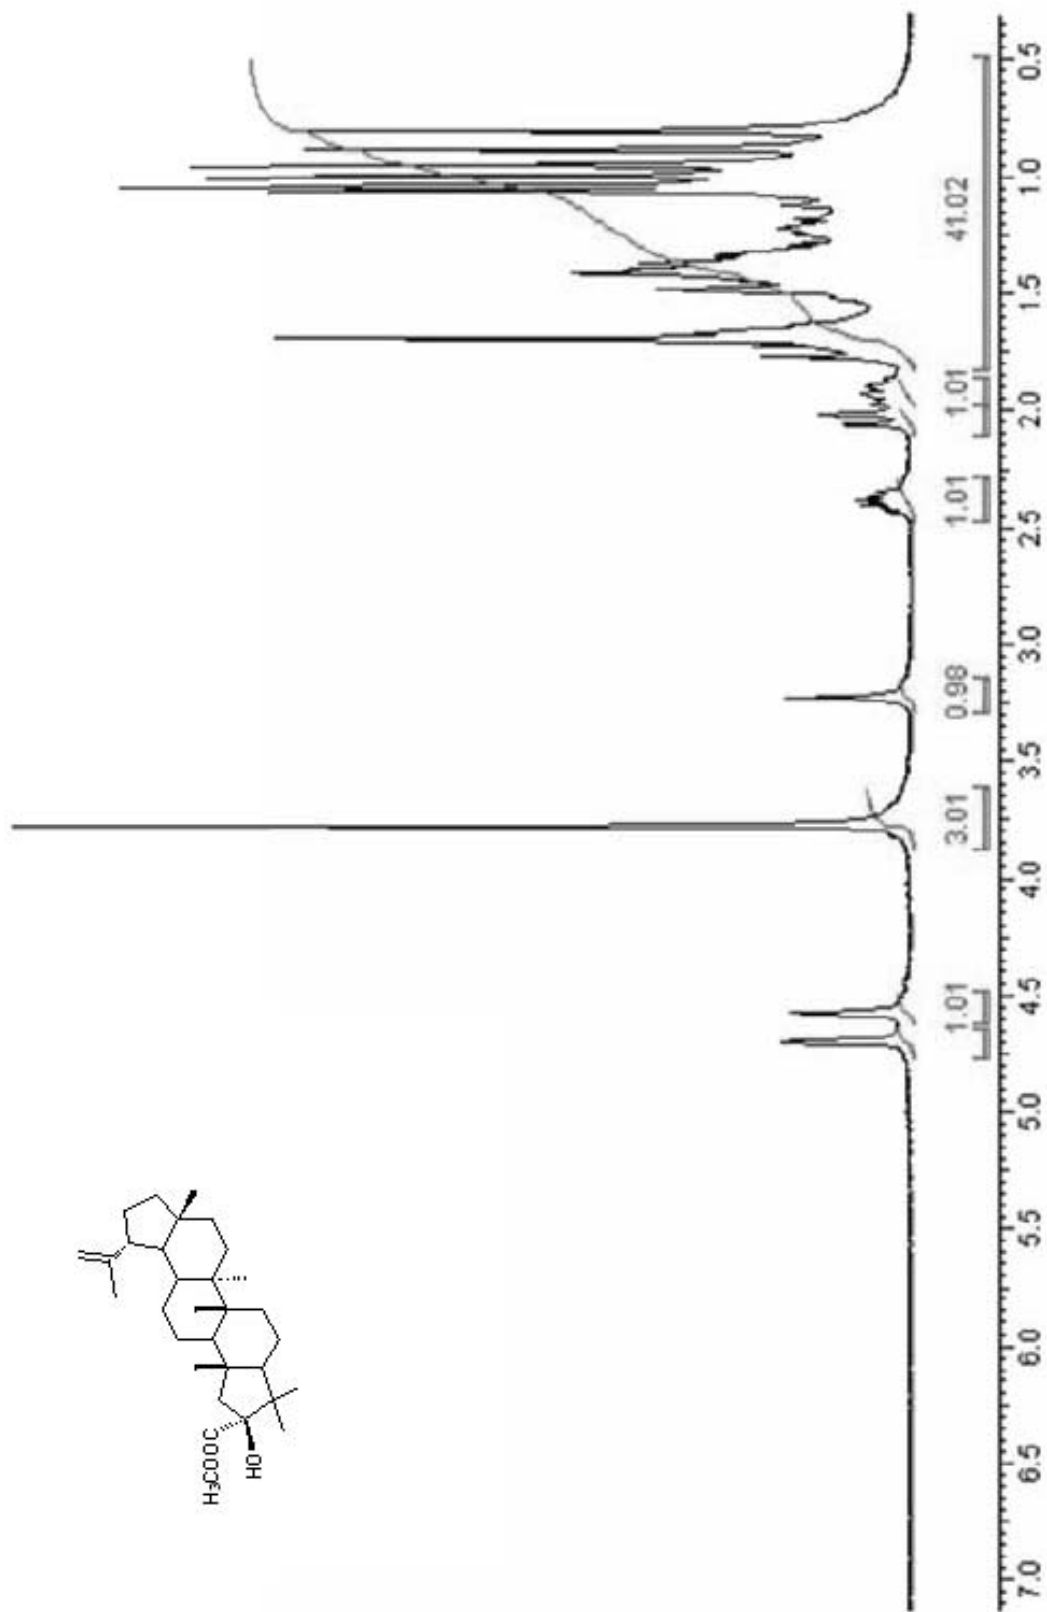

Methyl 3β-hydroxy-1(2→3)-abeolup-20-en-2-oate (16), CDCl<sub>3</sub>/tms

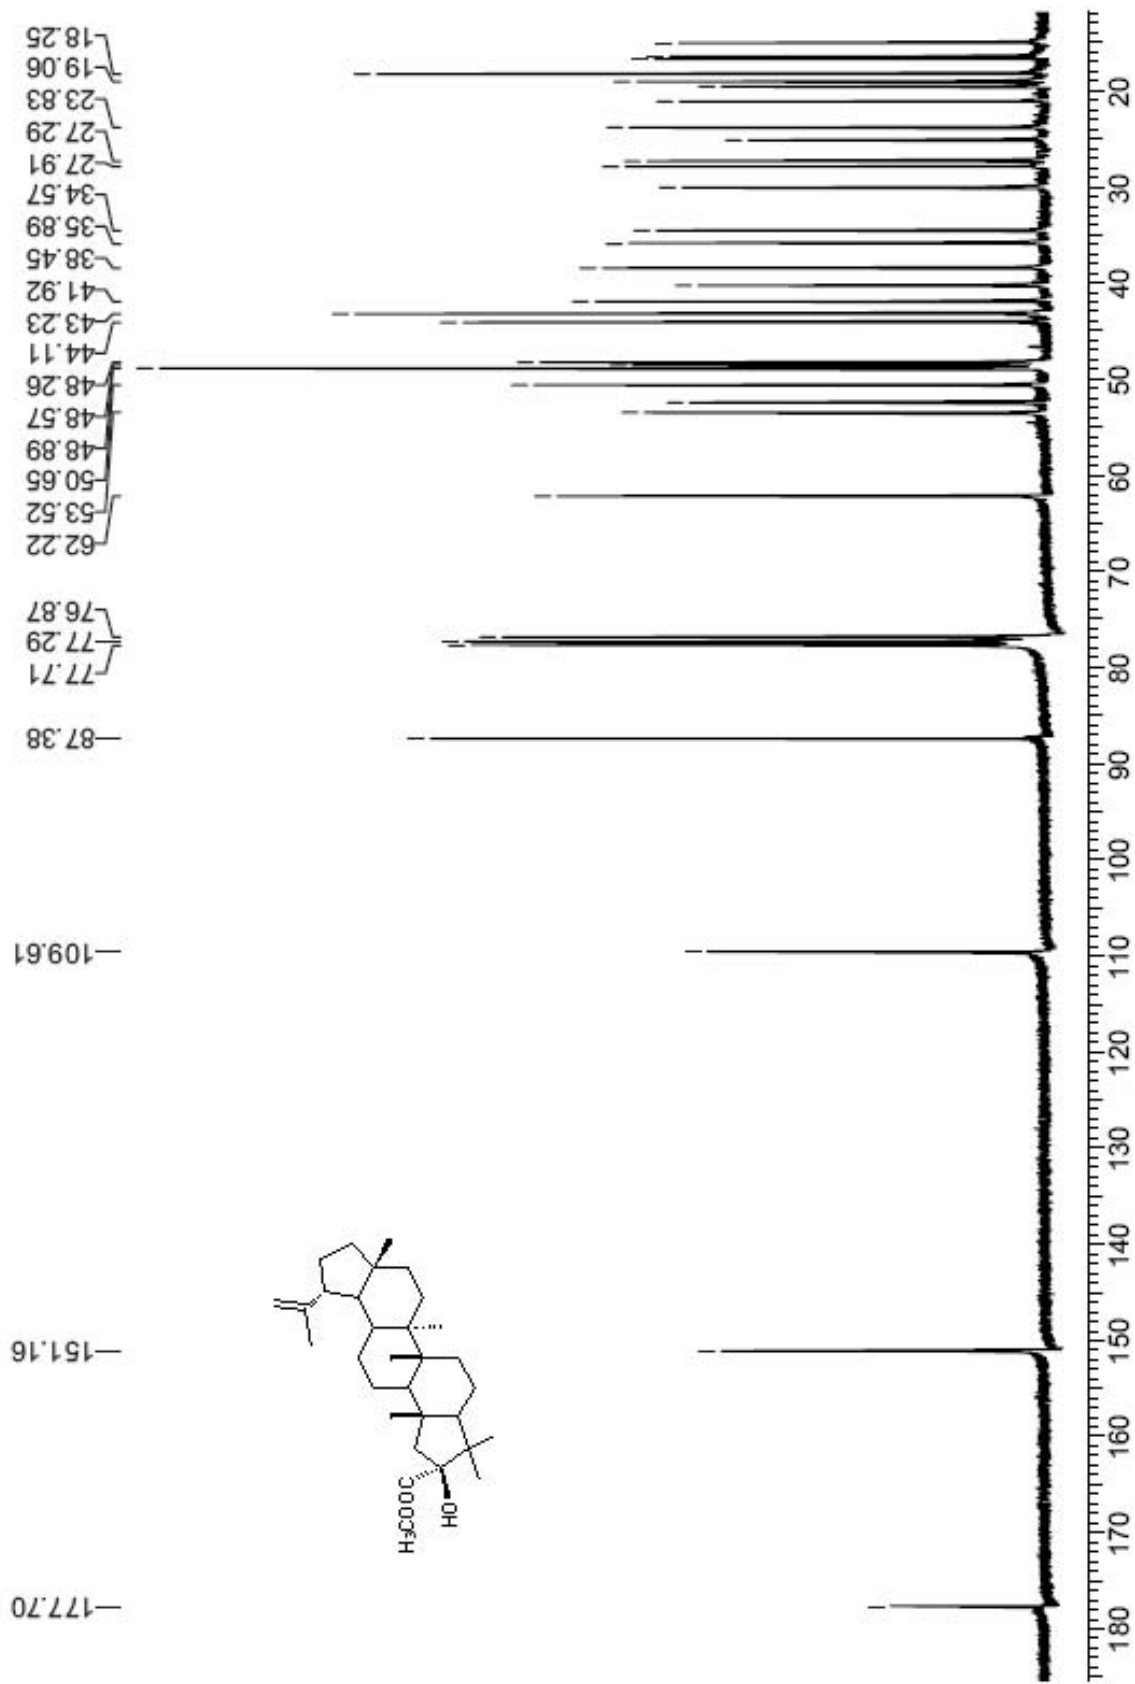

Methyl 3β-hydroxy-1(2→3)-abeolup-20-en-2-oate (16), CDCl<sub>3</sub>/tms



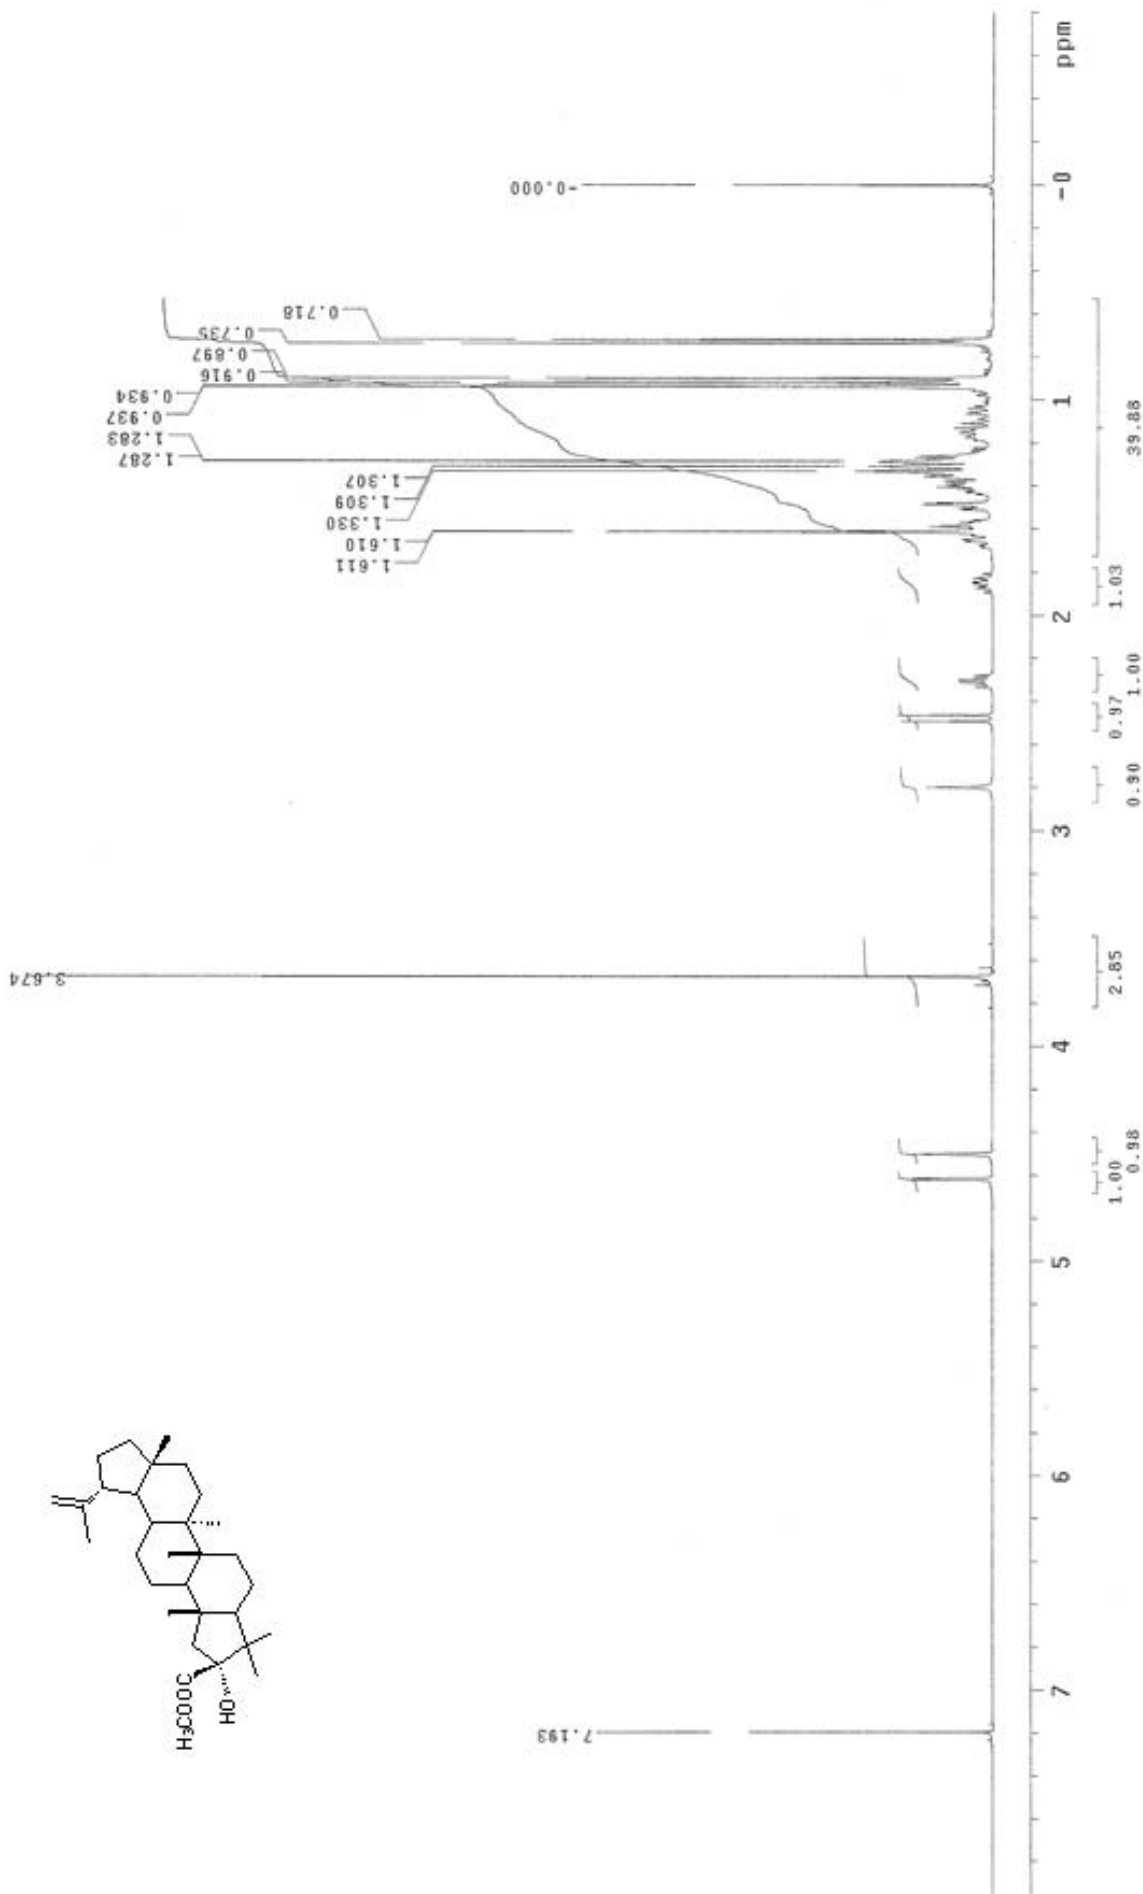

Methyl 3α-hydroxy-1(2→3)-abeolup-20-en-2-oate (**16'**), CDCl<sub>3</sub>/tms

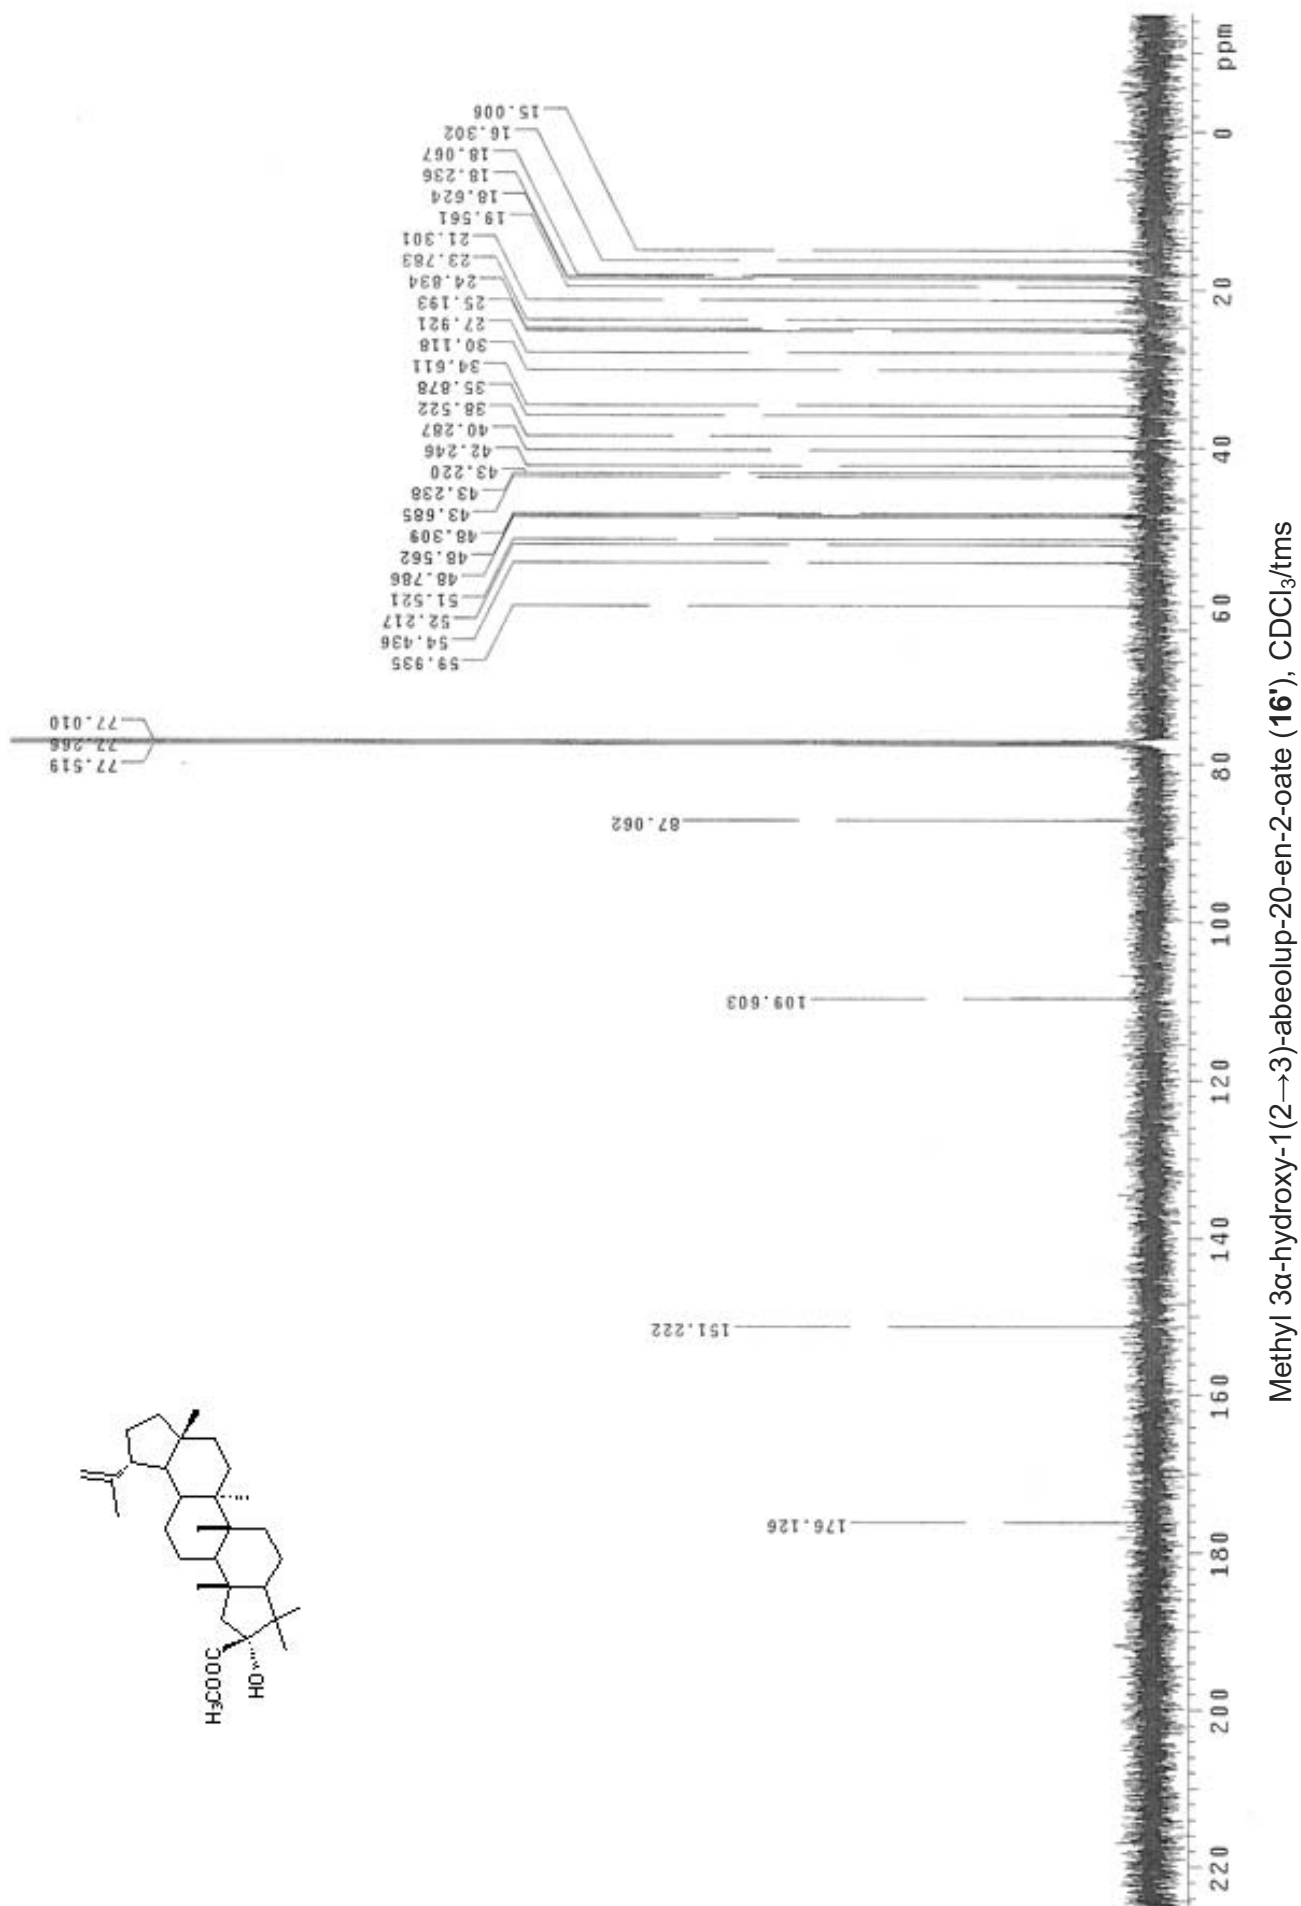

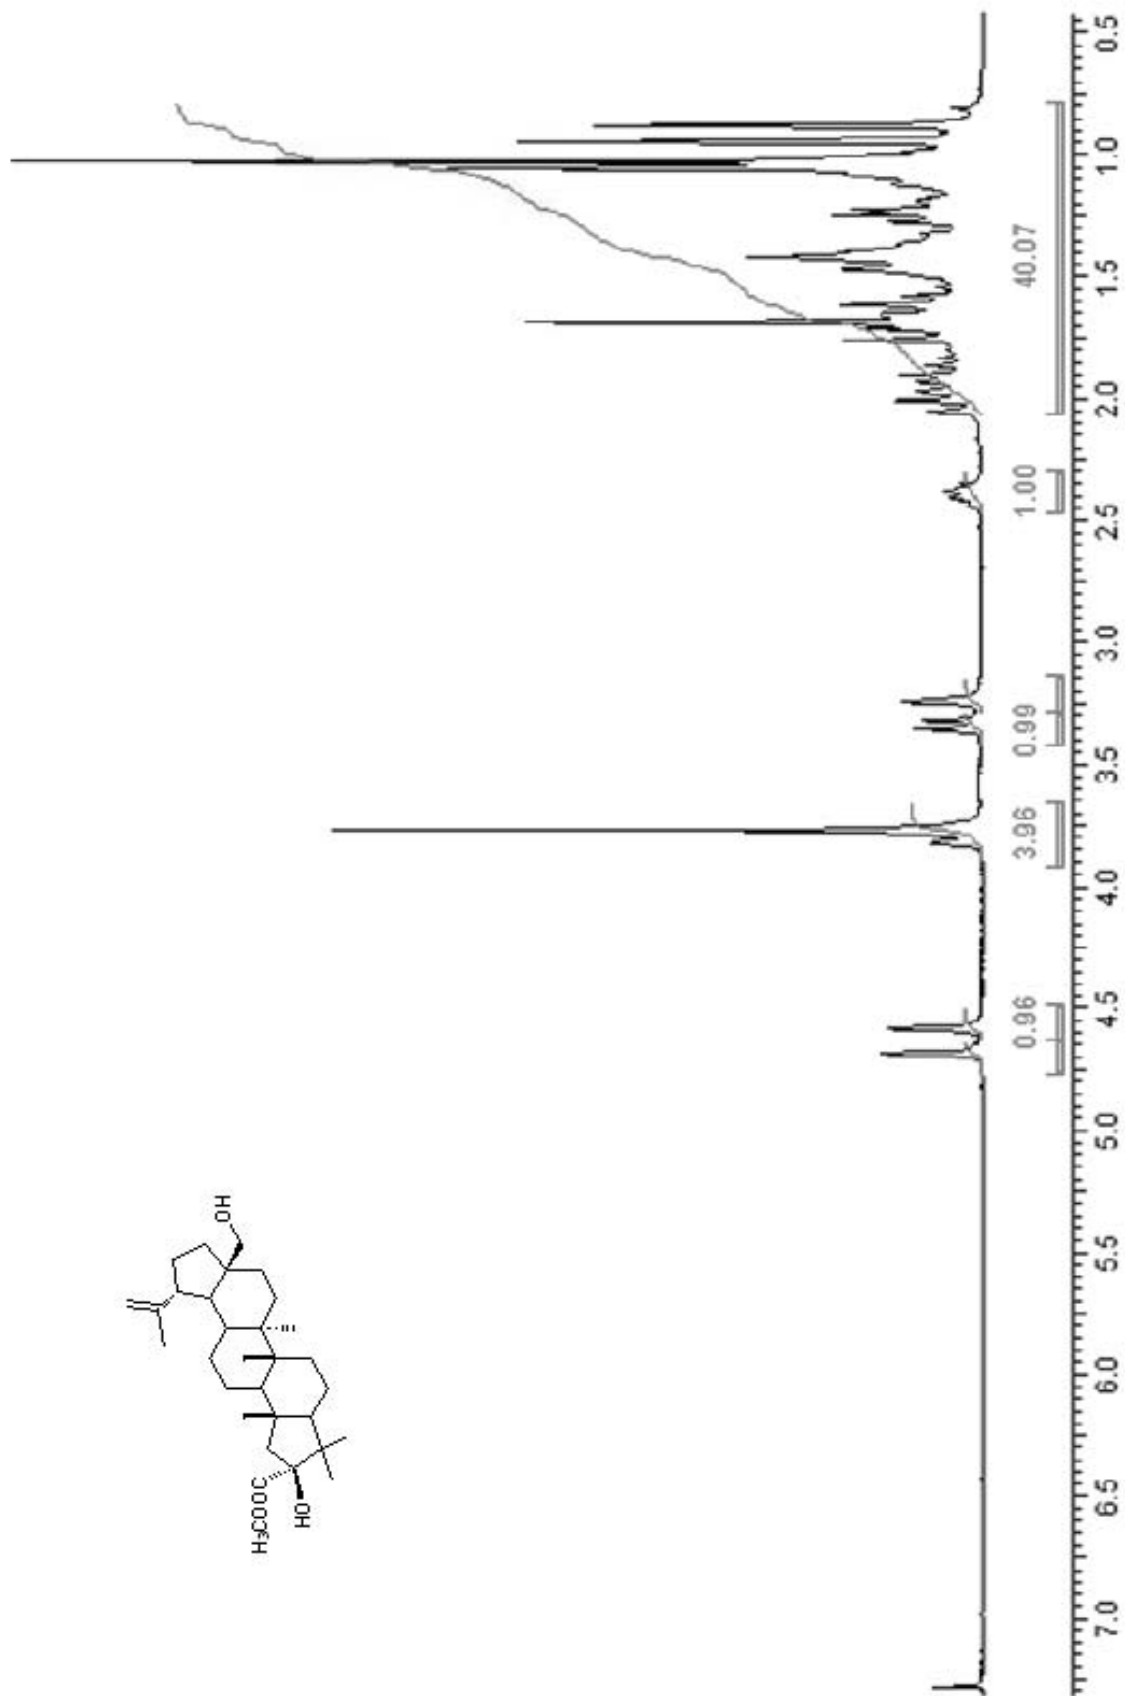

Methyl 3β,28-dihydroxy-1(2→3)-abeolup-20-en-2-oate (**17**), CDCl<sub>3</sub>/tms

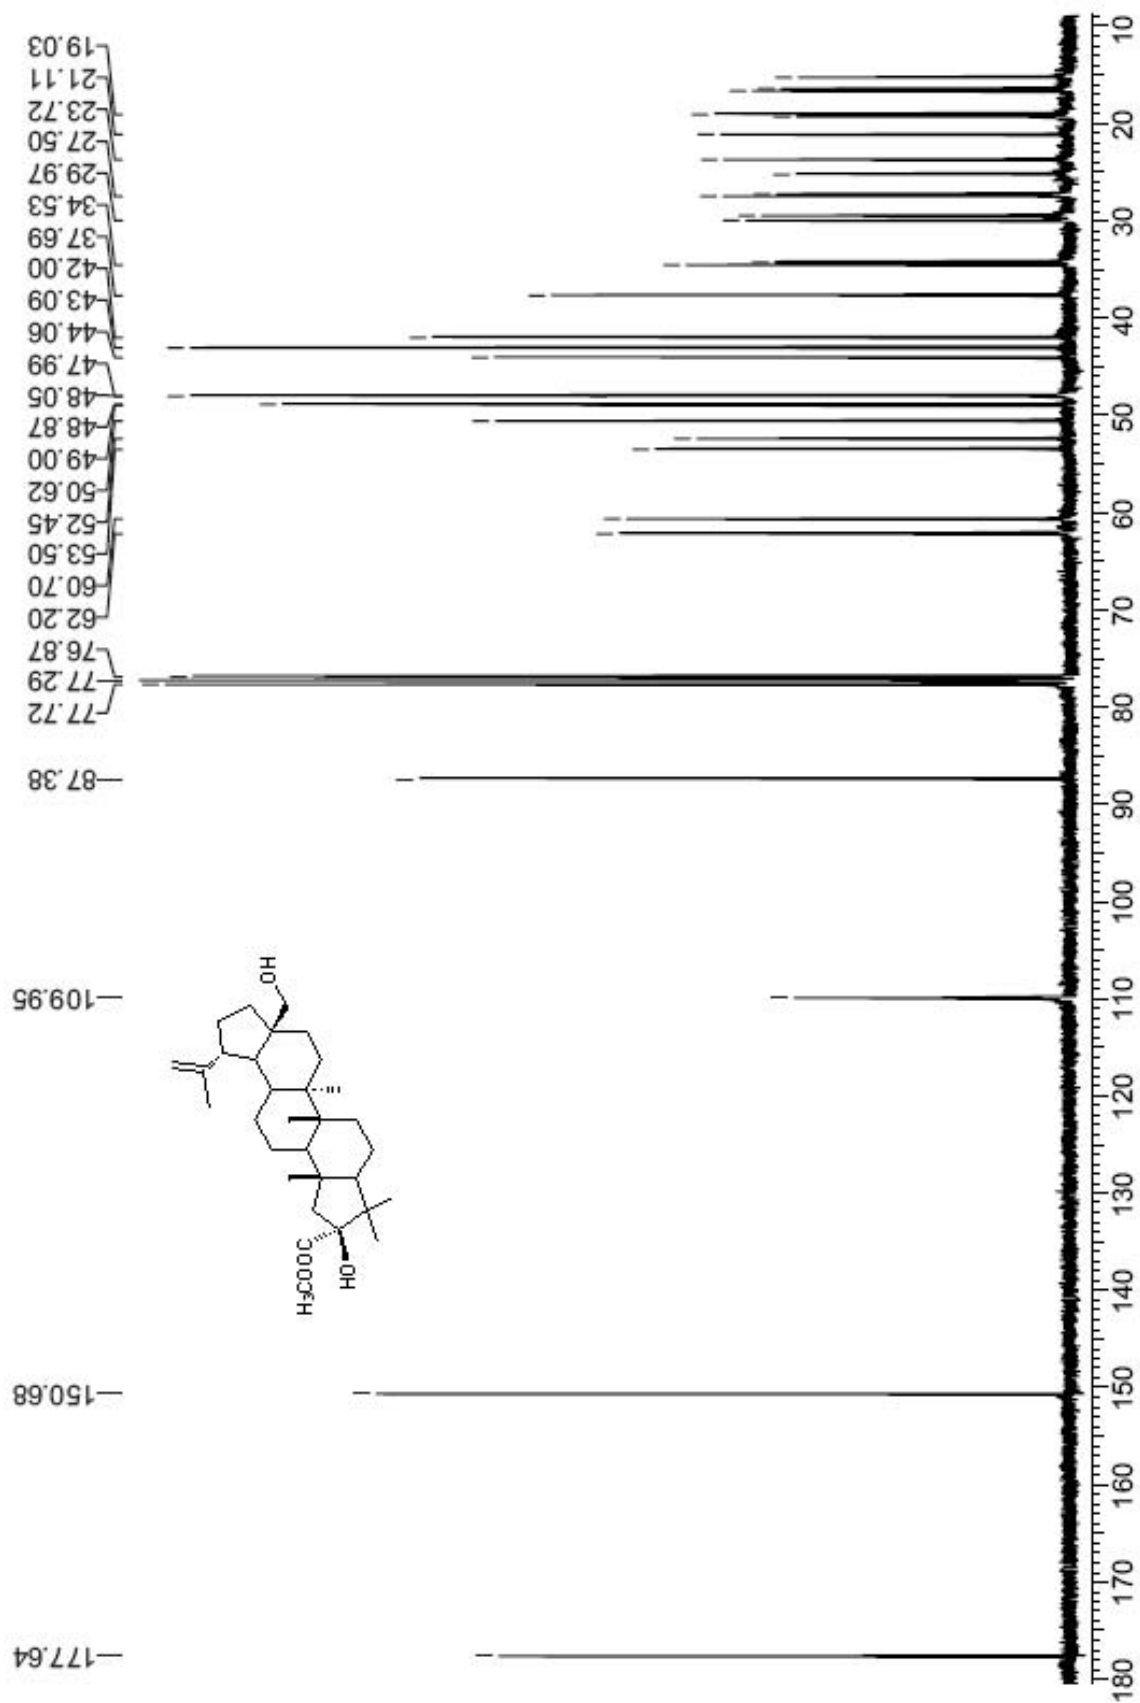

Methyl 3β,28-dihydroxy-1(2→3)-abeolup-20-en-2-oate (17), CDCl<sub>3</sub>/TMS

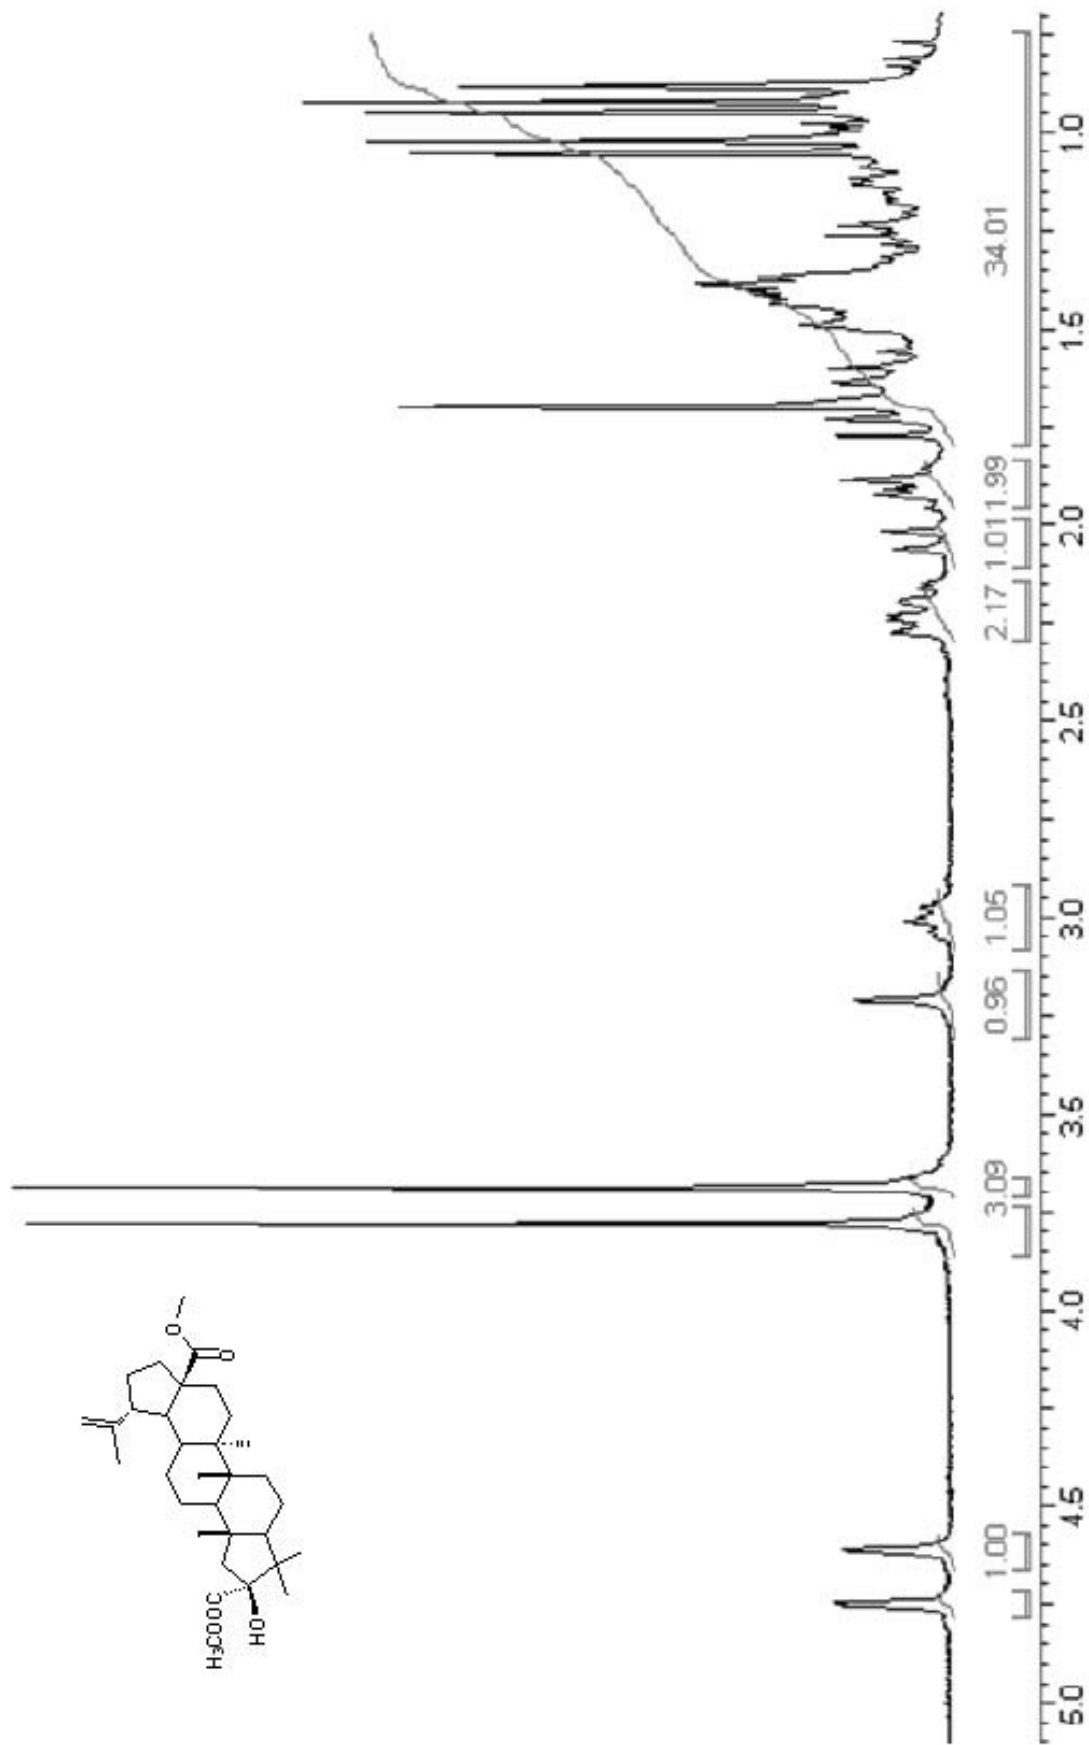

Dimethyl 3β-hydroxy-1(2→3)-abeolup-20-ene-2,28-dioate (**18**), CDCl<sub>3</sub>/tms

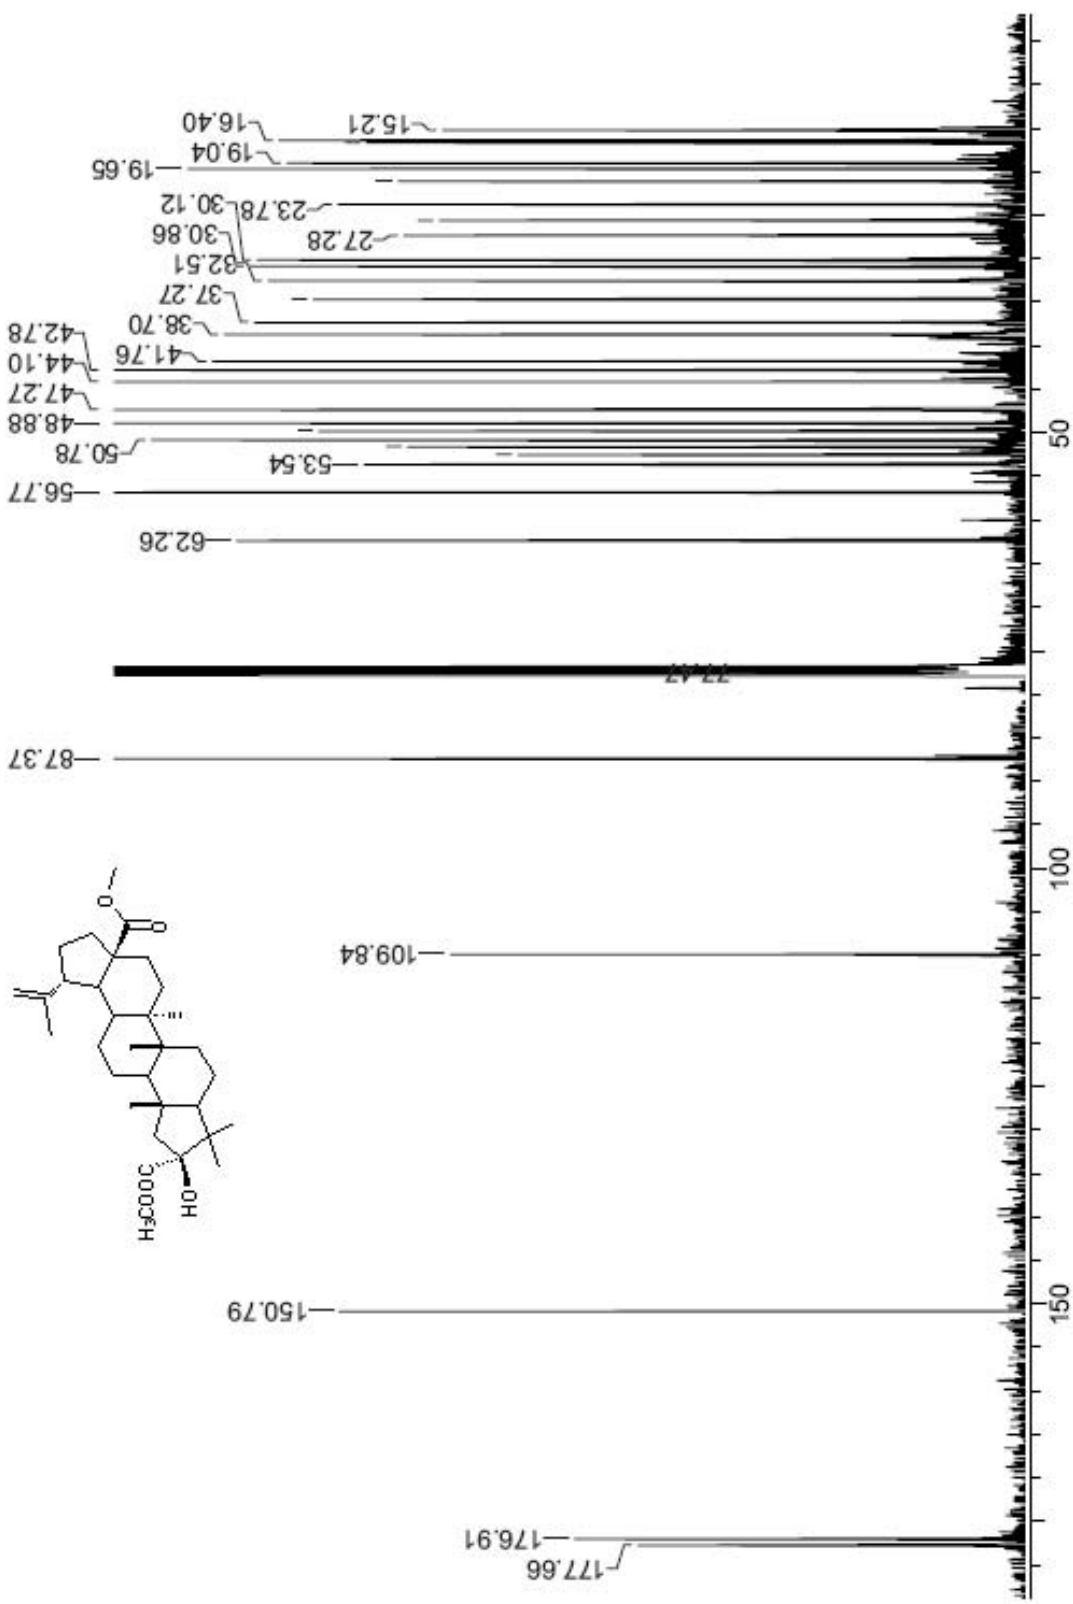

Dimethyl 3β-hydroxy-1(2→3)-abeolup-20-ene-2,28-dioate (18), CDCl<sub>3</sub>/tms

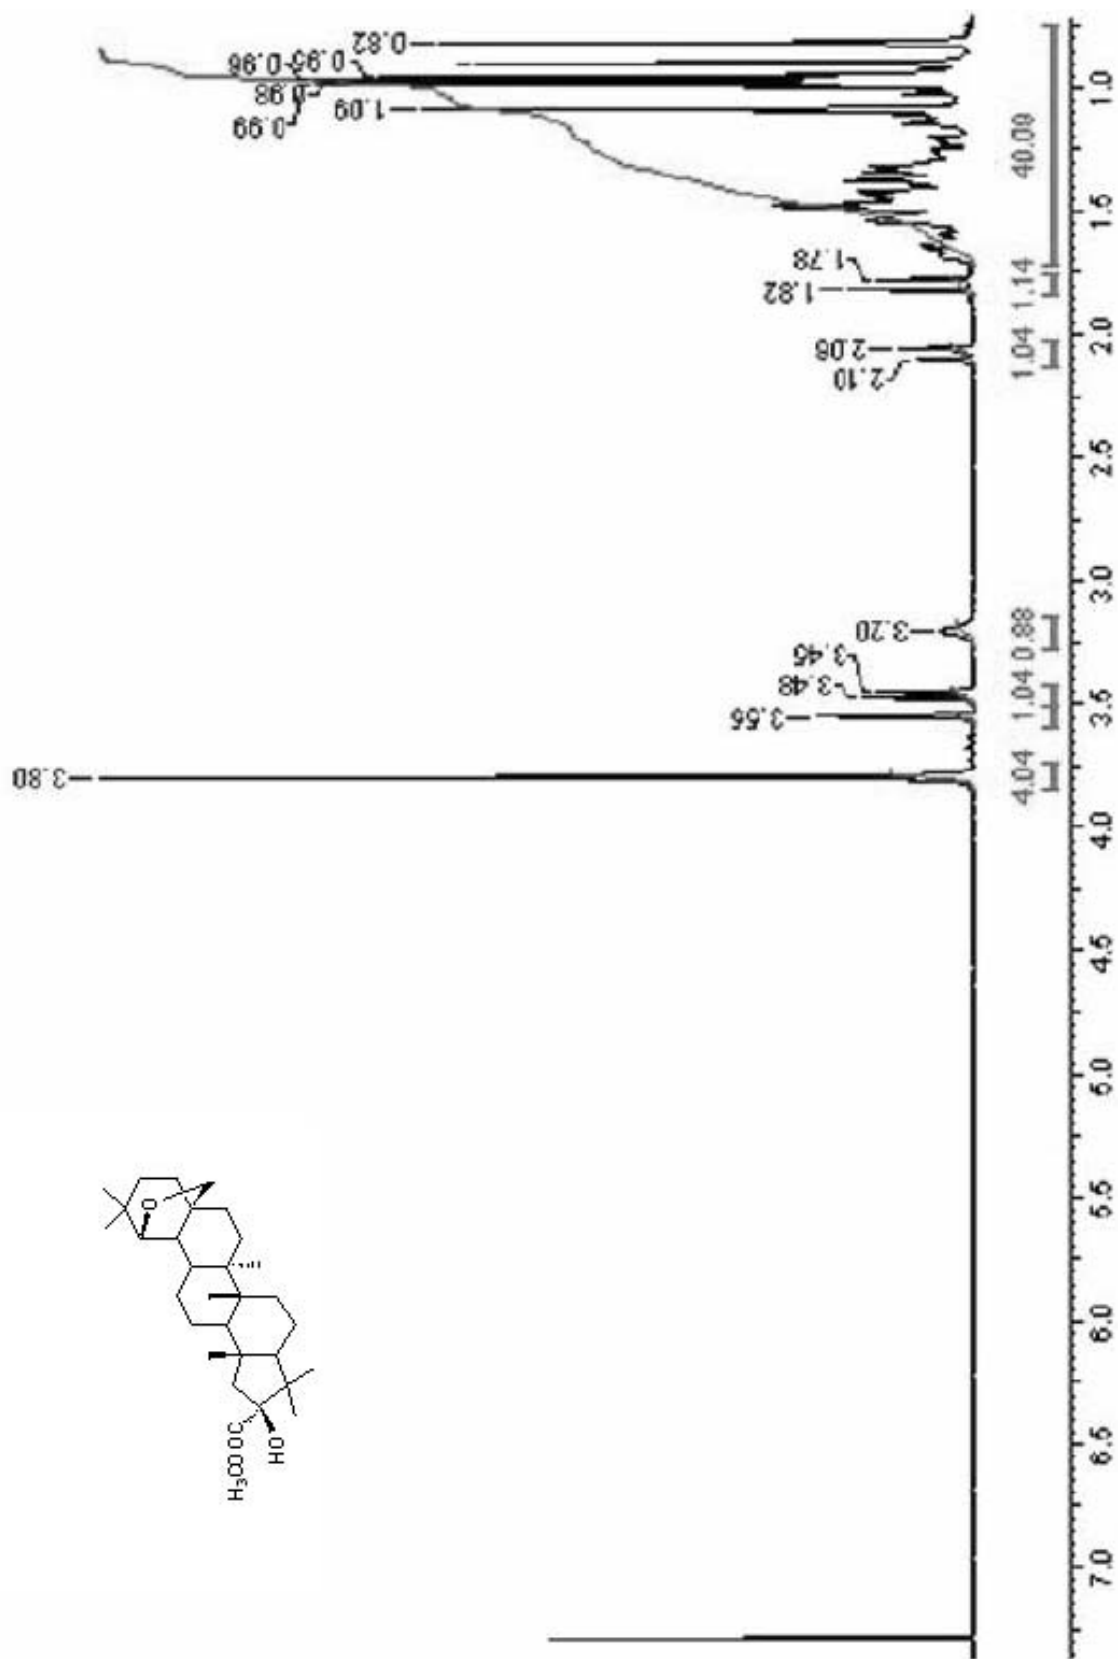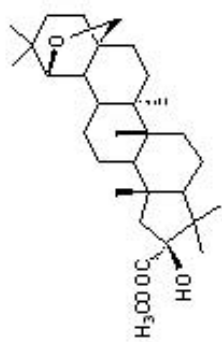

Methyl 19β,28-epoxy-3β-hydroxy-1(2→3)-abeo-18α-oleanan-2-oate (**19**), CDCl<sub>3</sub>/tms

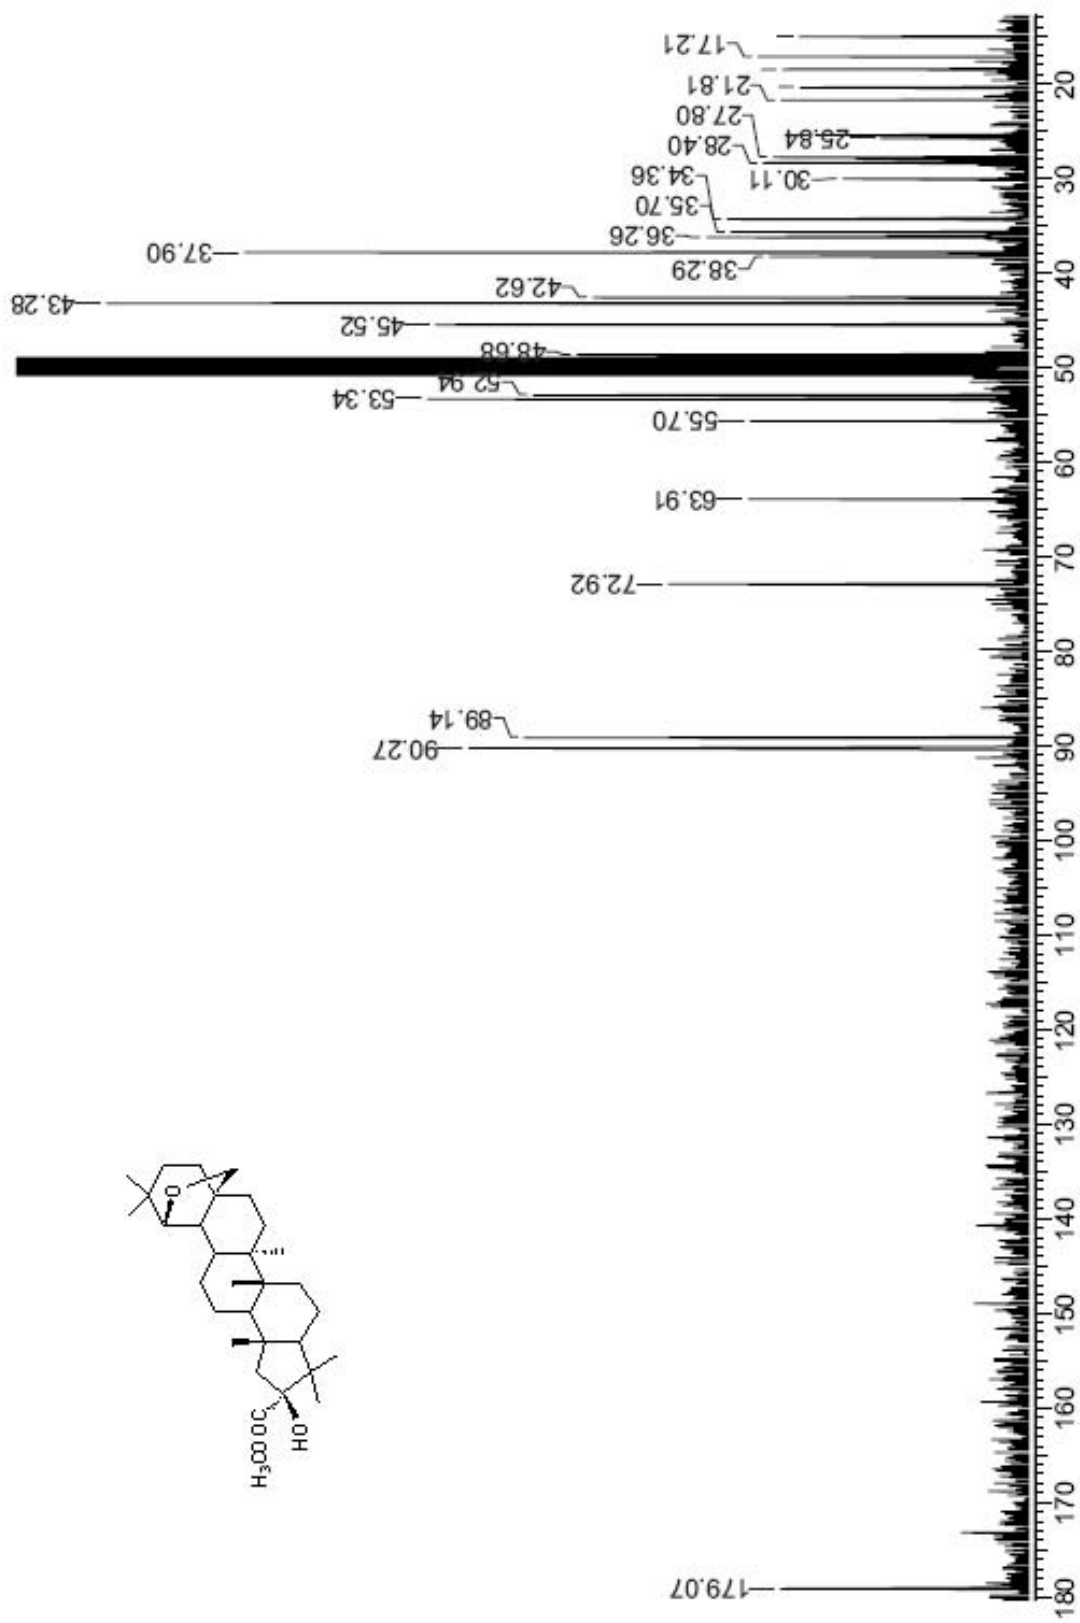

Methyl 19β,28-epoxy-3β-hydroxy-1(2→3)-abeo-18α-oleanan-2-oate (19), CD<sub>3</sub>OD/tms





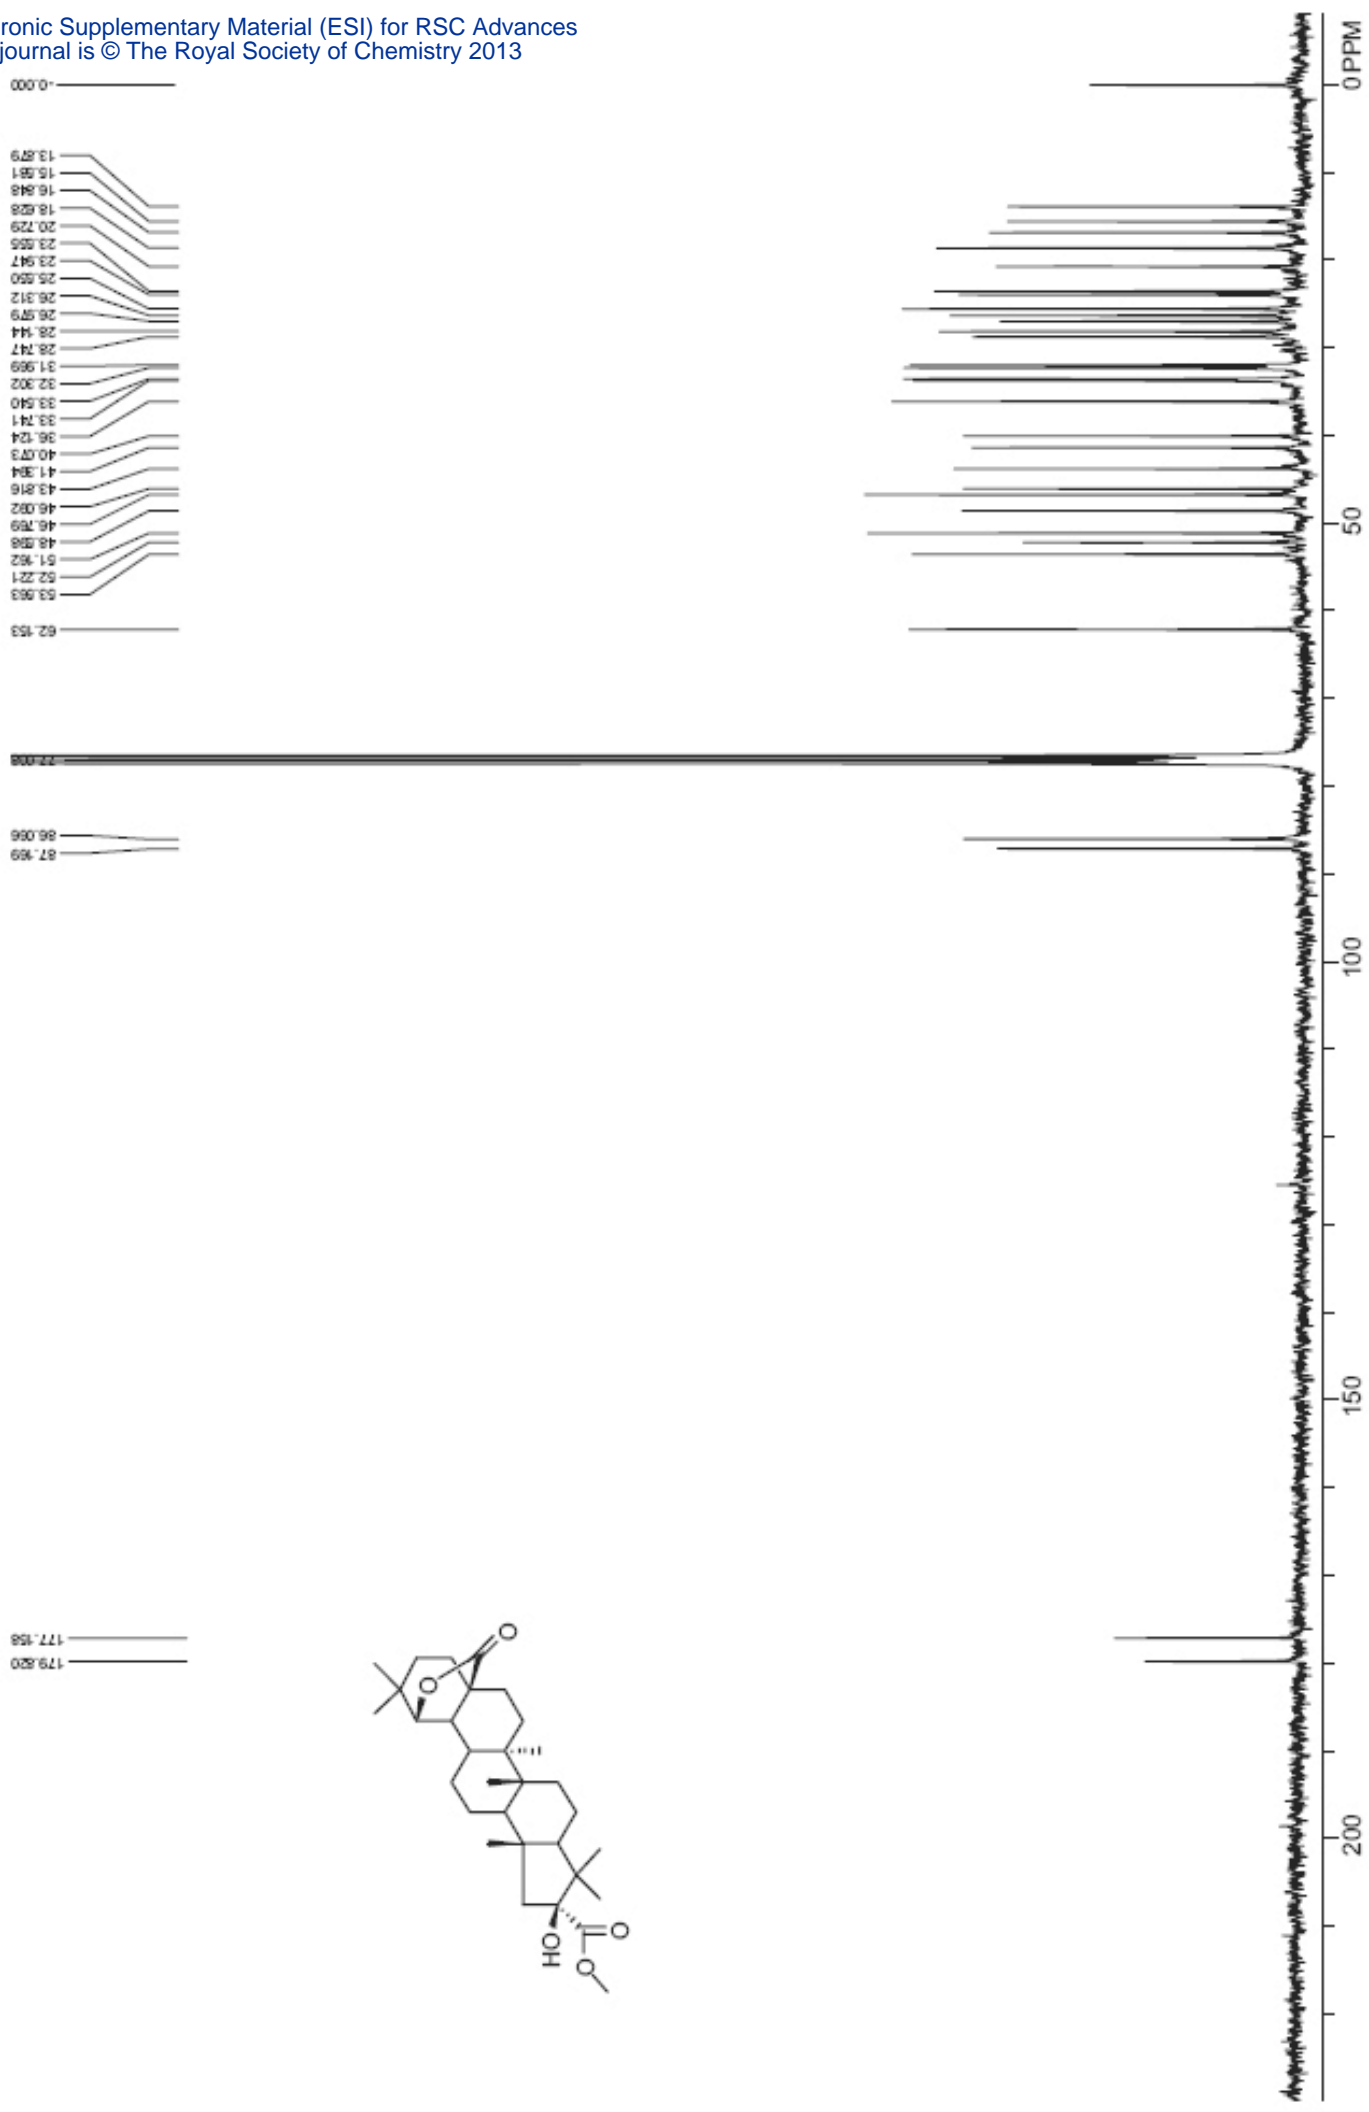

Methyl 19 $\beta$ ,28-epoxy-3 $\beta$ -hydroxy-28-oxo-1(2 $\rightarrow$ 3)-abeo-18 $\alpha$ -oleanan-2-oate (**20**), CDCl<sub>3</sub>/tms

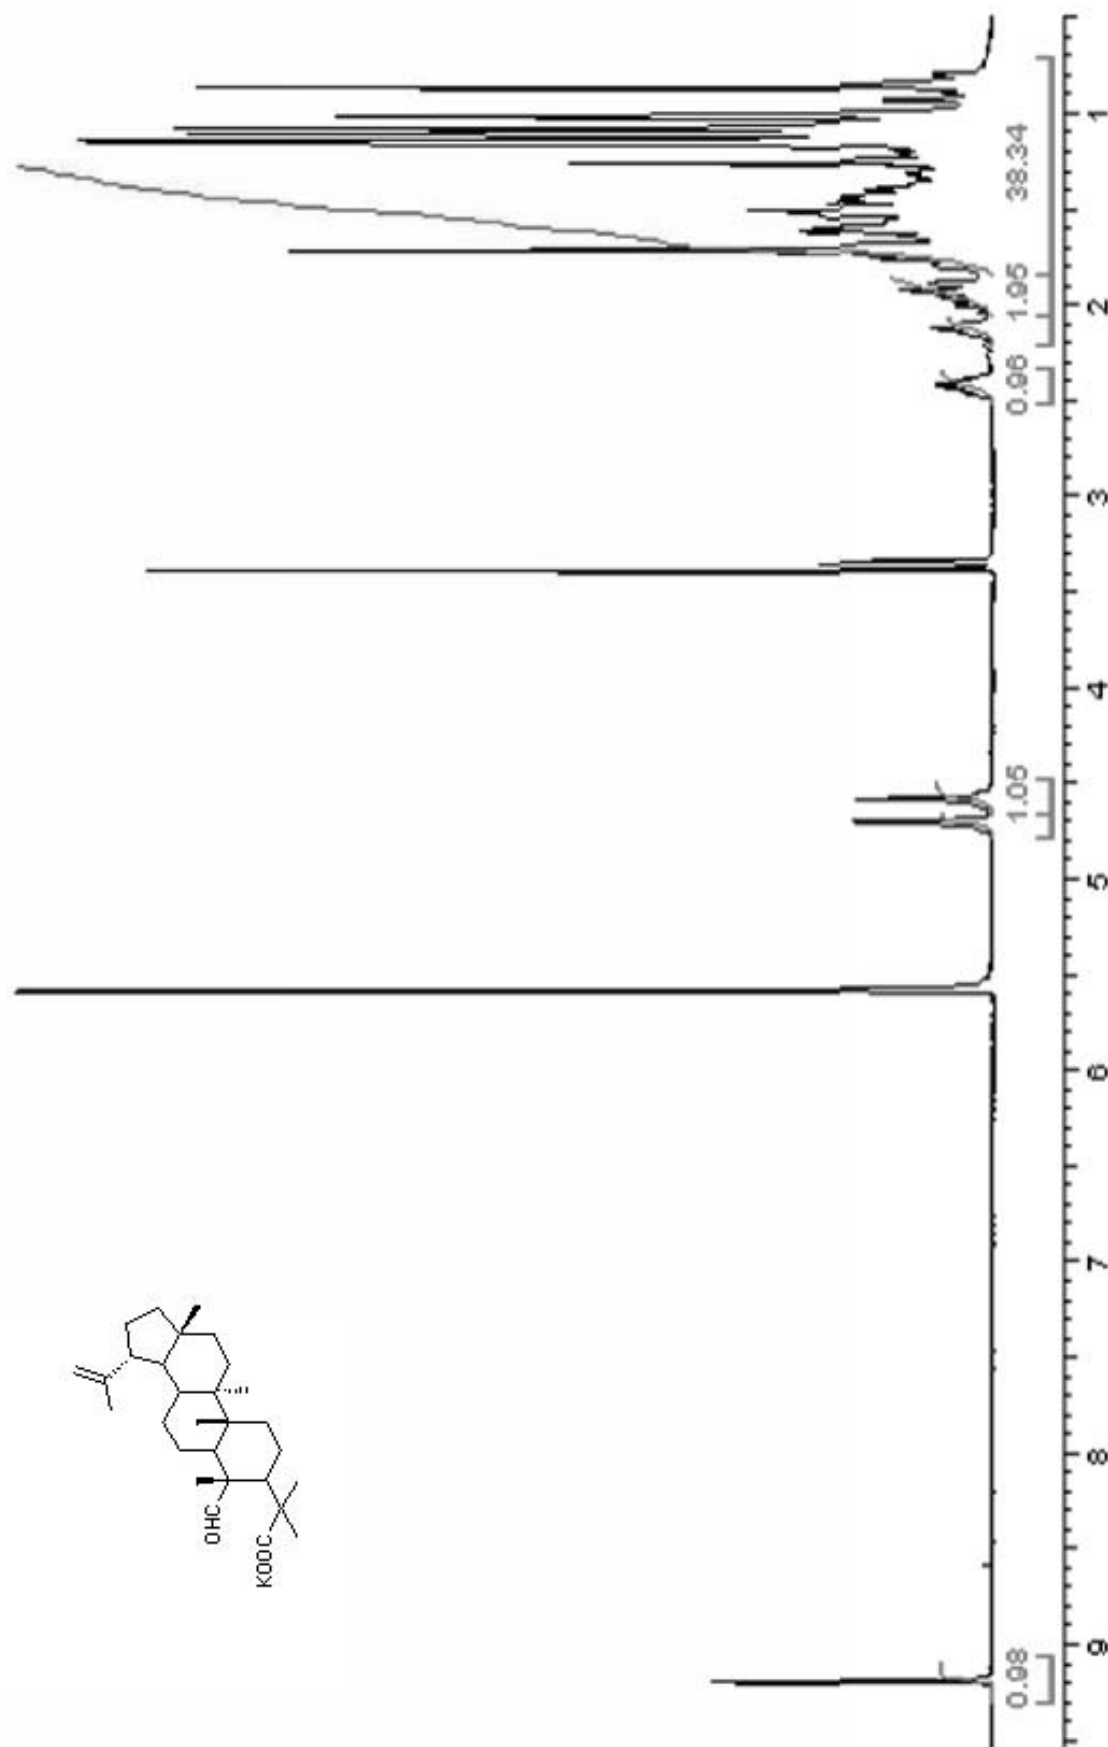

Potassium 1-oxo-1,3-seco-2-norlup-20-en-3-oate (**21**) CD<sub>3</sub>OD + 1wt% KOH/tms

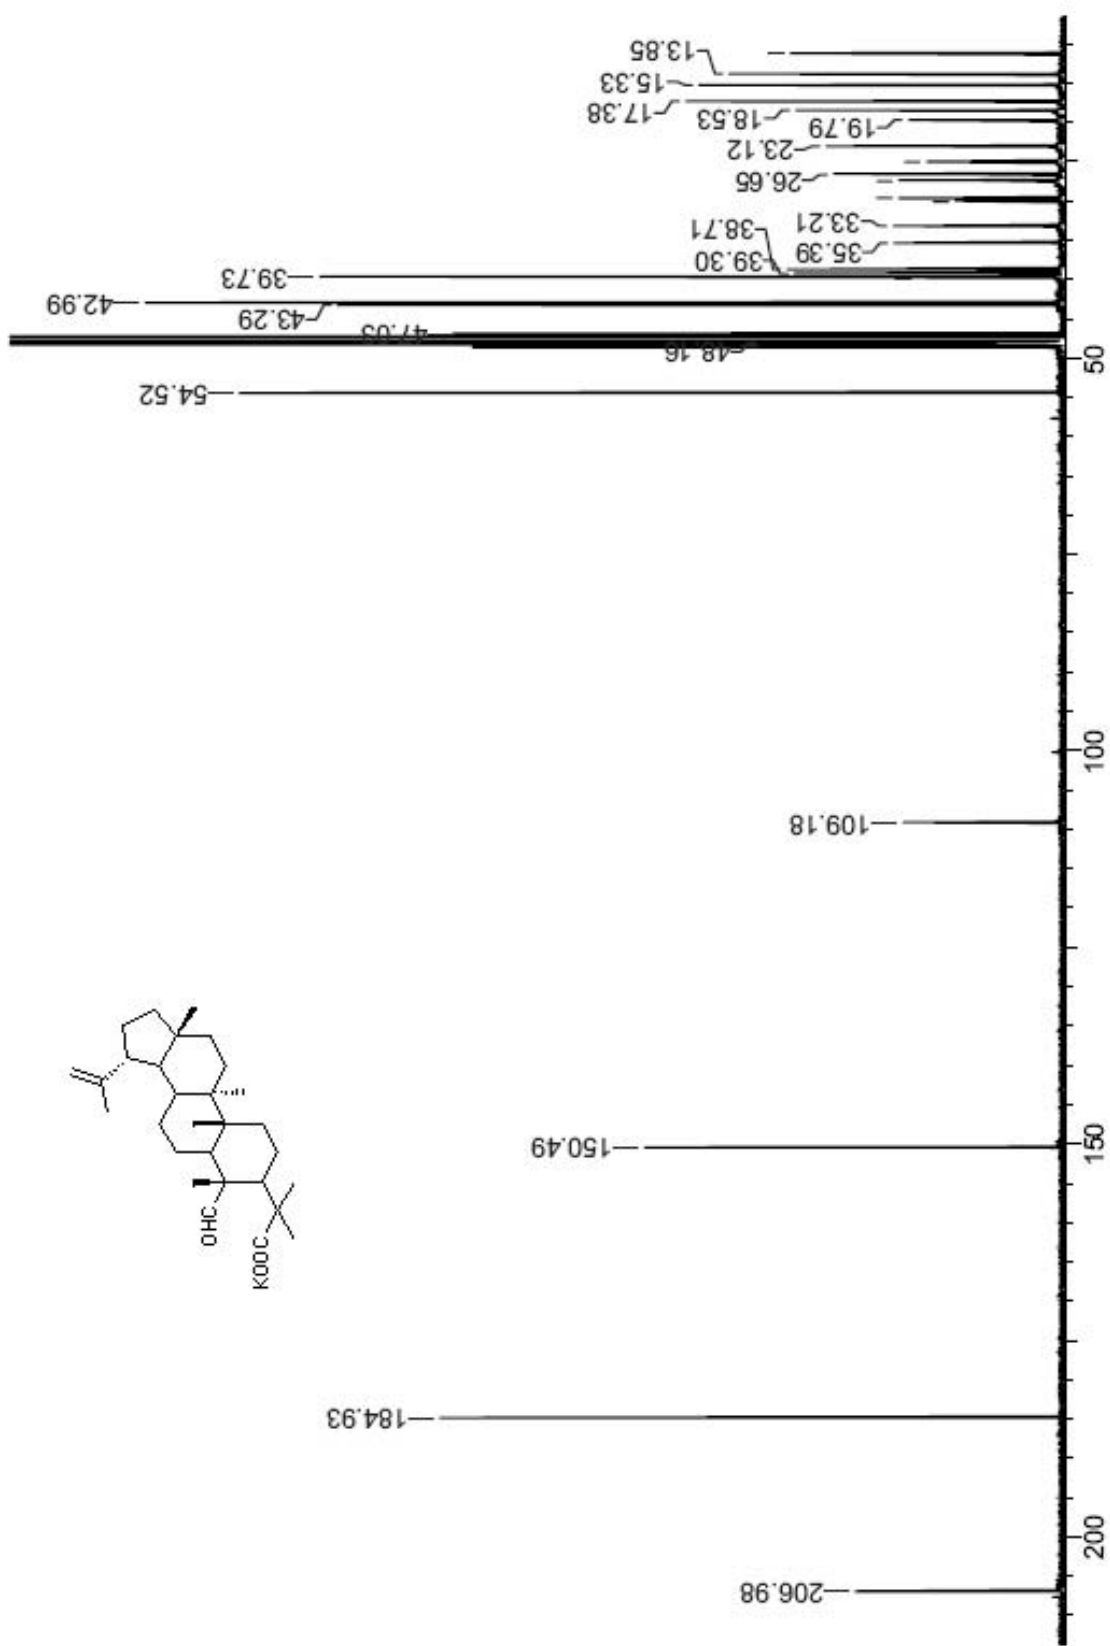

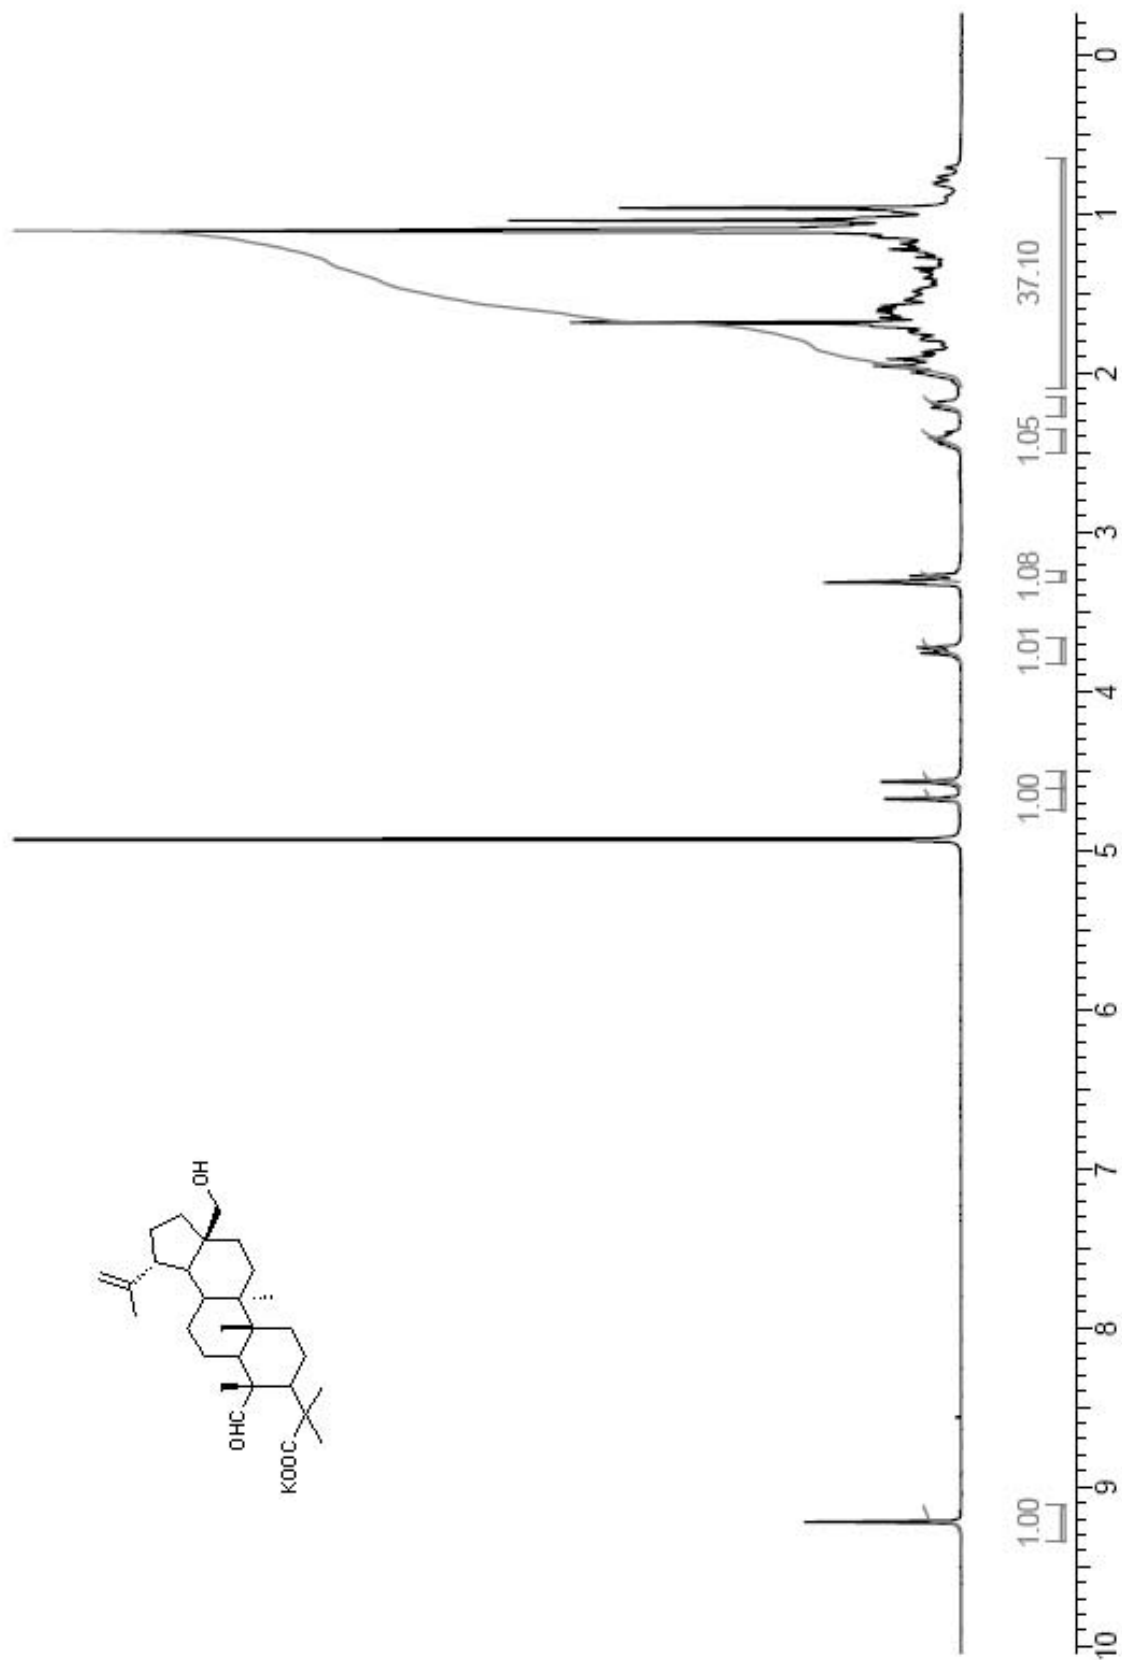

Potassium 28-hydroxy-1-oxo-1,3-seco-2-norlup-20-en-3-oate (**22**) CD<sub>3</sub>OD + 1wt% KOH/tms

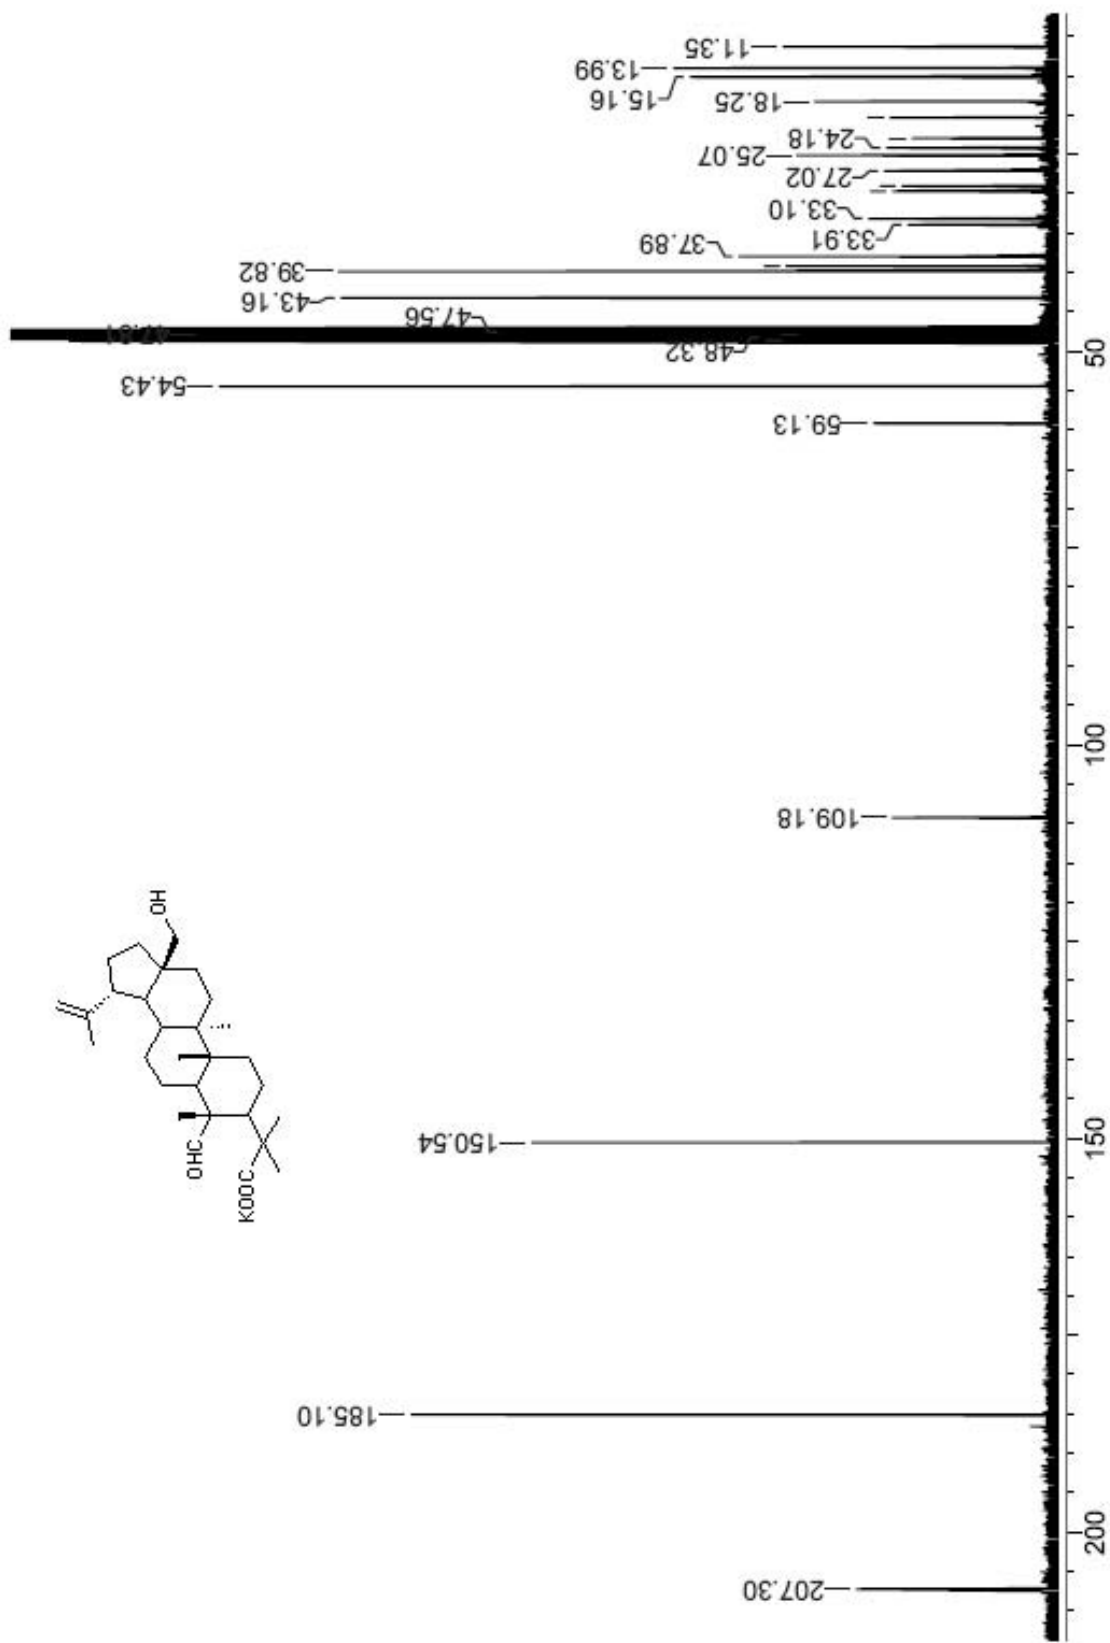

Potassium 28-hydroxy-1,3-seco-2-norlup-20-en-3-oate (22) CD<sub>3</sub>OD + 1wt% KOH/tms

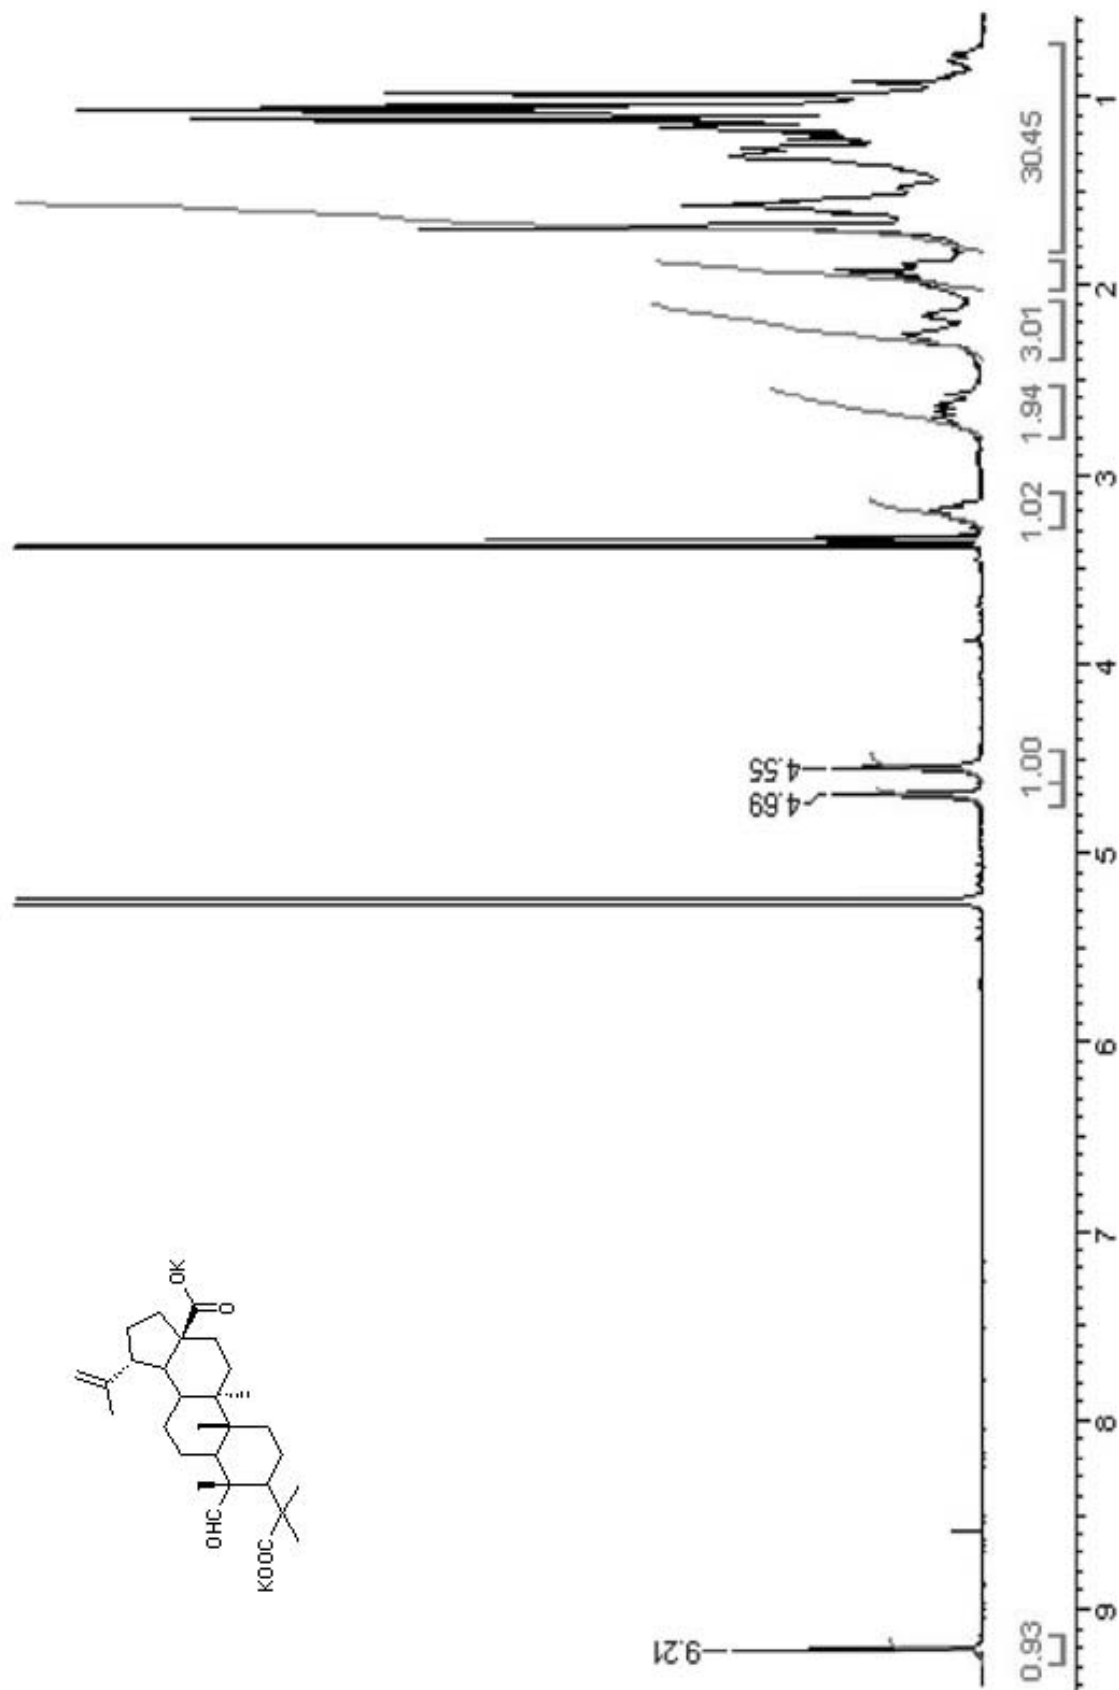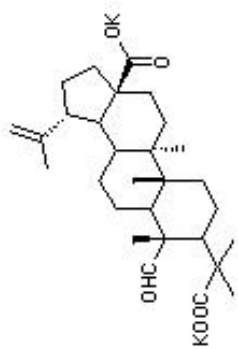

Potassium 1-oxo-1,3-seco-2-norlup-20-en-3,28-dioate (23) CD<sub>3</sub>OD + 1wt% KOH/tms

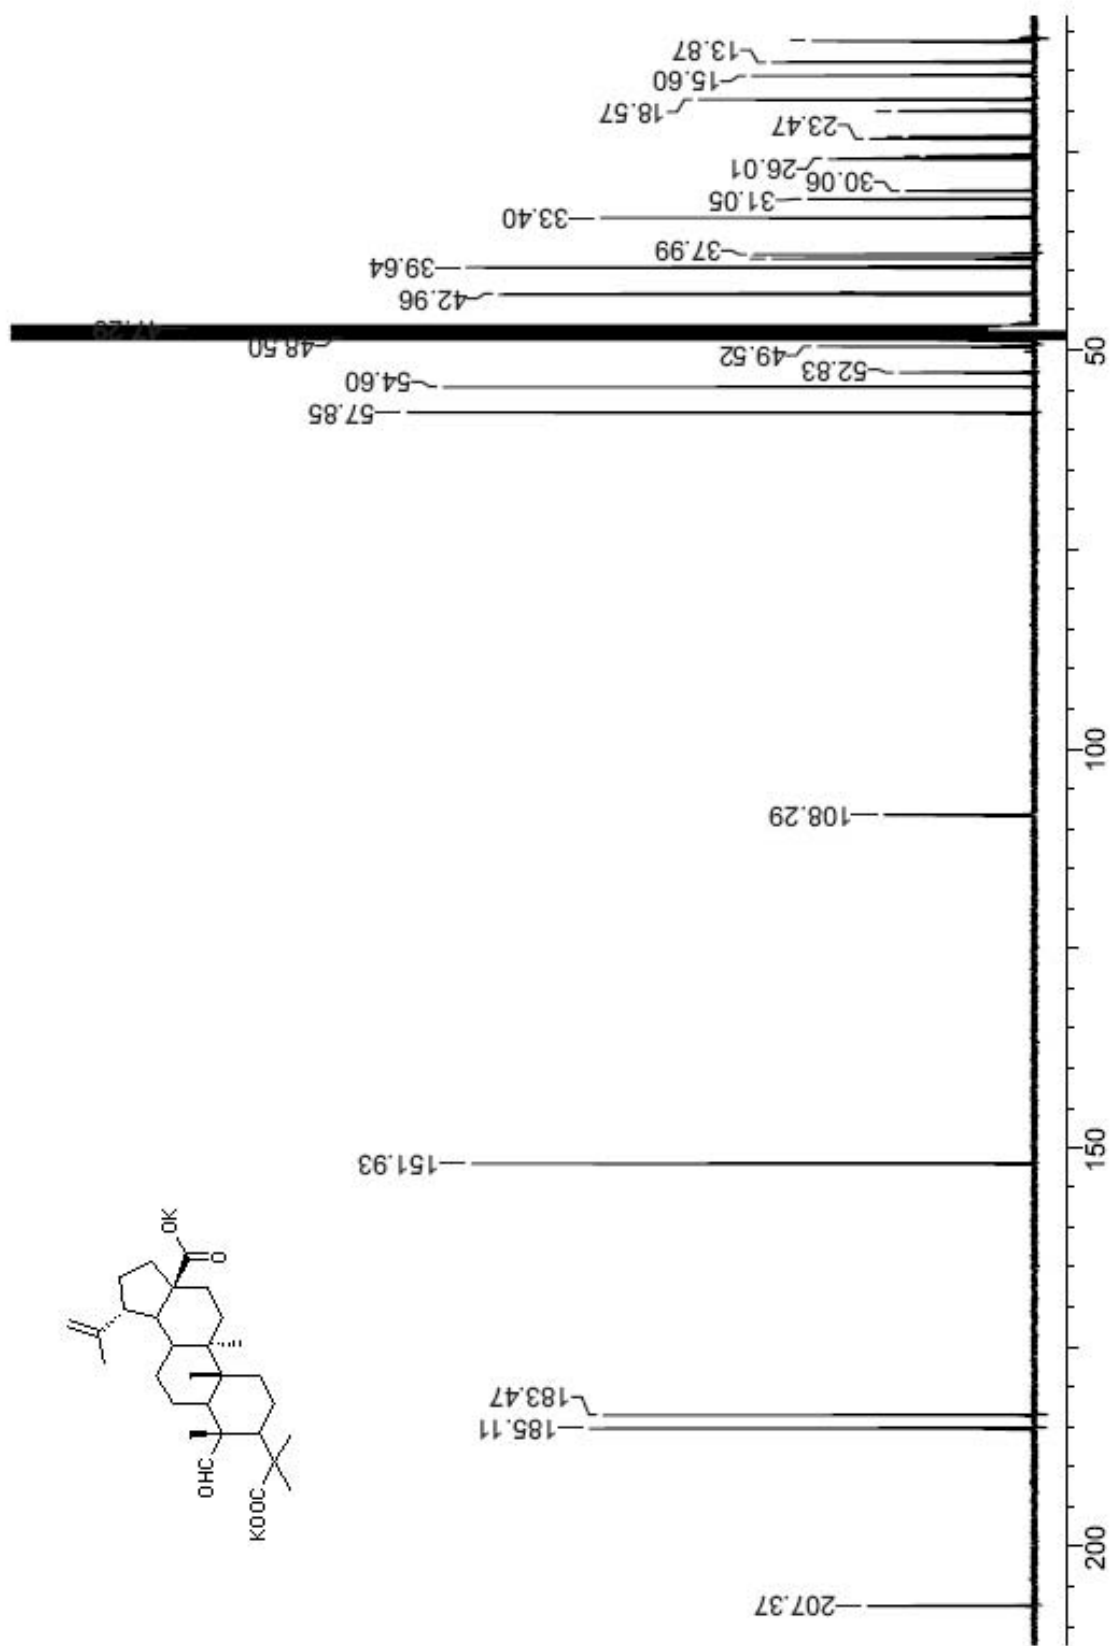

Potassium 1-oxo-1,3-seco-2-norlup-20-en-3,28-dioate (**23**) CD<sub>3</sub>OD + 1wt% KOH/tms



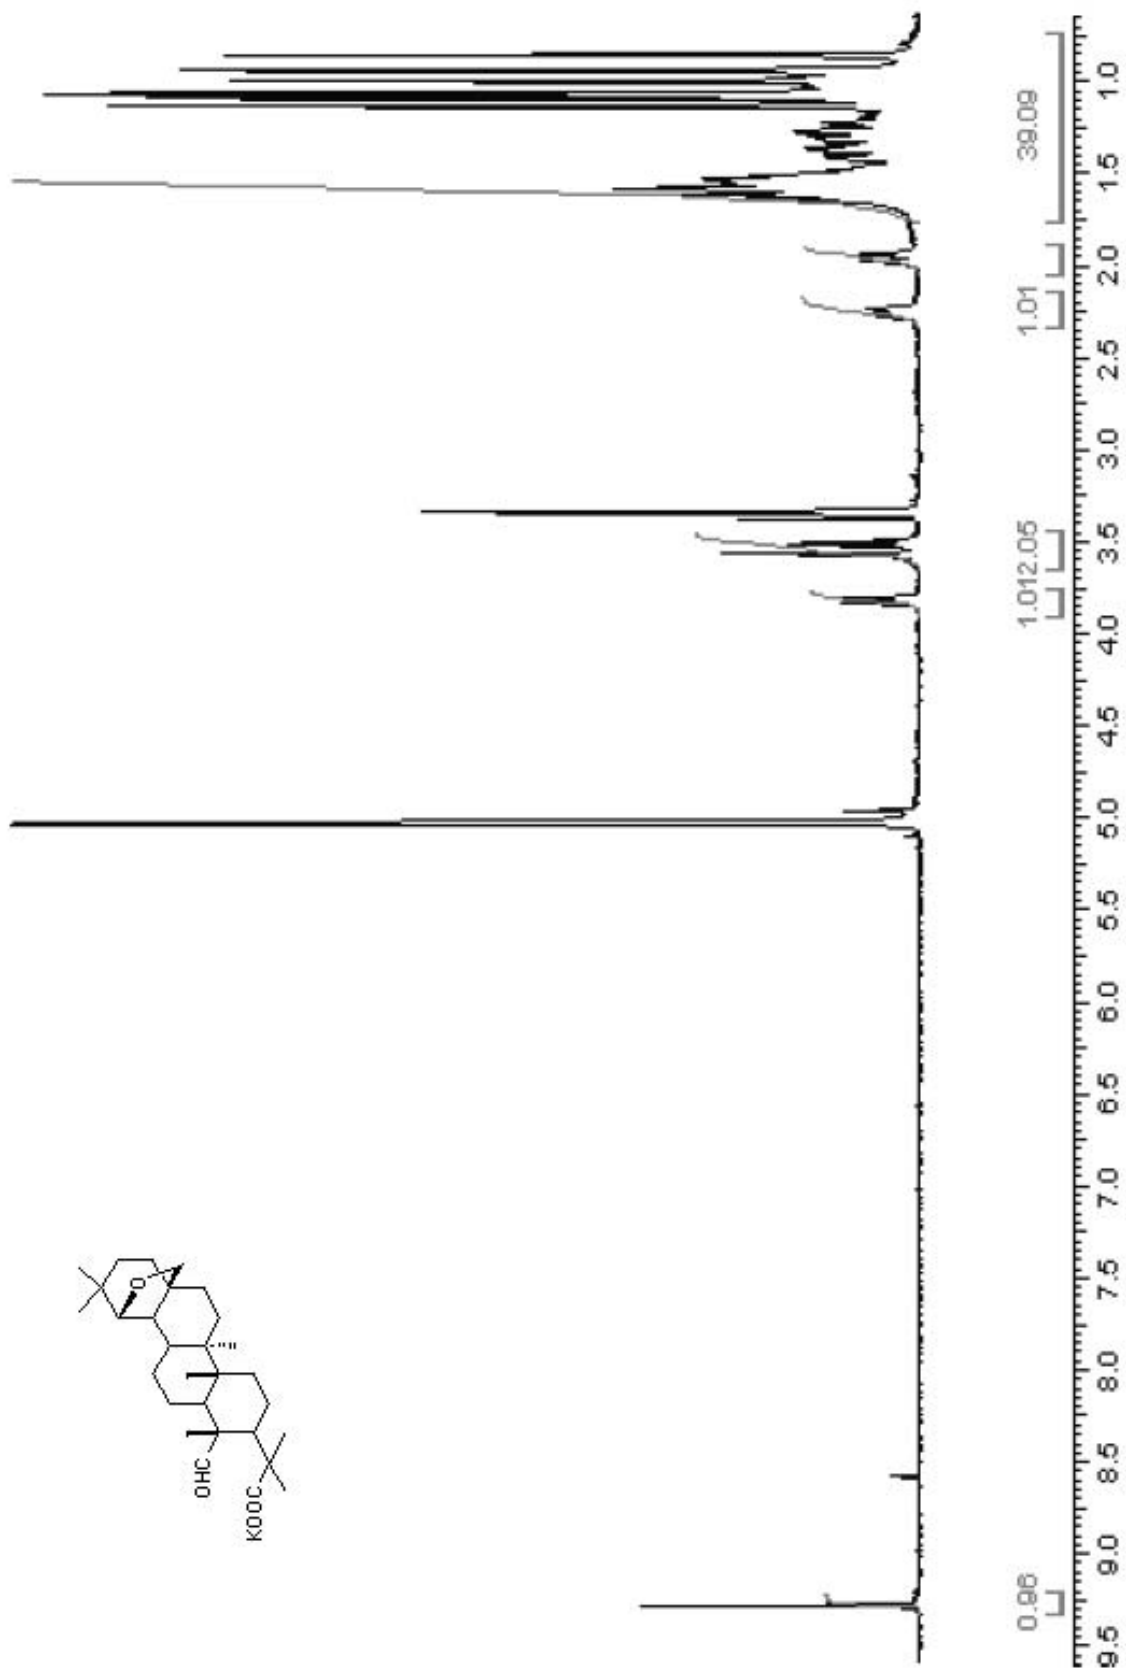

Potassium 19β,28-epoxy-1-oxo-2-nor-18α-oleanan-3-oate (**24**) CD<sub>3</sub>OD + 1wt% KOH/tms

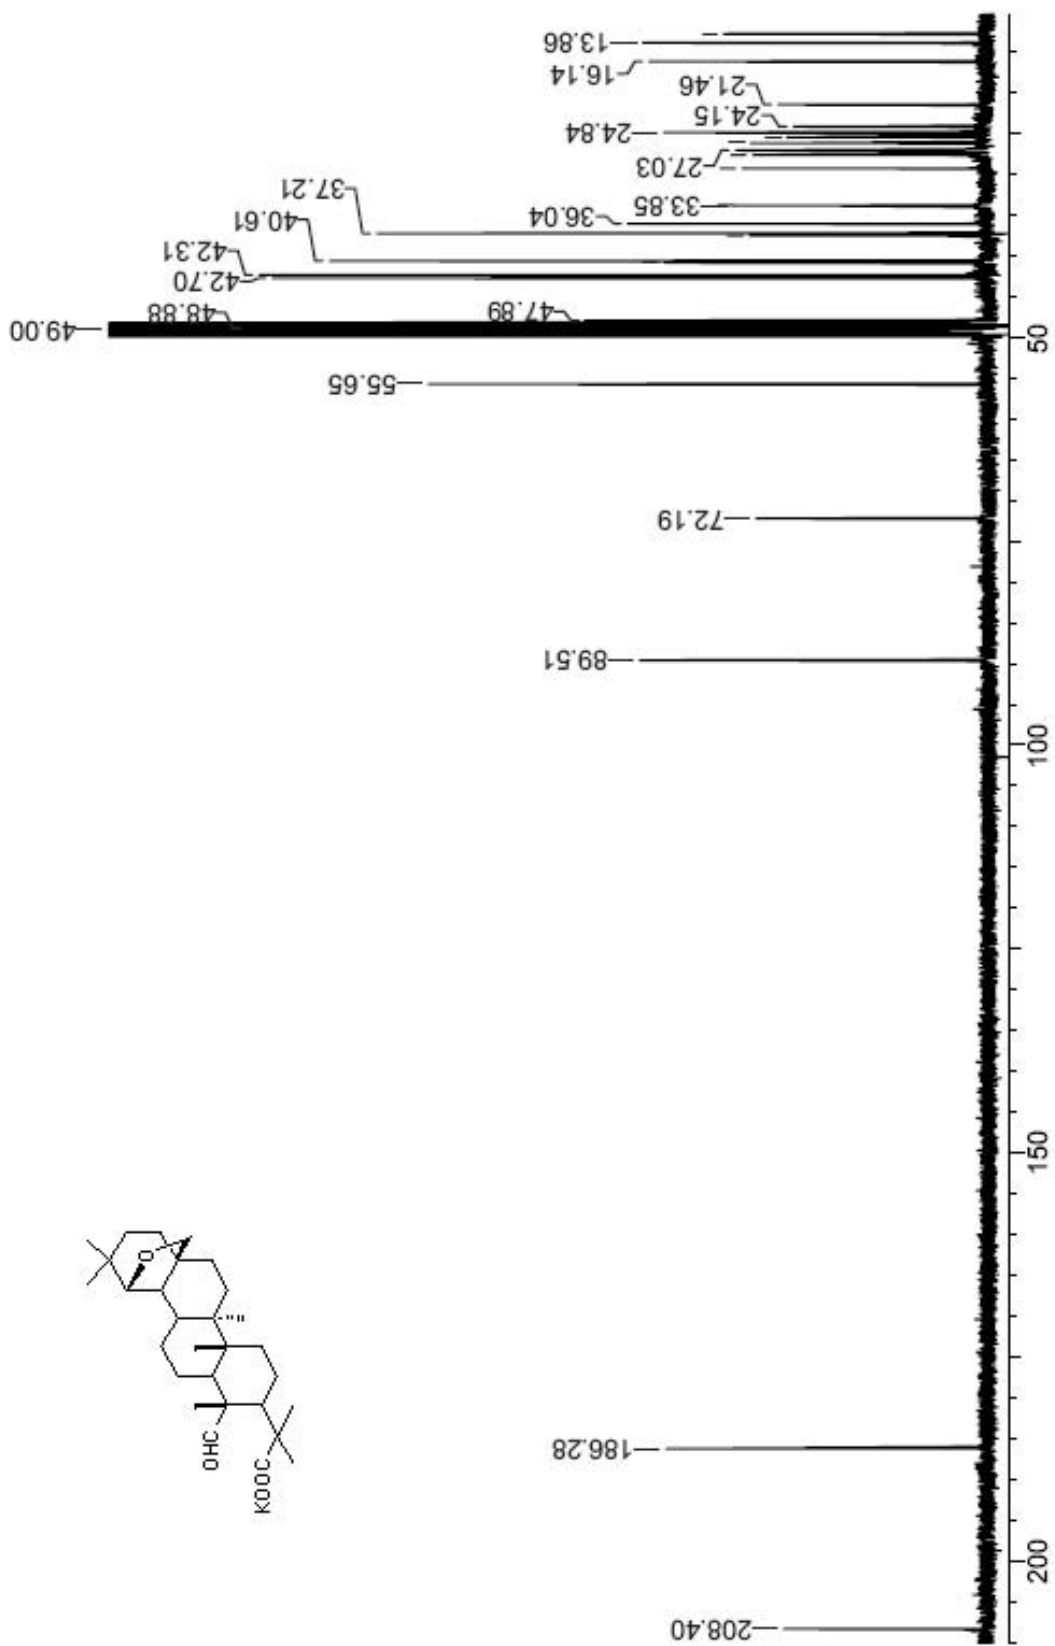

Potassium 19β,28-epoxy-1-oxo-2-nor-18α-oleanan-3-oate (**24**) CD<sub>3</sub>OD + 1wt% KOH/tms

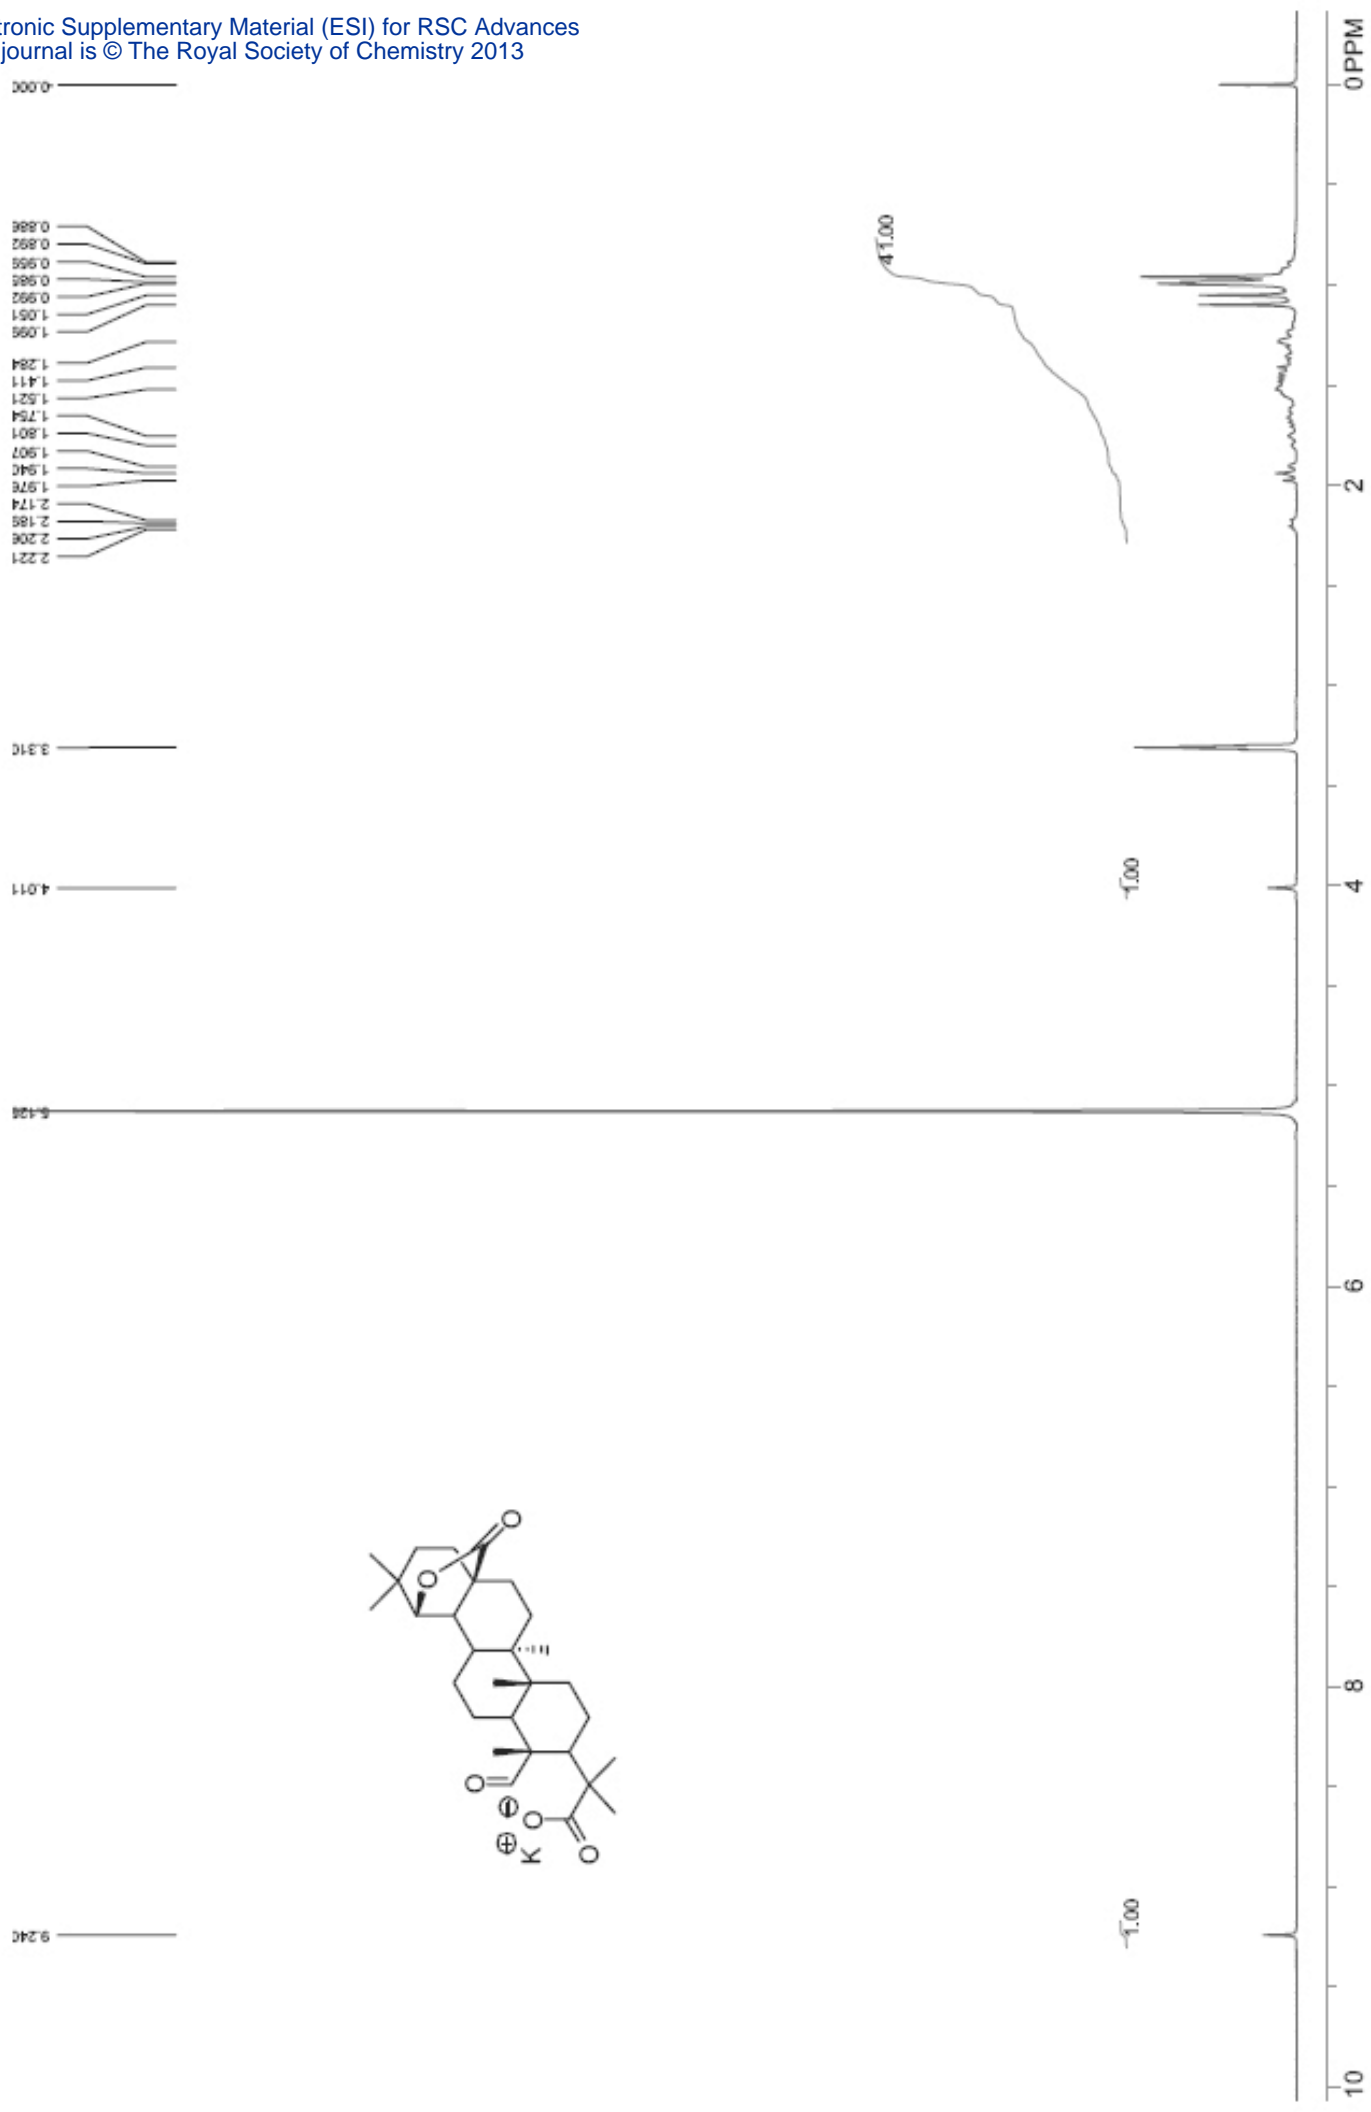

Potassium 19 $\beta$ ,28-epoxy-1,28-dioxo-1,3-seco-2-nor-18 $\alpha$ -oleanan-3-oate (25), CD<sub>3</sub>OD+1wt%KOH/tms

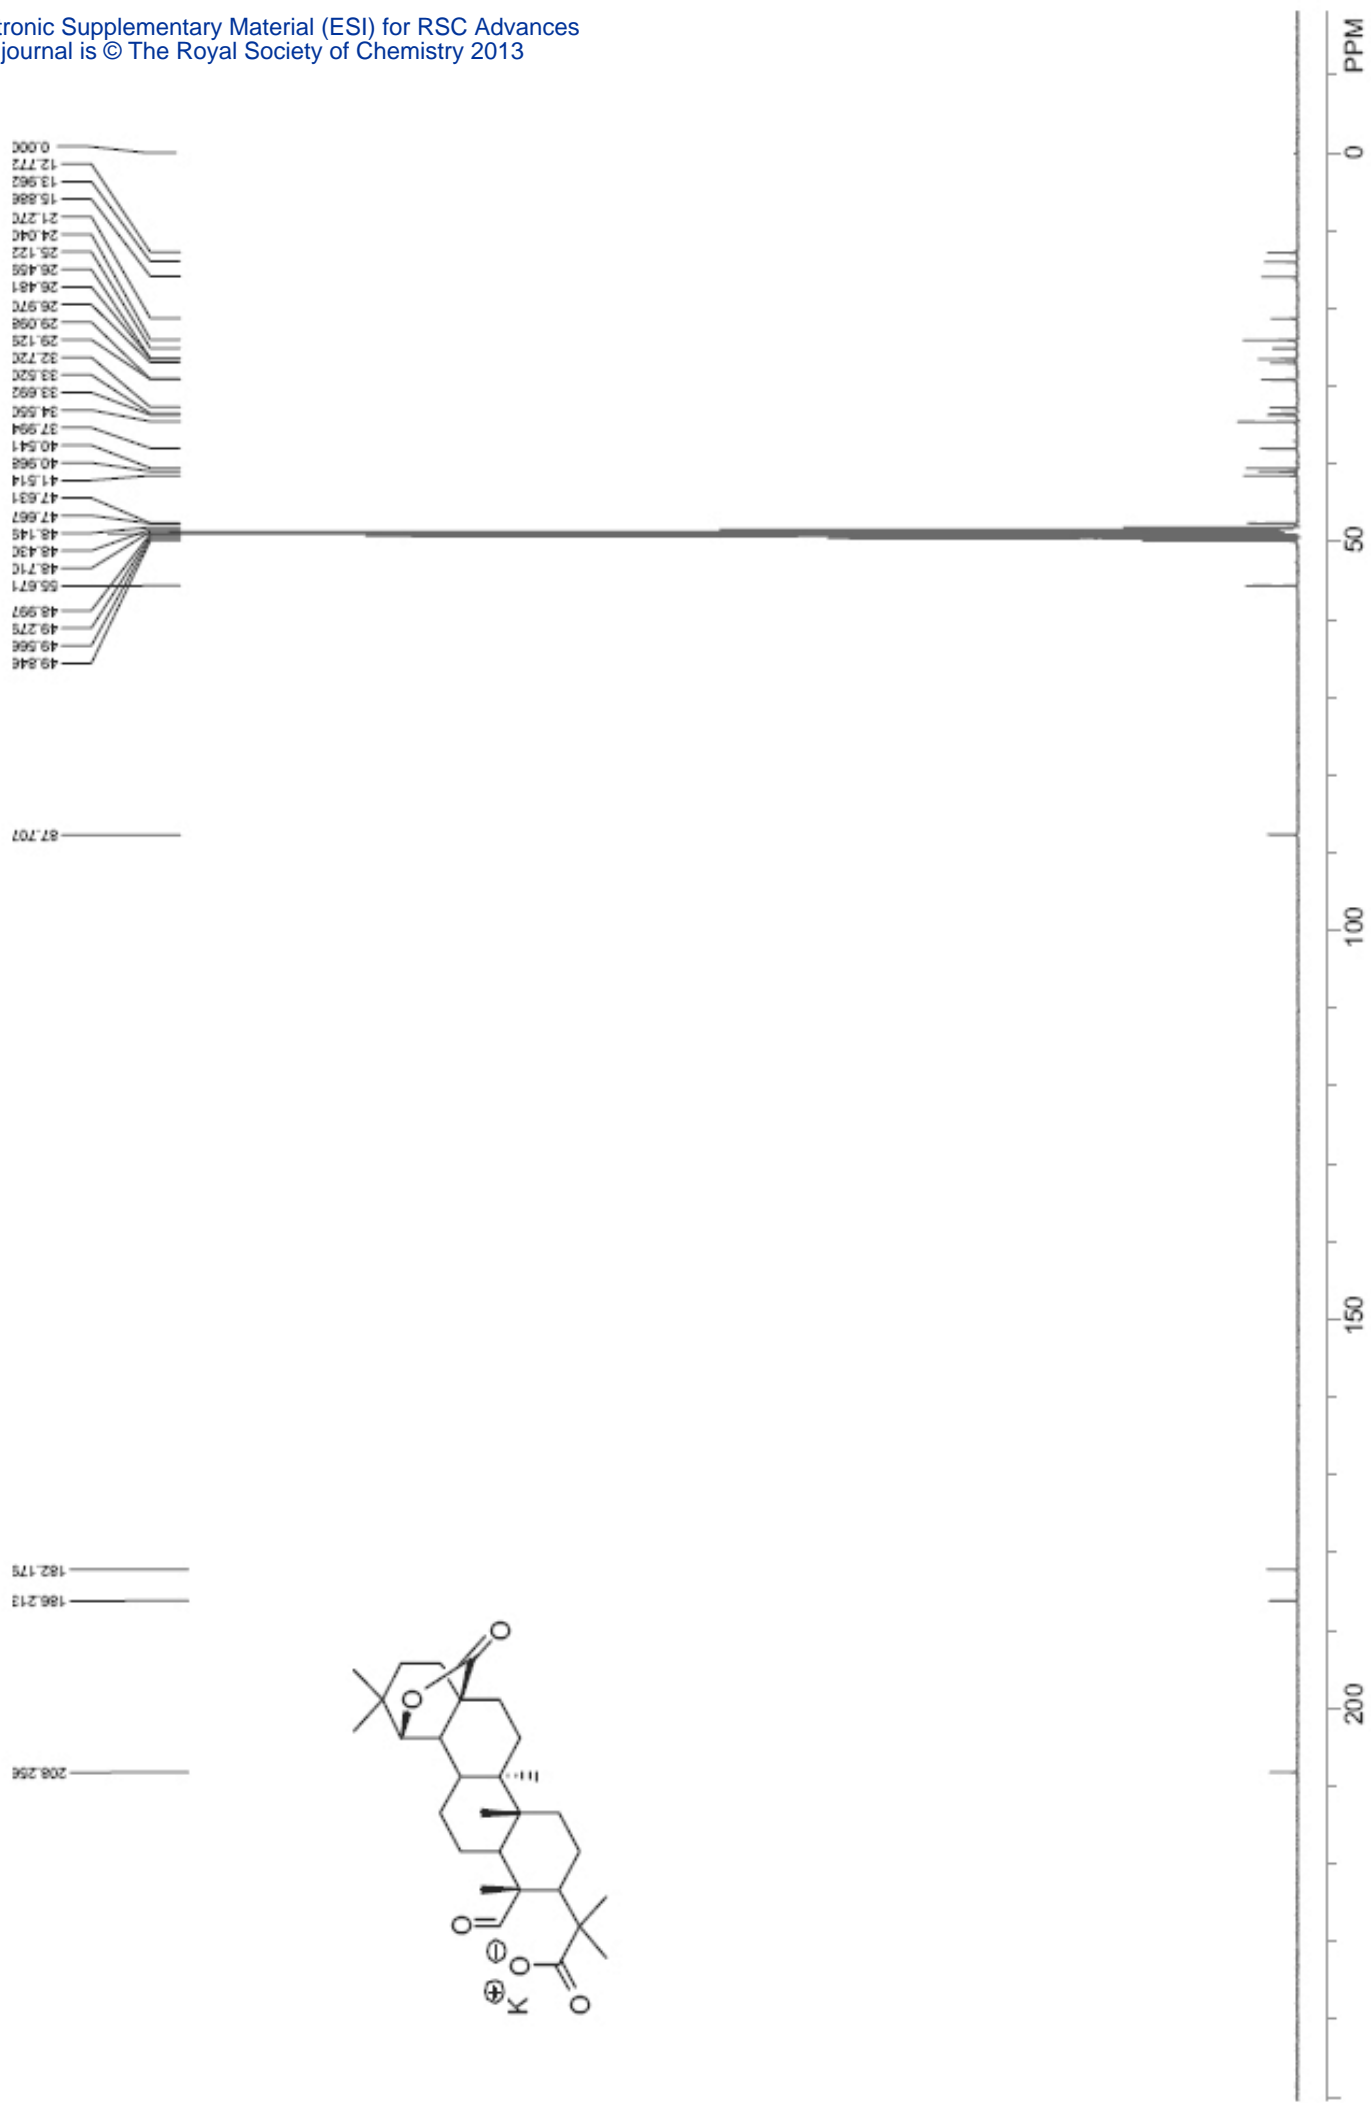

Potassium 19 $\beta$ ,28-epoxy-1,28-dioxo-1,3-seco-2-nor-18 $\alpha$ -oleanan-3-oate (25), CD<sub>3</sub>OD+1wt%KOH/tms

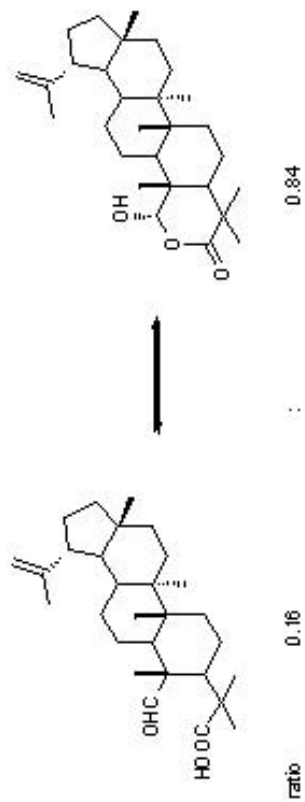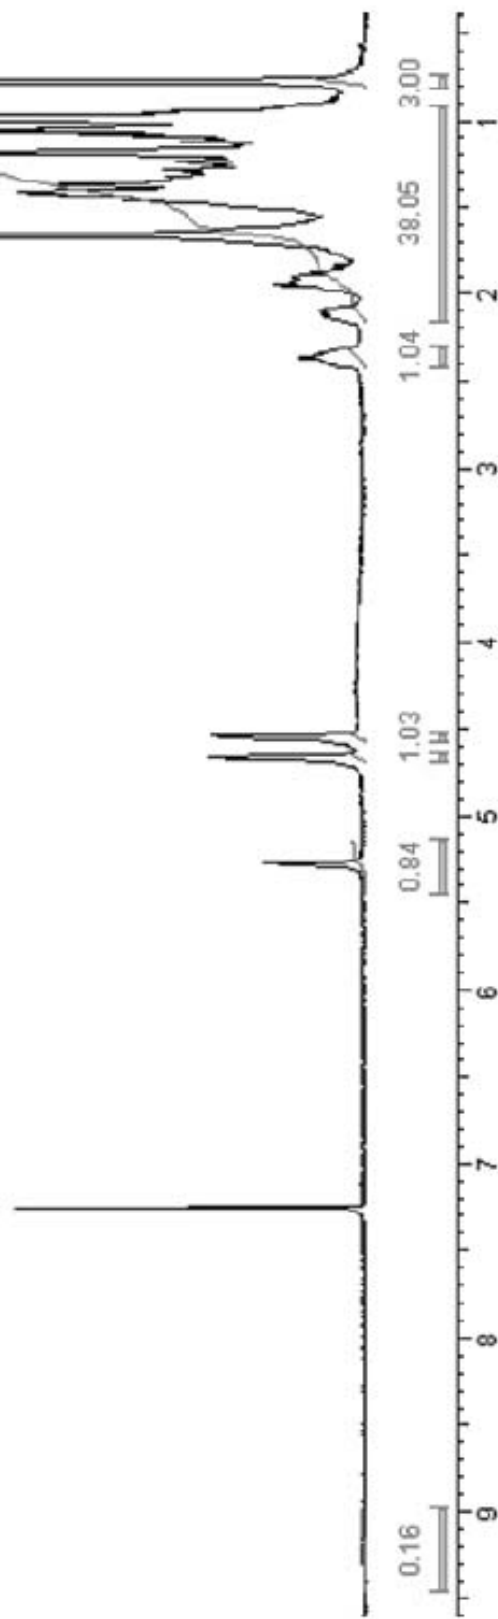

1-Oxo-2-nor-2,3-secolupan-3-oic acid (**26**)/1 $\alpha$ -Hydroxy-2-oxa-2-norlup-20-en-3-one (**31**),  $\text{CDCl}_3/\text{tms}$

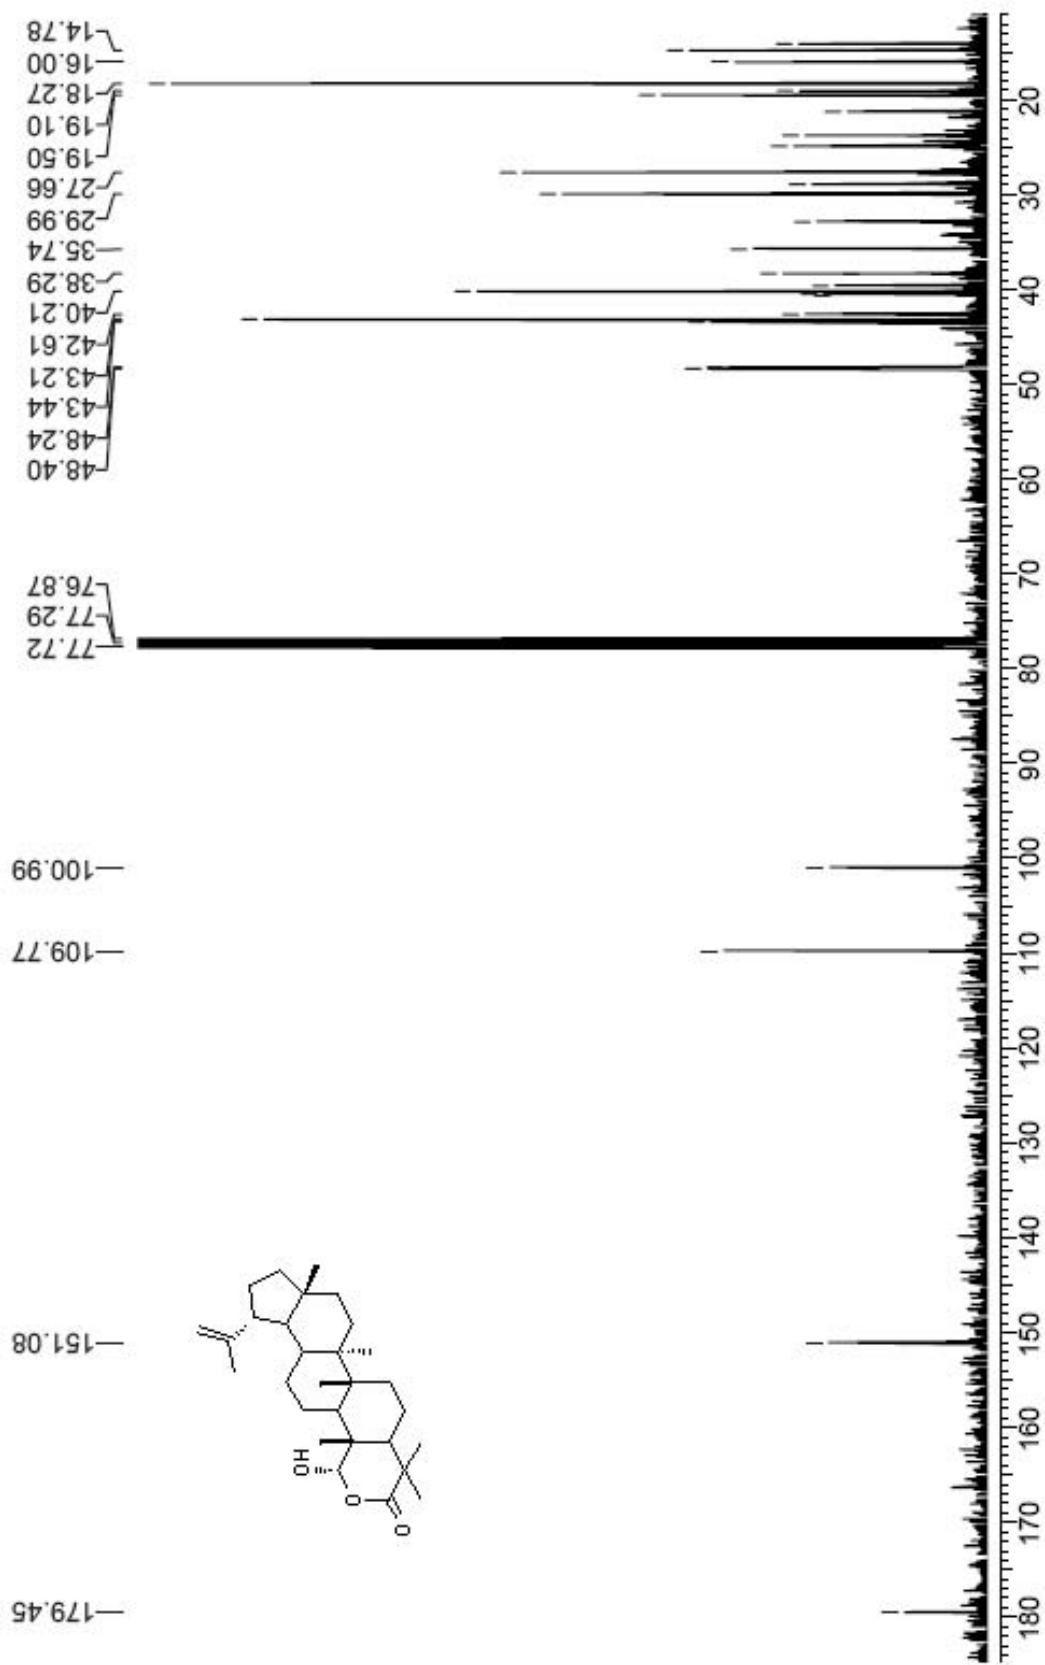

1α-Hydroxy-2-oxa-2-norlup-20-en-3-one (31), CDCl<sub>3</sub>/tms

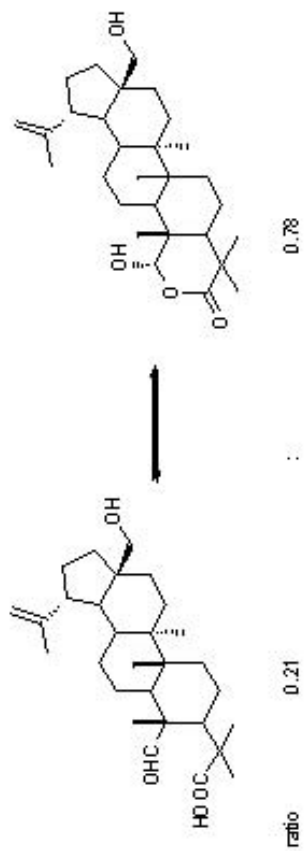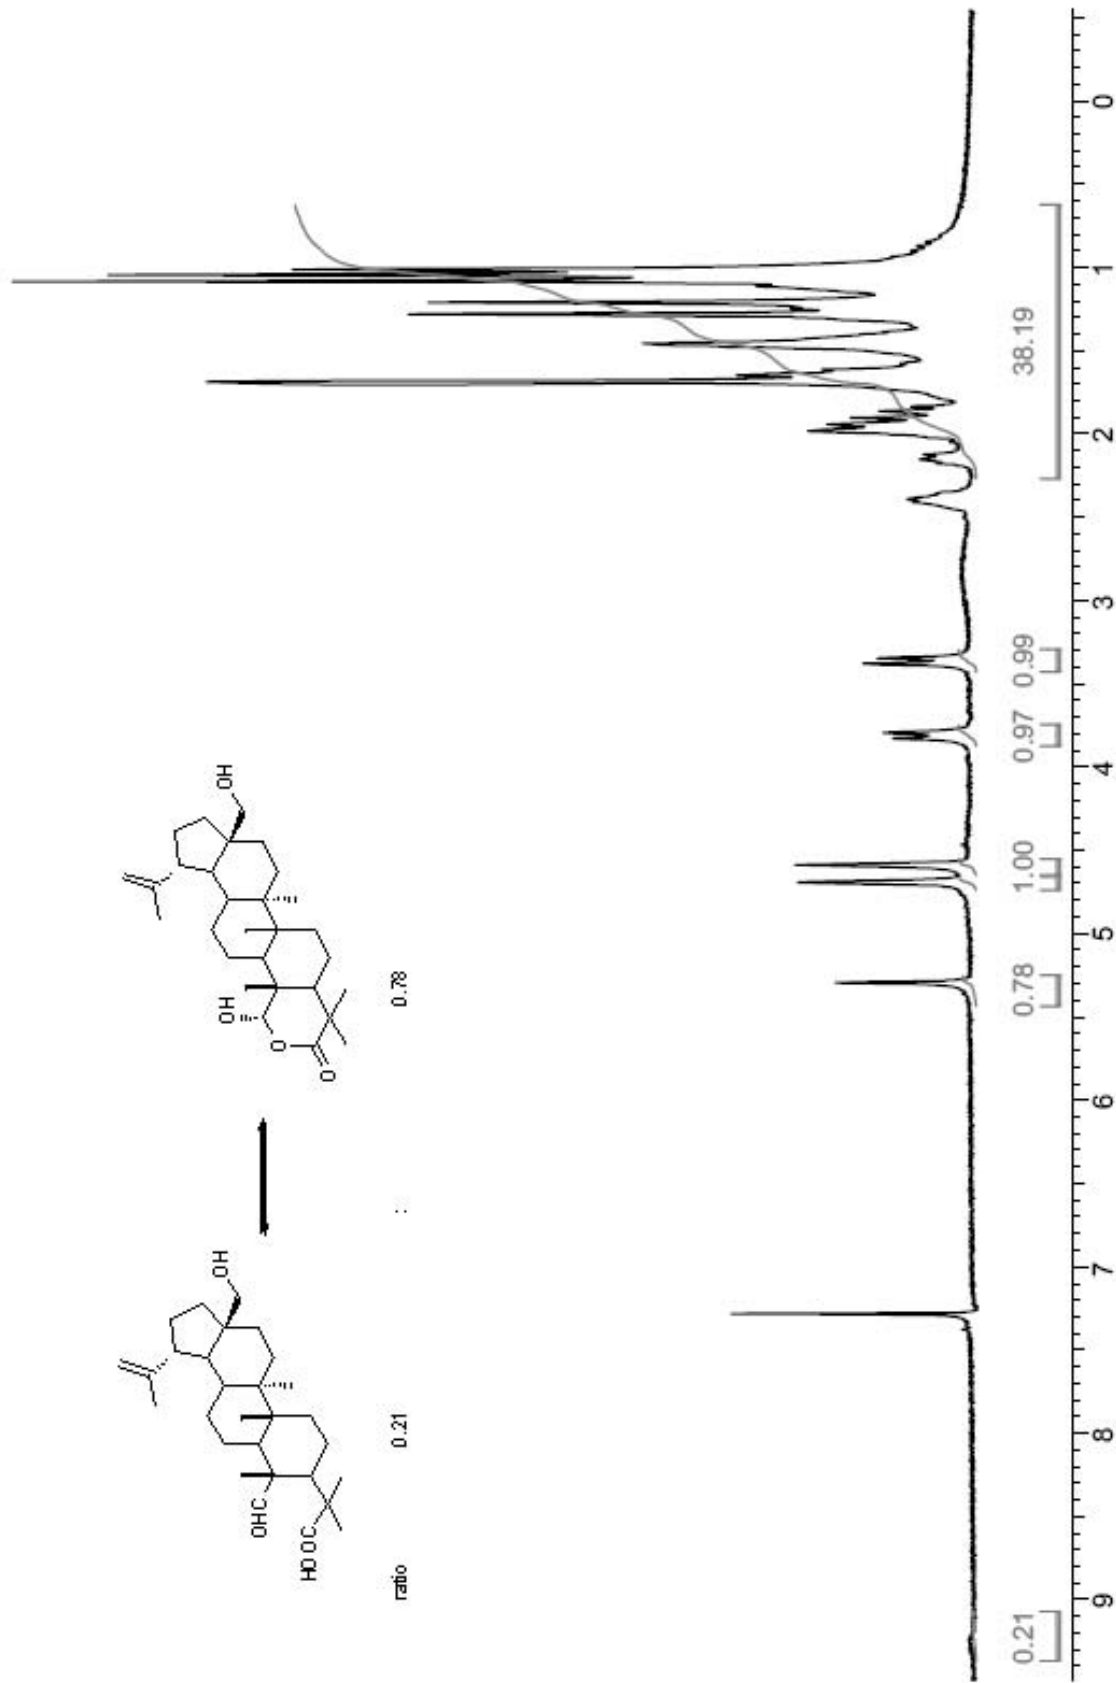

1-Oxo-28-hydroxy-1,3-seco-2-norlupan-3-oic acid (**27**)/1 $\alpha$ ,28-Dihydroxy-2-oxa-2-norlup-20-en-3-one (**32**),  $\text{CDCl}_3/\text{tms}$

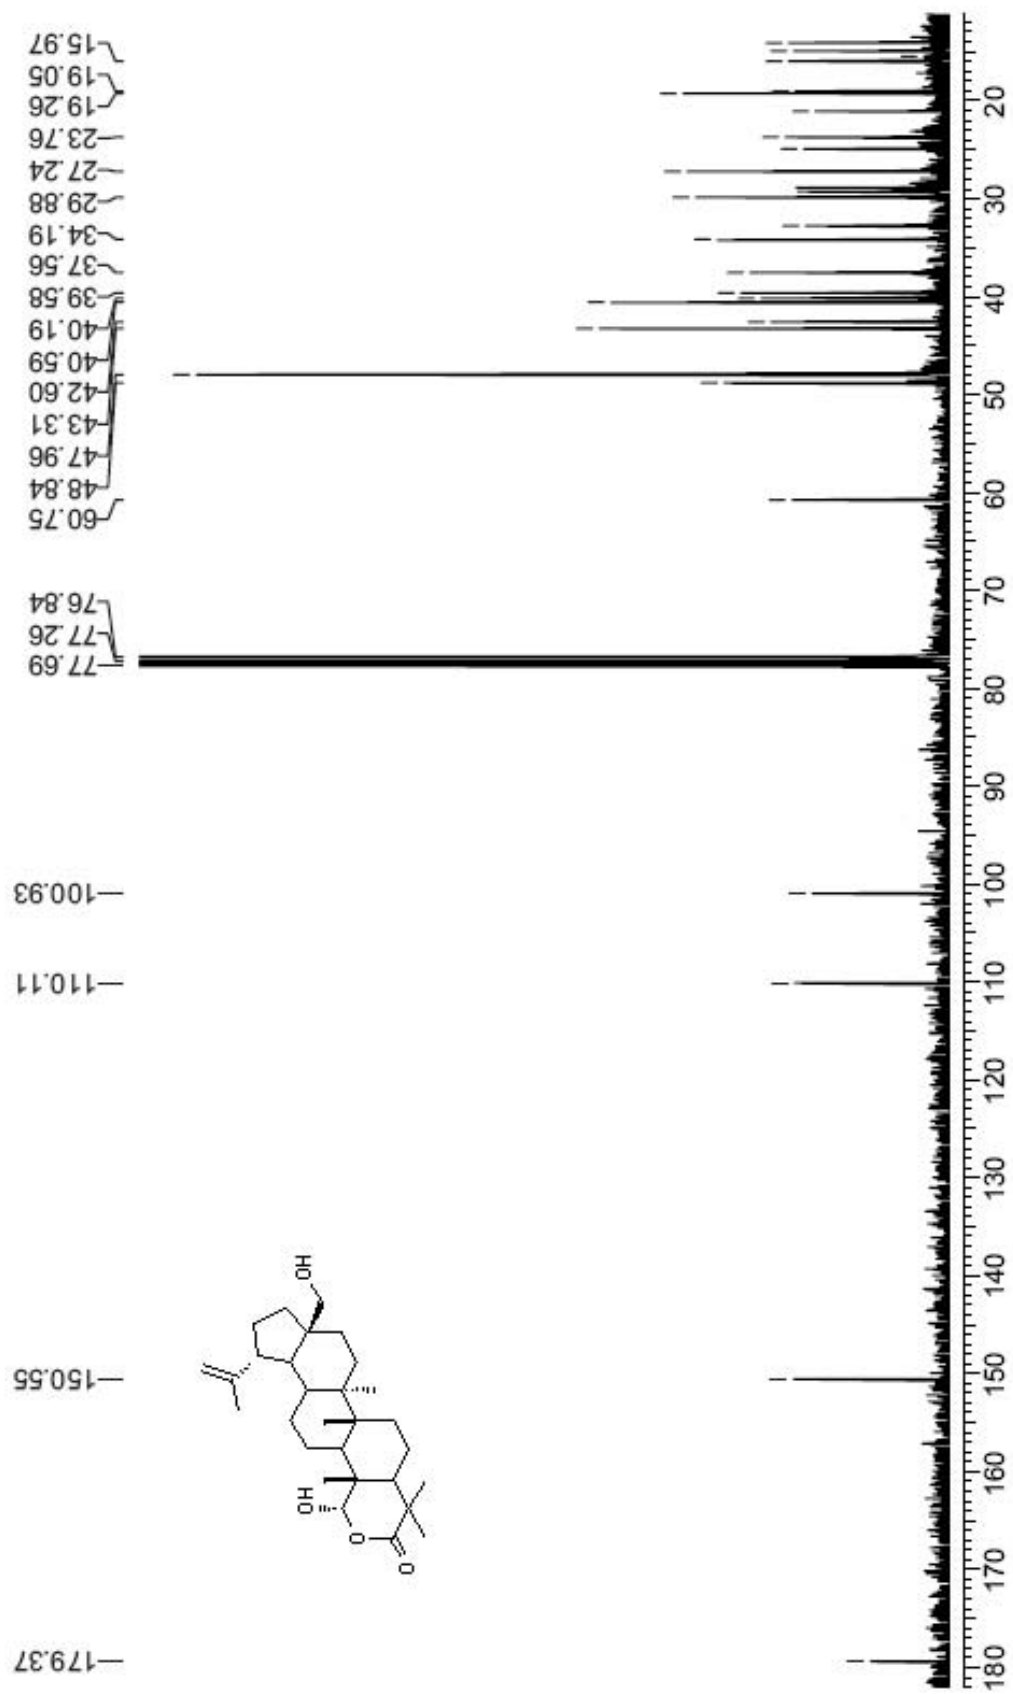

1α,28-Dihydroxy-2-oxa-2-norlup-20-en-3-one (32), CDCl<sub>3</sub>/tms



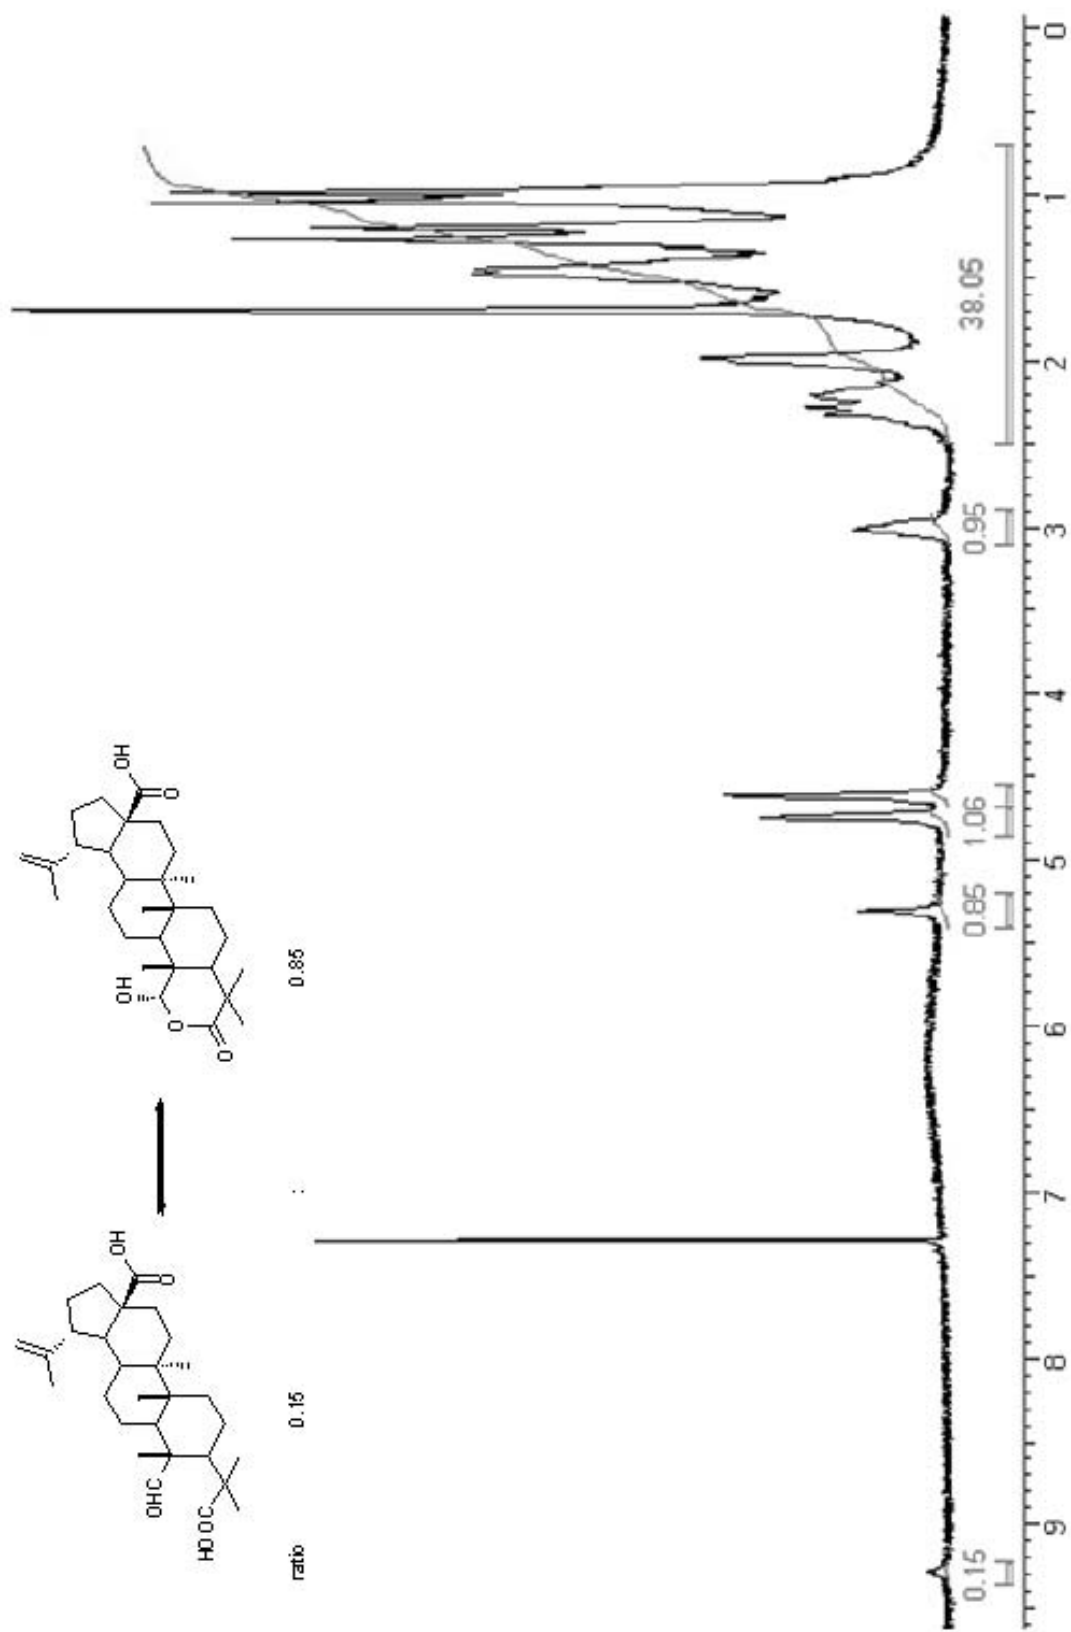

1-Oxo-1,3-seco-2-norlup-20-en-3,28-dioic acid (28)/1β-Hydroxy-2-oxolup-20-en-3-oxolup-20-en-28-oic acid (33), CDCl<sub>3</sub>/tms

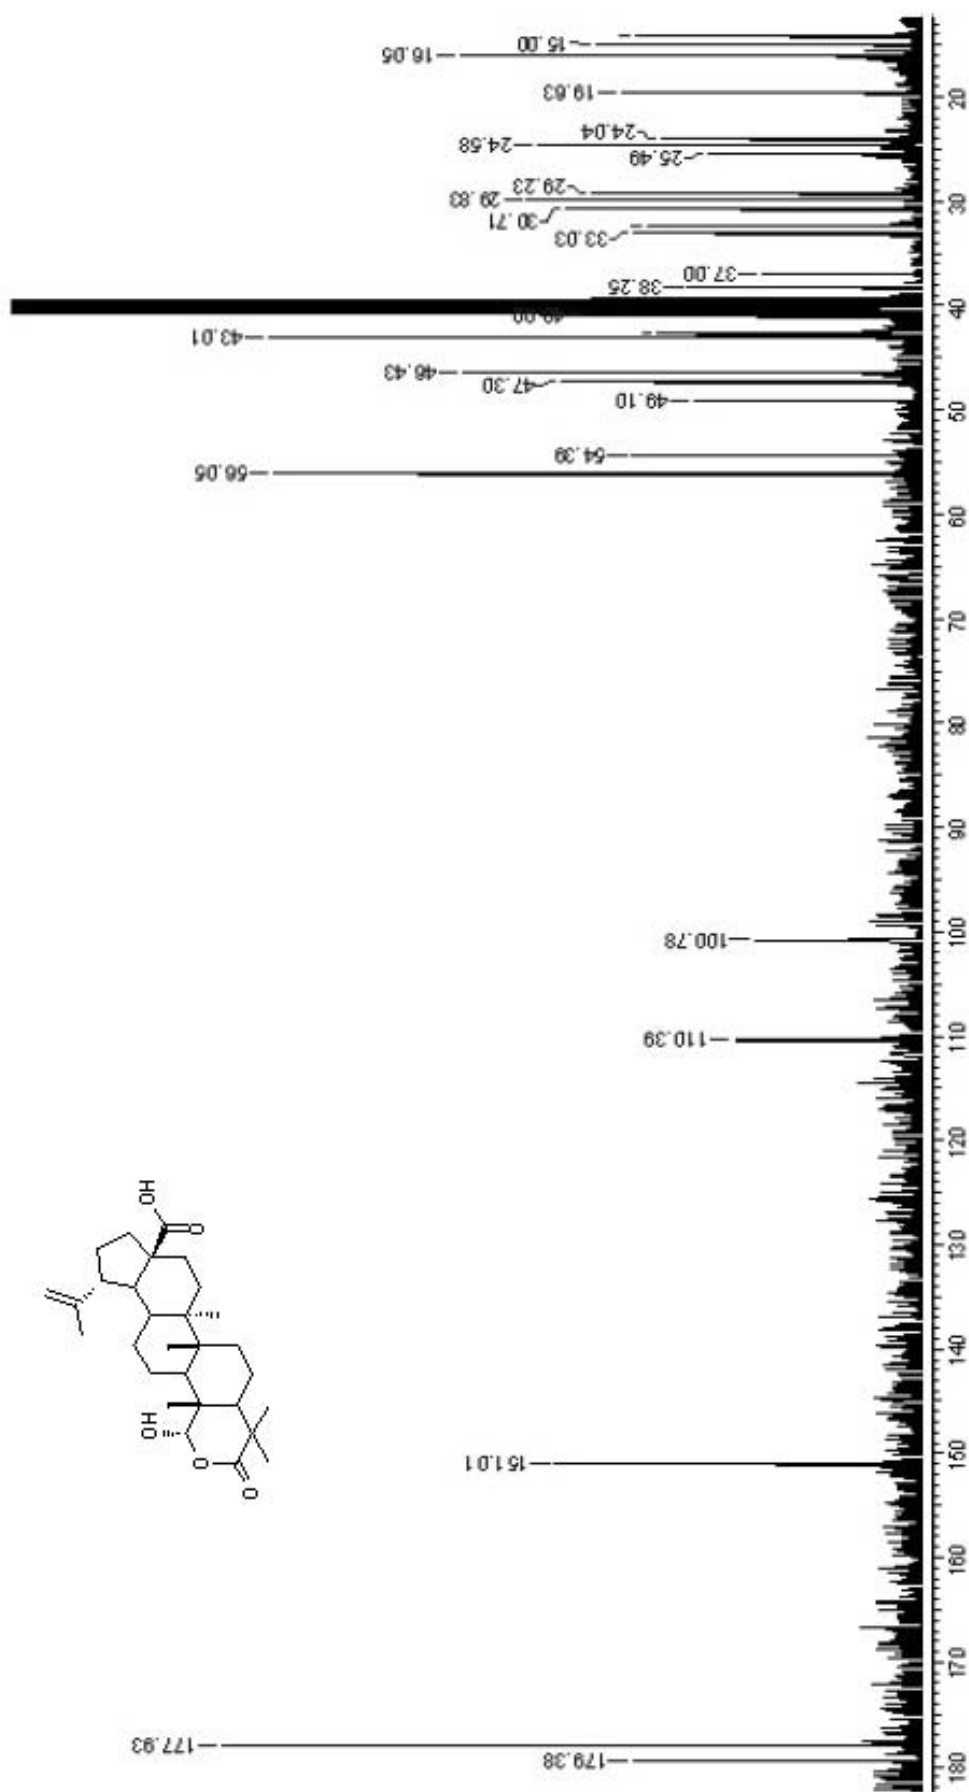

1β-Hydroxy-2-oxa-3-oxolup-20-en-28-oic acid (33), DMSO-d<sub>6</sub>/tms

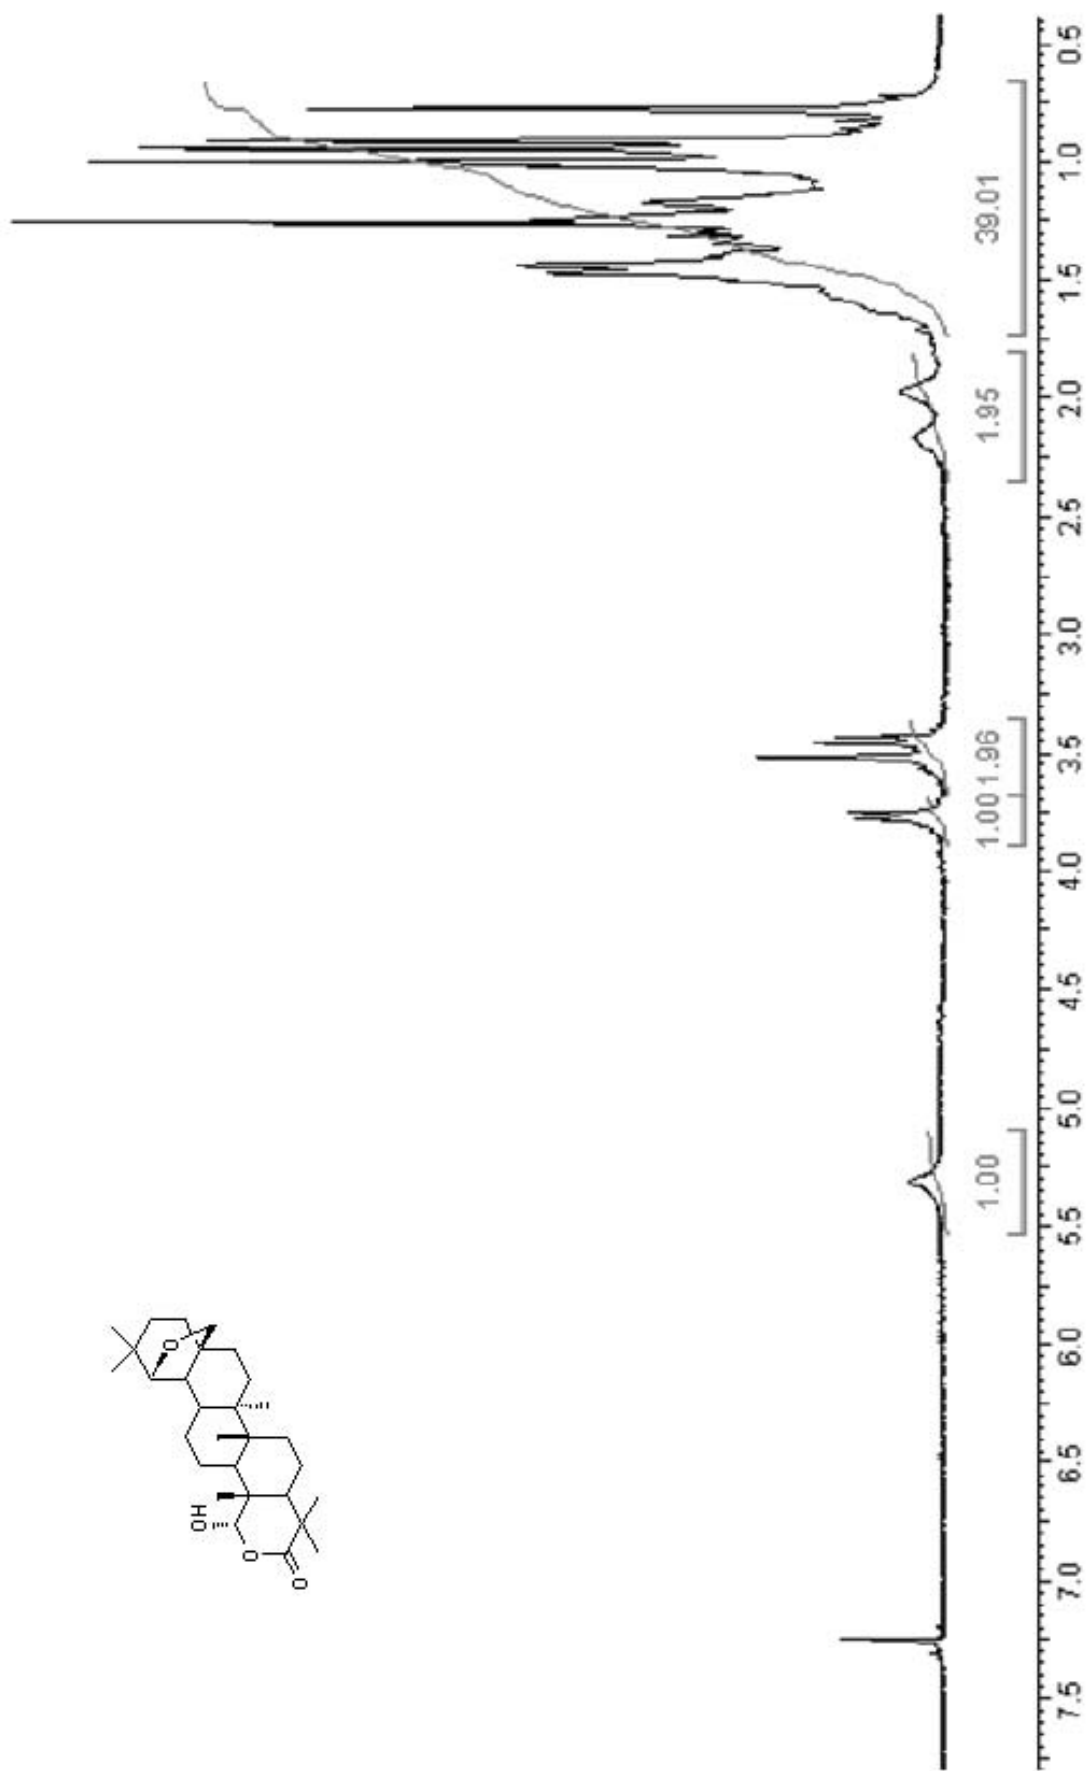

19 $\beta$ ,28-Epoxy-1 $\alpha$ -hydroxy-2-oxa-2-nor-18 $\alpha$ -oleanan-3-one (**34**), CDCl<sub>3</sub>/tms

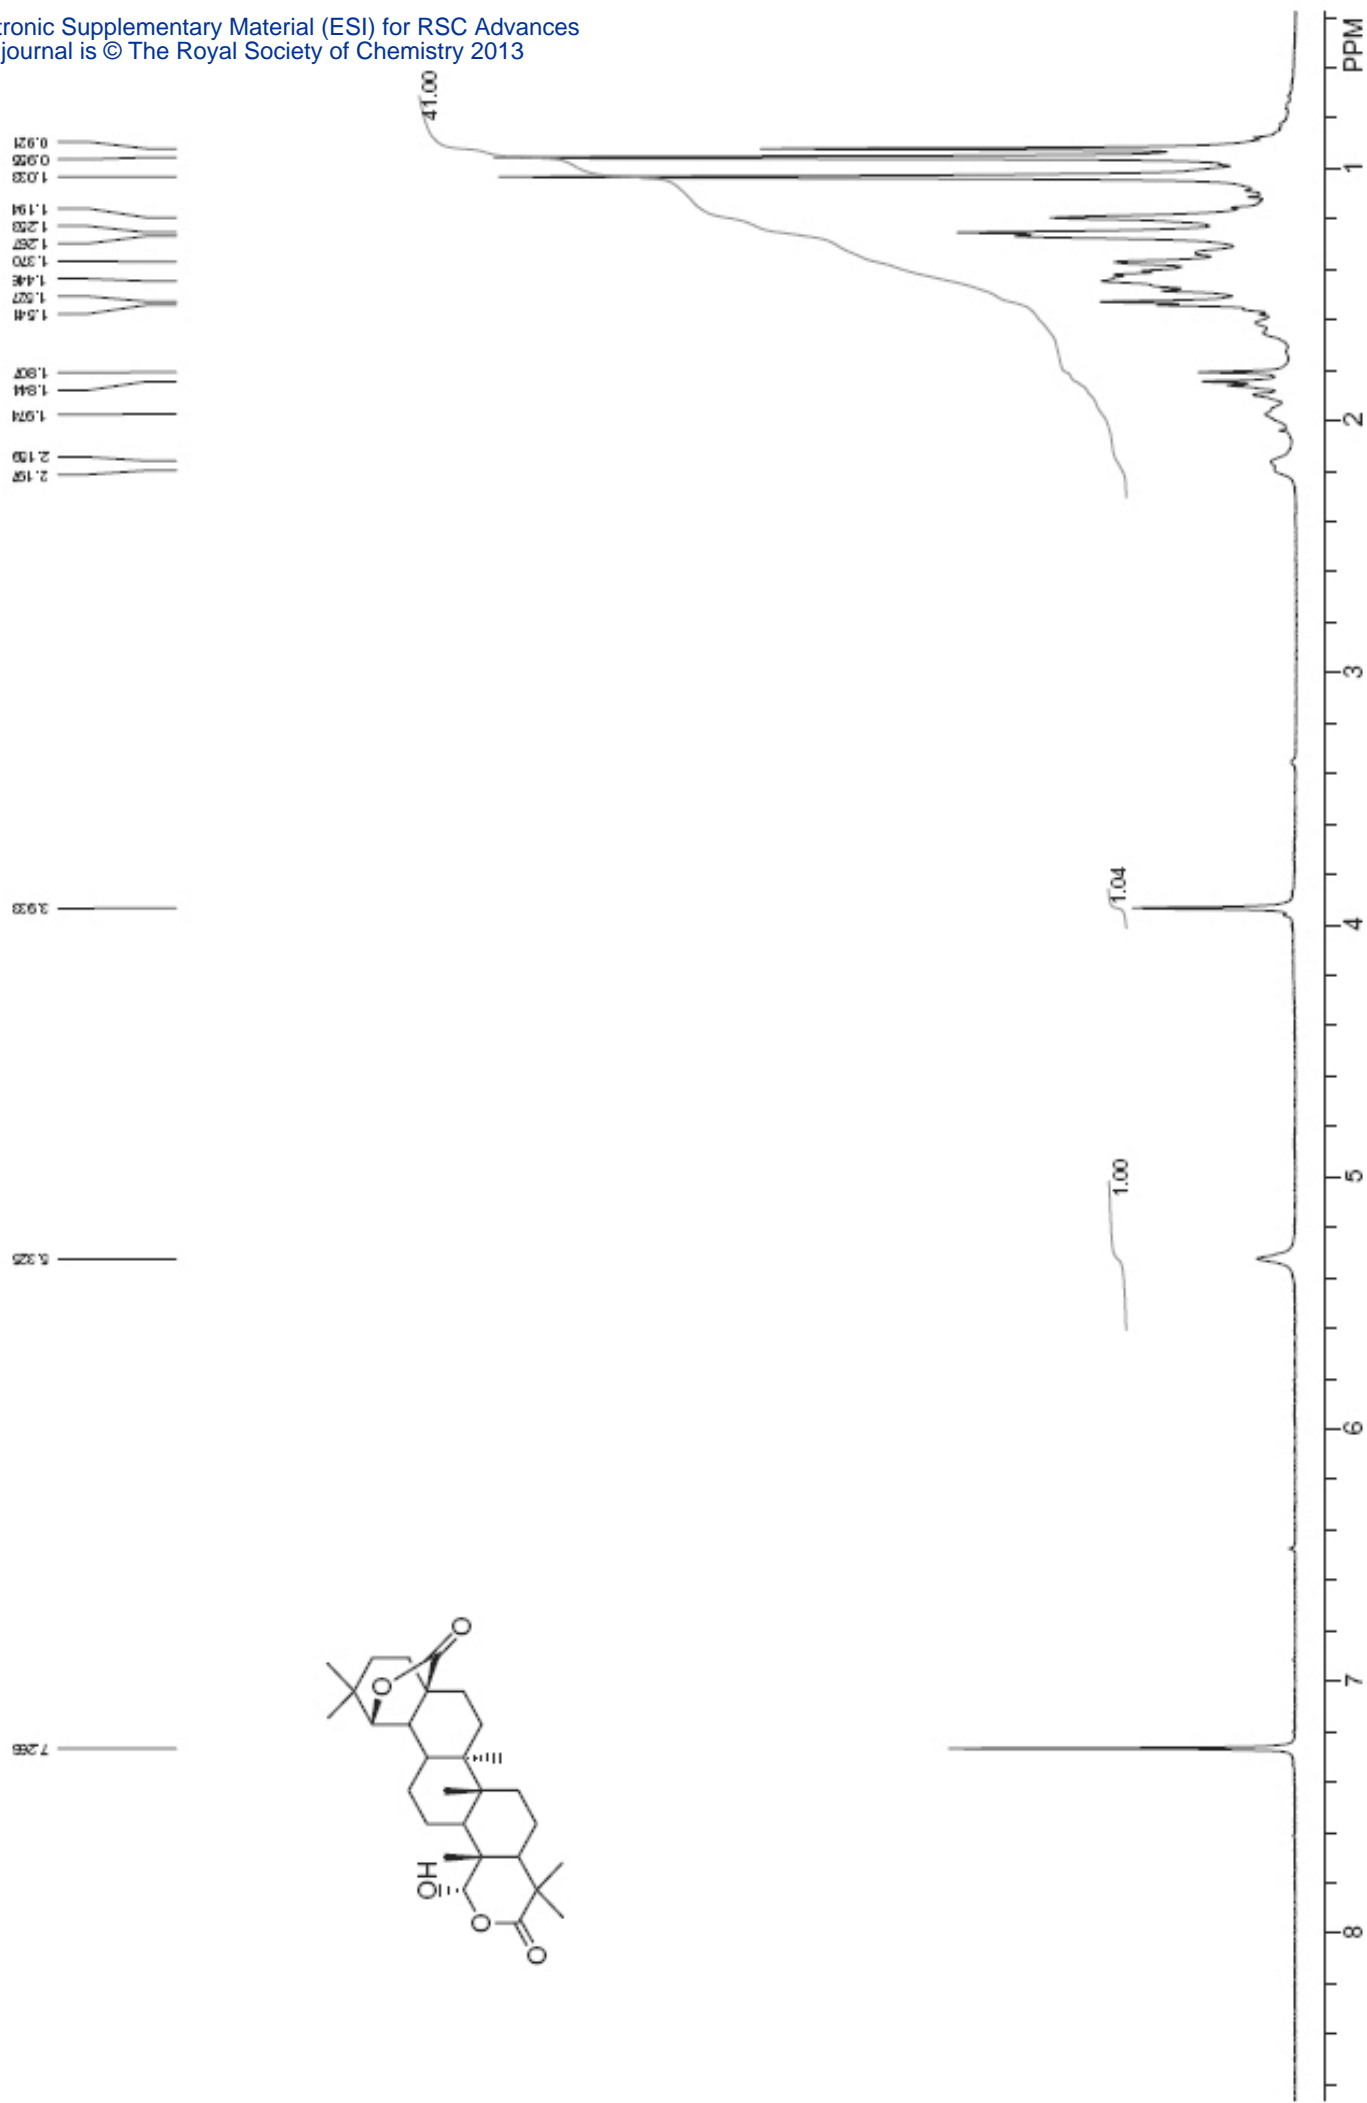

1-Hydroxy-2-oxa-3-oxo-2-nor-18α-oleanan-28,19β-olide (**35**), CDCl<sub>3</sub>/tms

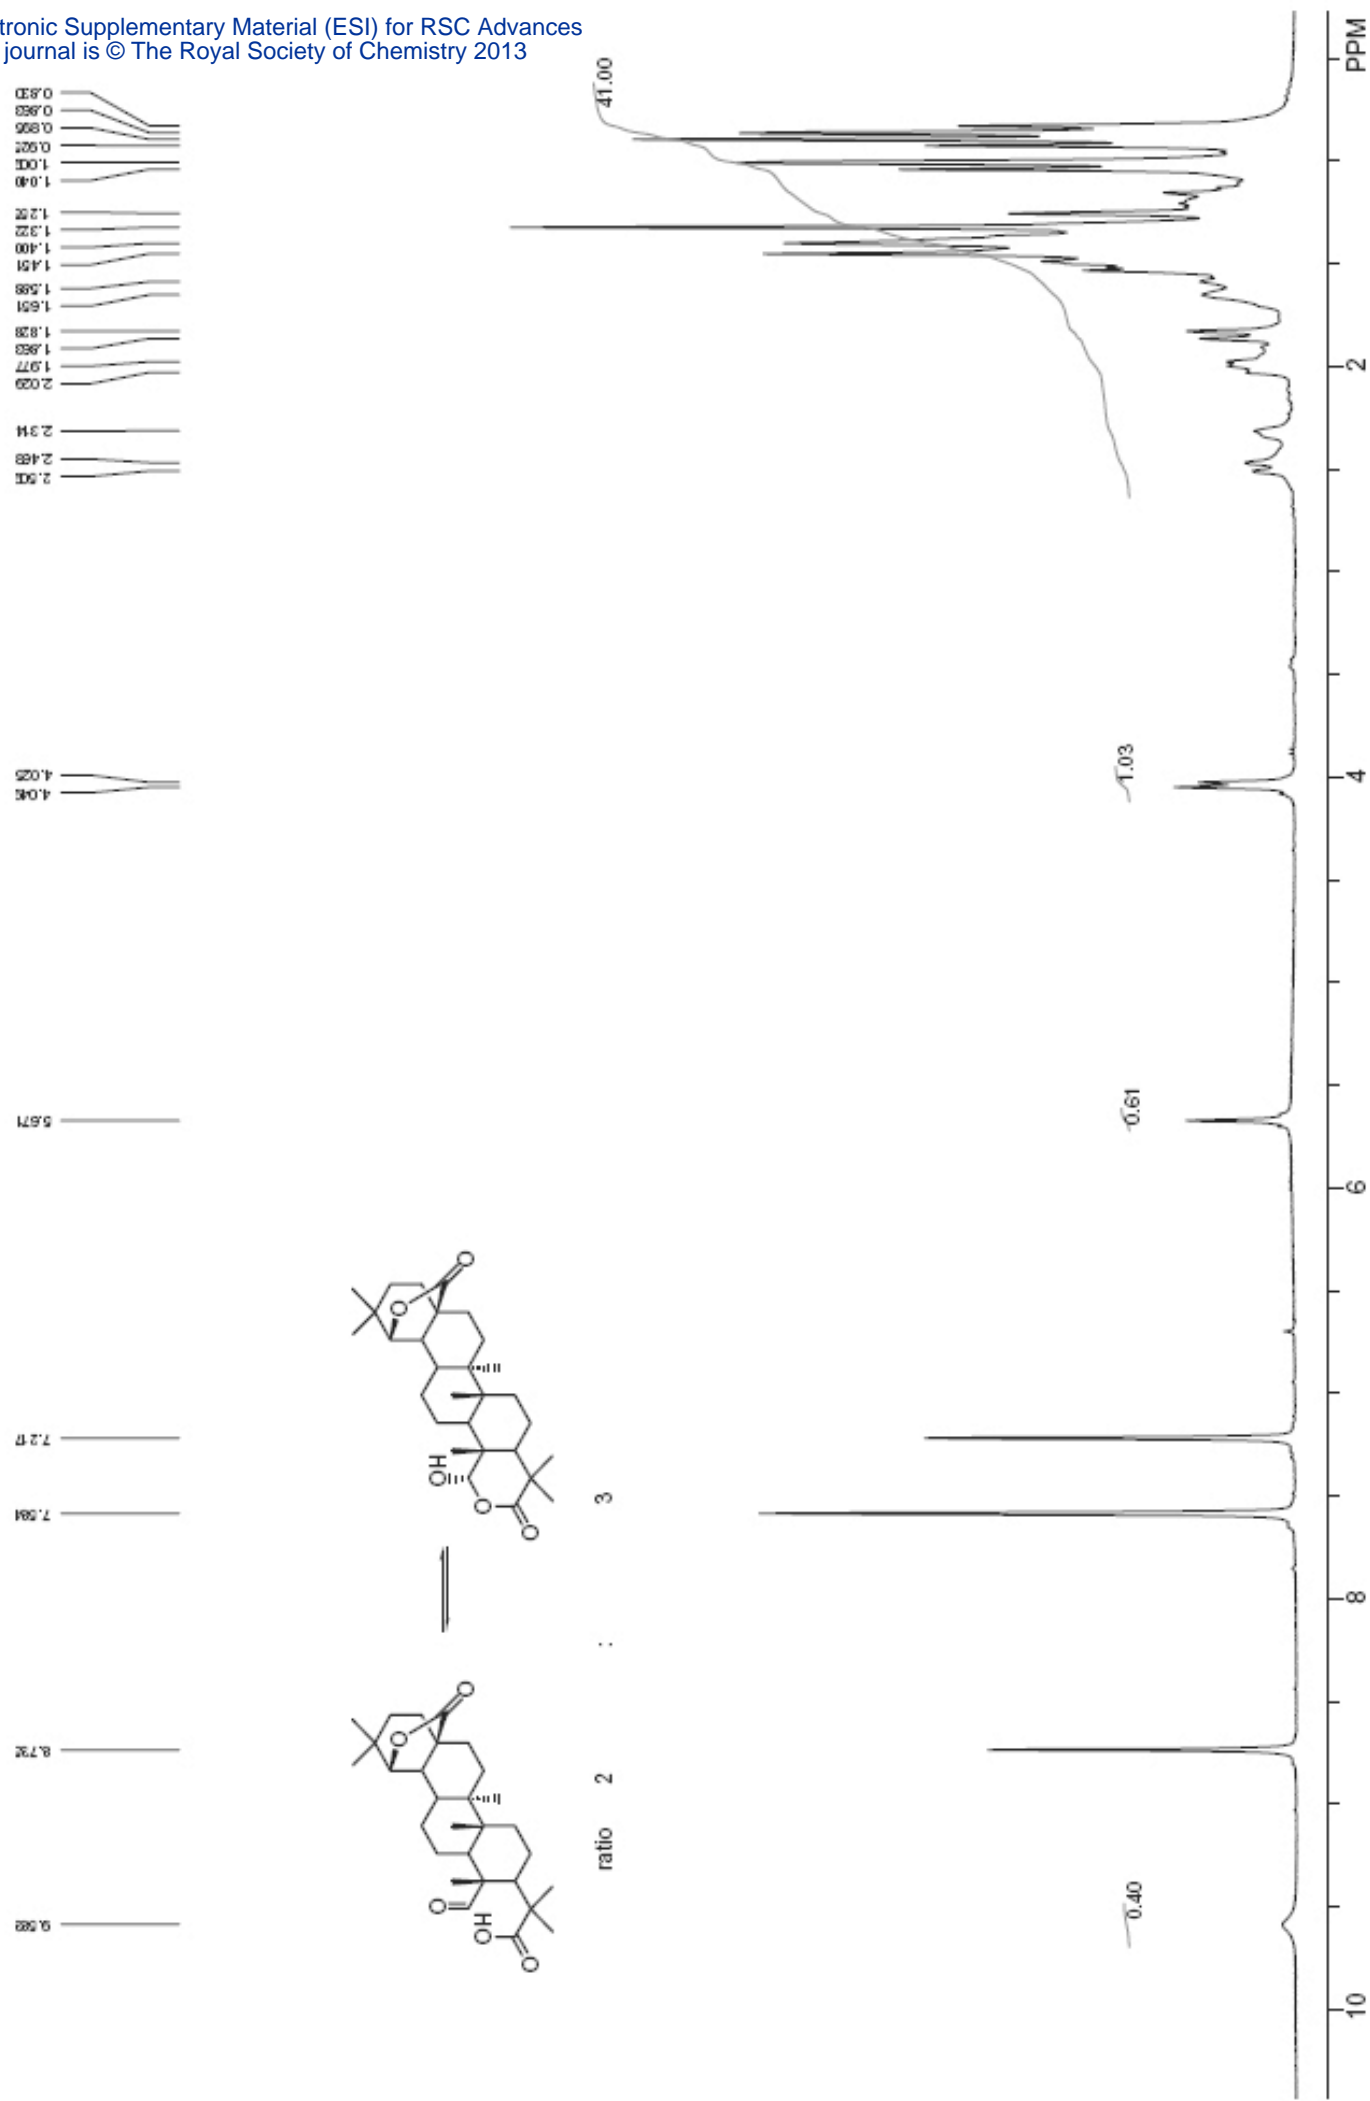

19 $\beta$ ,28-Epoxy-1,28-dioxo-1,3-seco-2-nor-18 $\alpha$ -oleanan-3-oic acid (**30**)/1-Hydroxy-2-oxa-3-oxo-2-nor-18 $\alpha$ -oleanan-28,19 $\beta$ -olide (**35**), Py-d<sub>6</sub>/tms

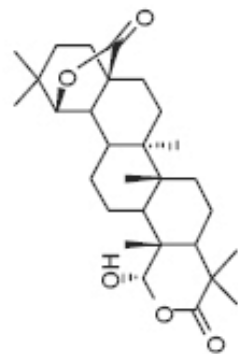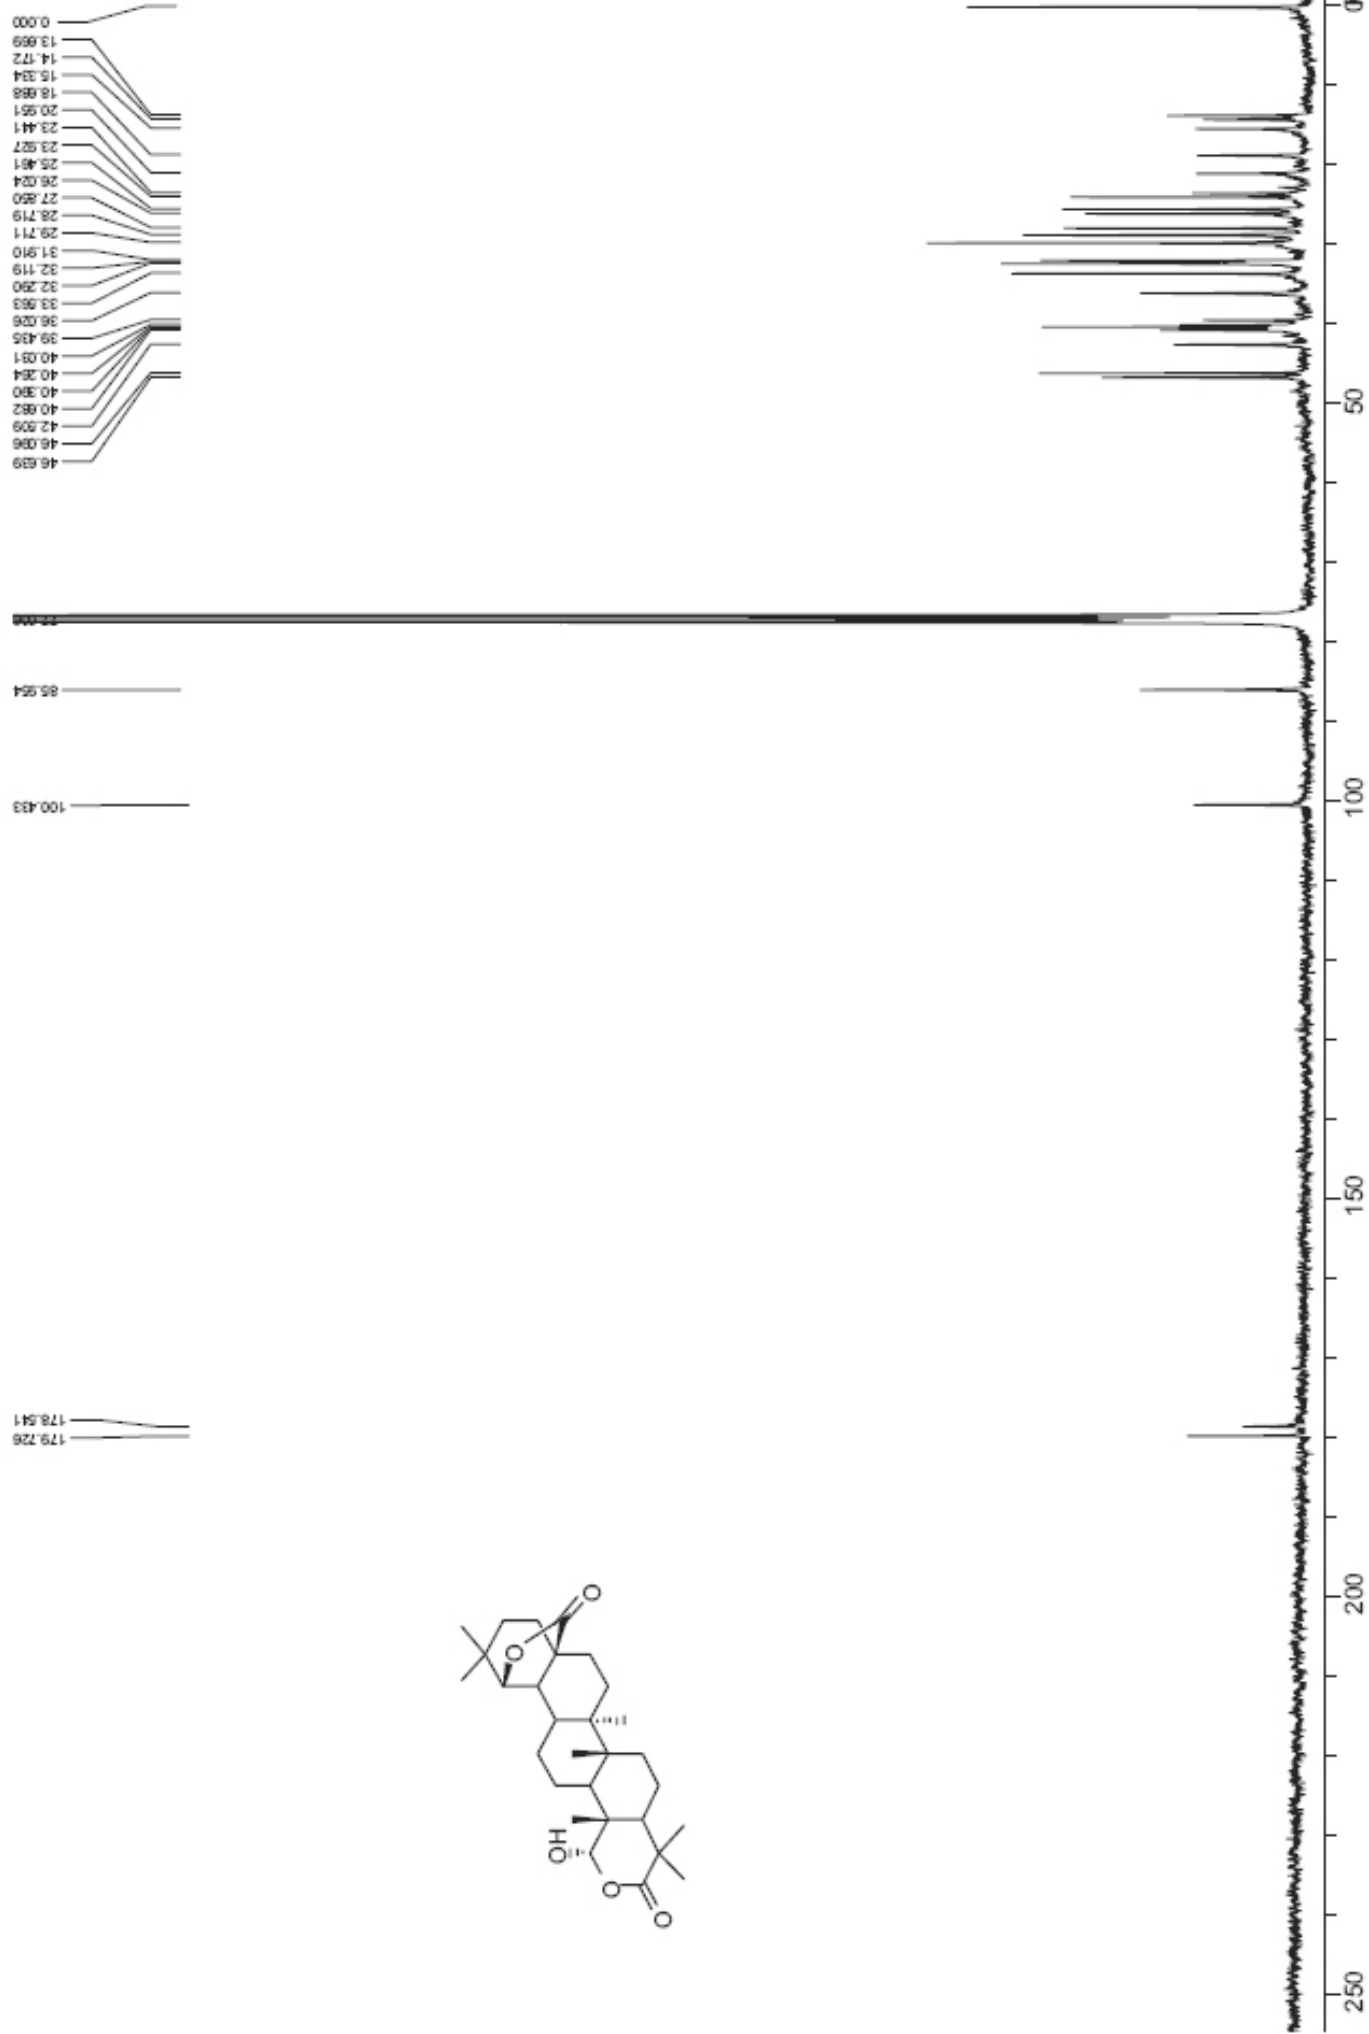

1-Hydroxy-2-oxa-3-oxo-2-nor-18α-oleanan-28,19β-olide (35), CDCl<sub>3</sub>/tms

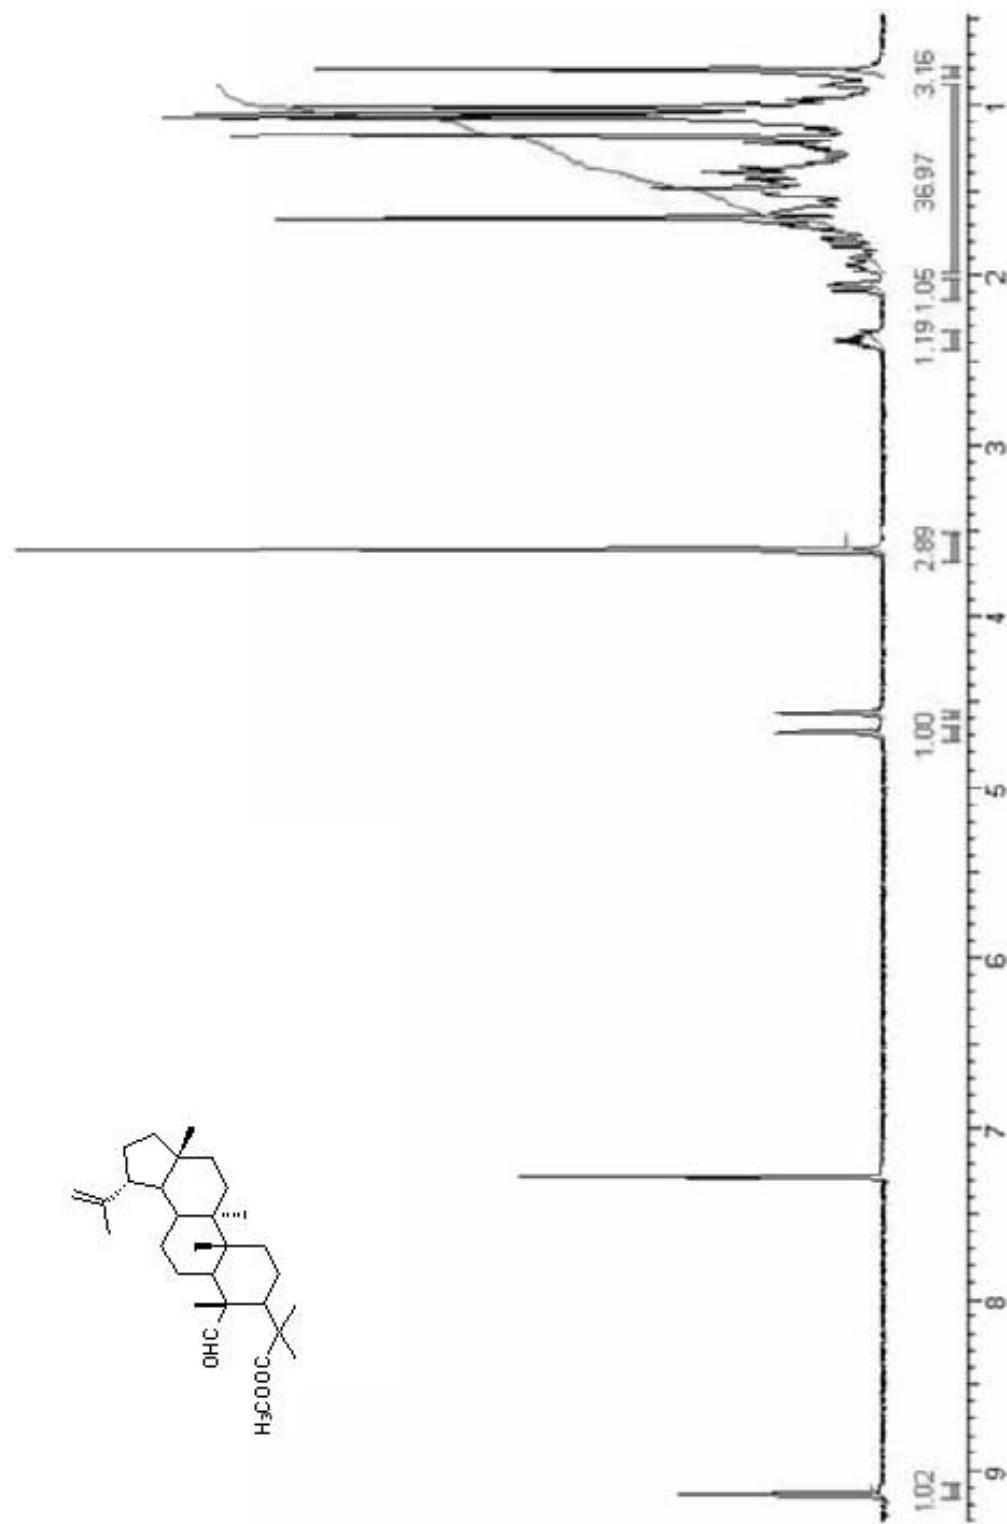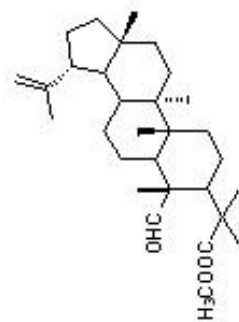

Methyl 1-oxo-2-nor-2,3-secolupan-3-oate (36), CDCl<sub>3</sub>/tms

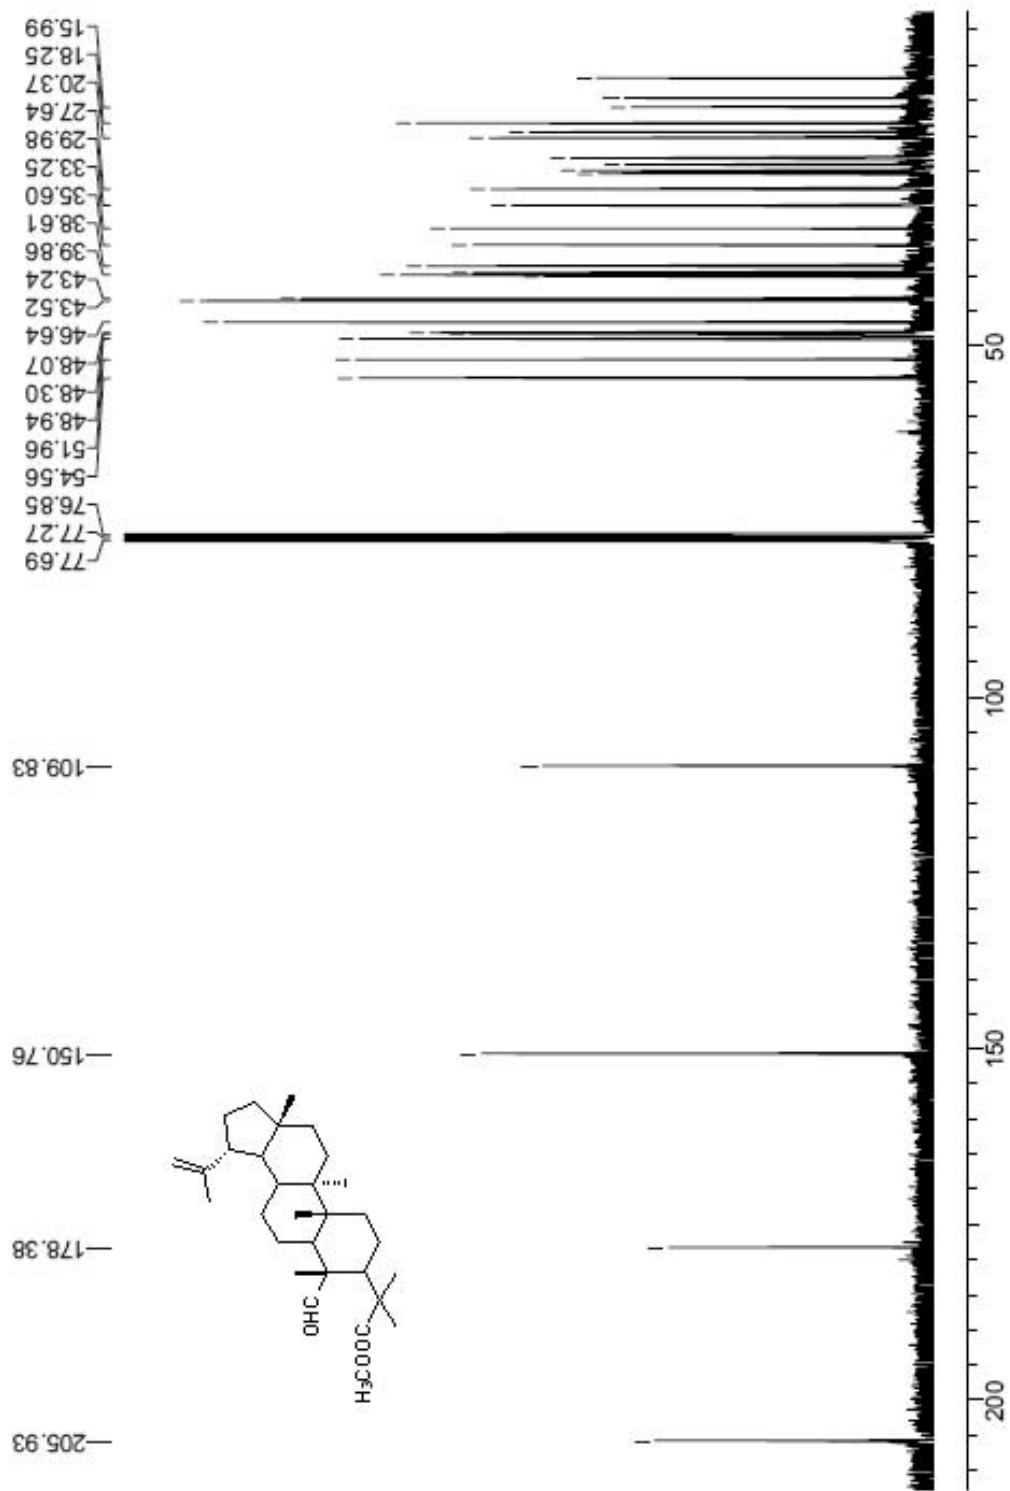

Methyl 1-oxo-2-nor-2,3-secolupan-3-oate (**36**), CDCl<sub>3</sub>/tms



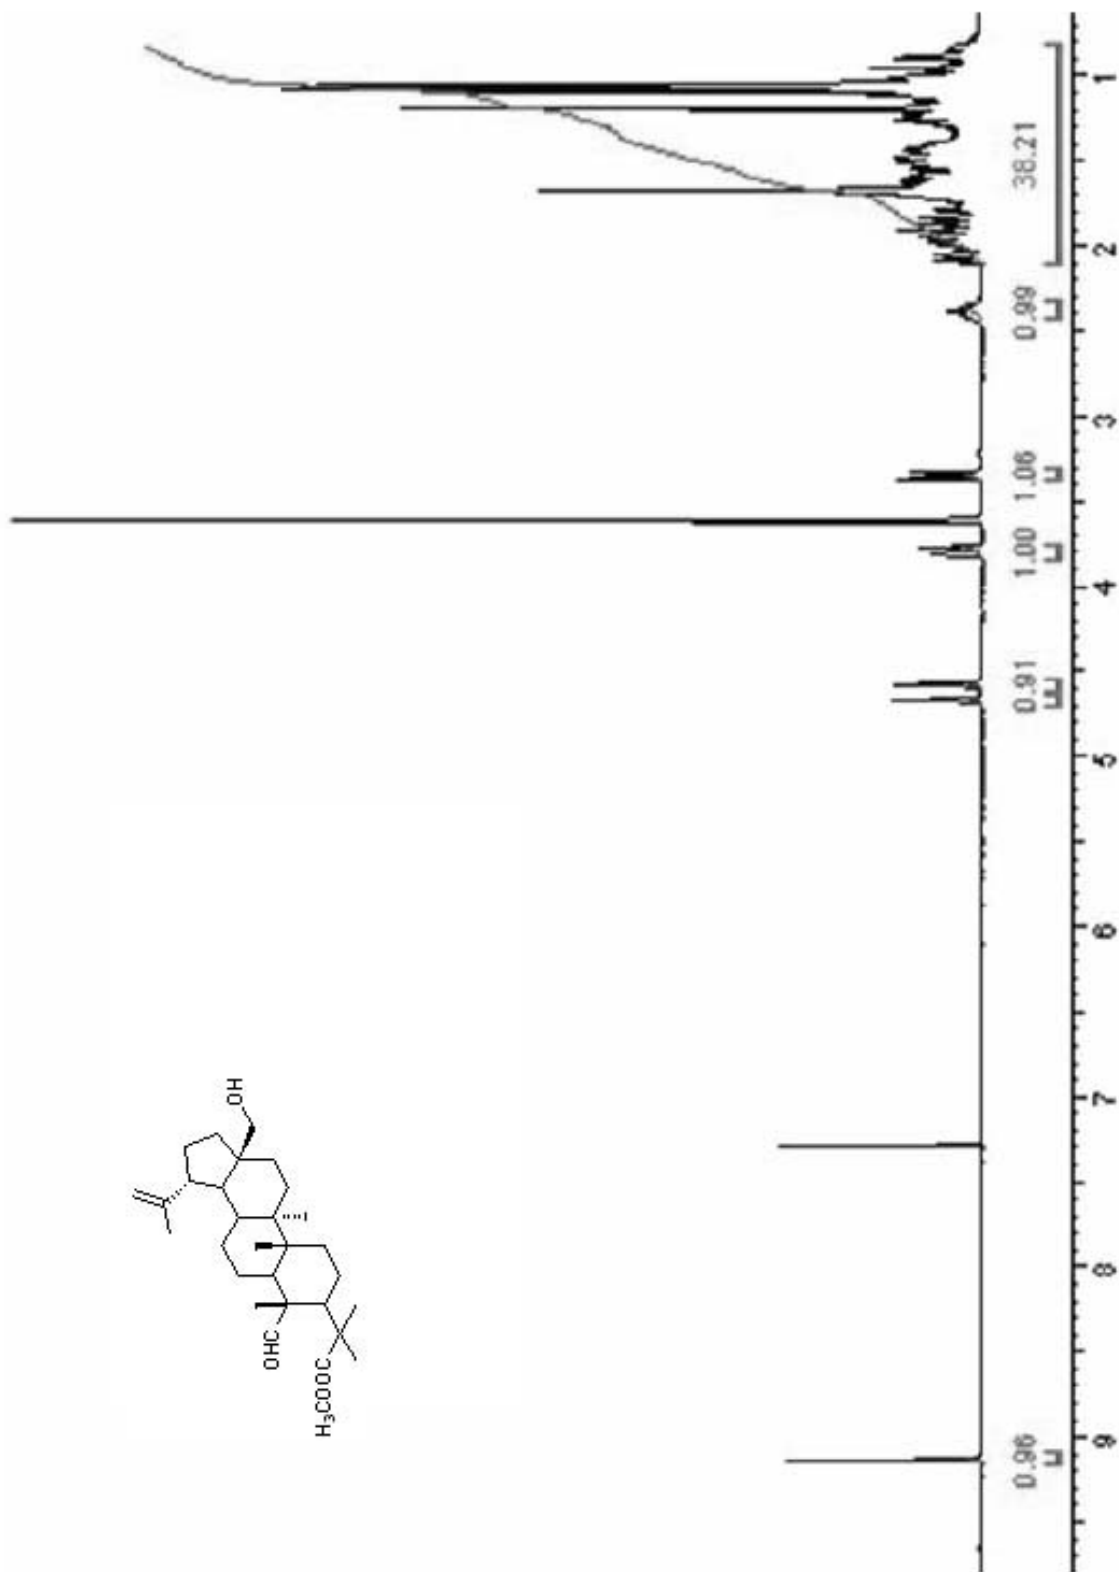

Methyl 1-oxo-28-hydroxy-1,3-seco-2-norlupan-3-oate (37), CDCl<sub>3</sub>/tms

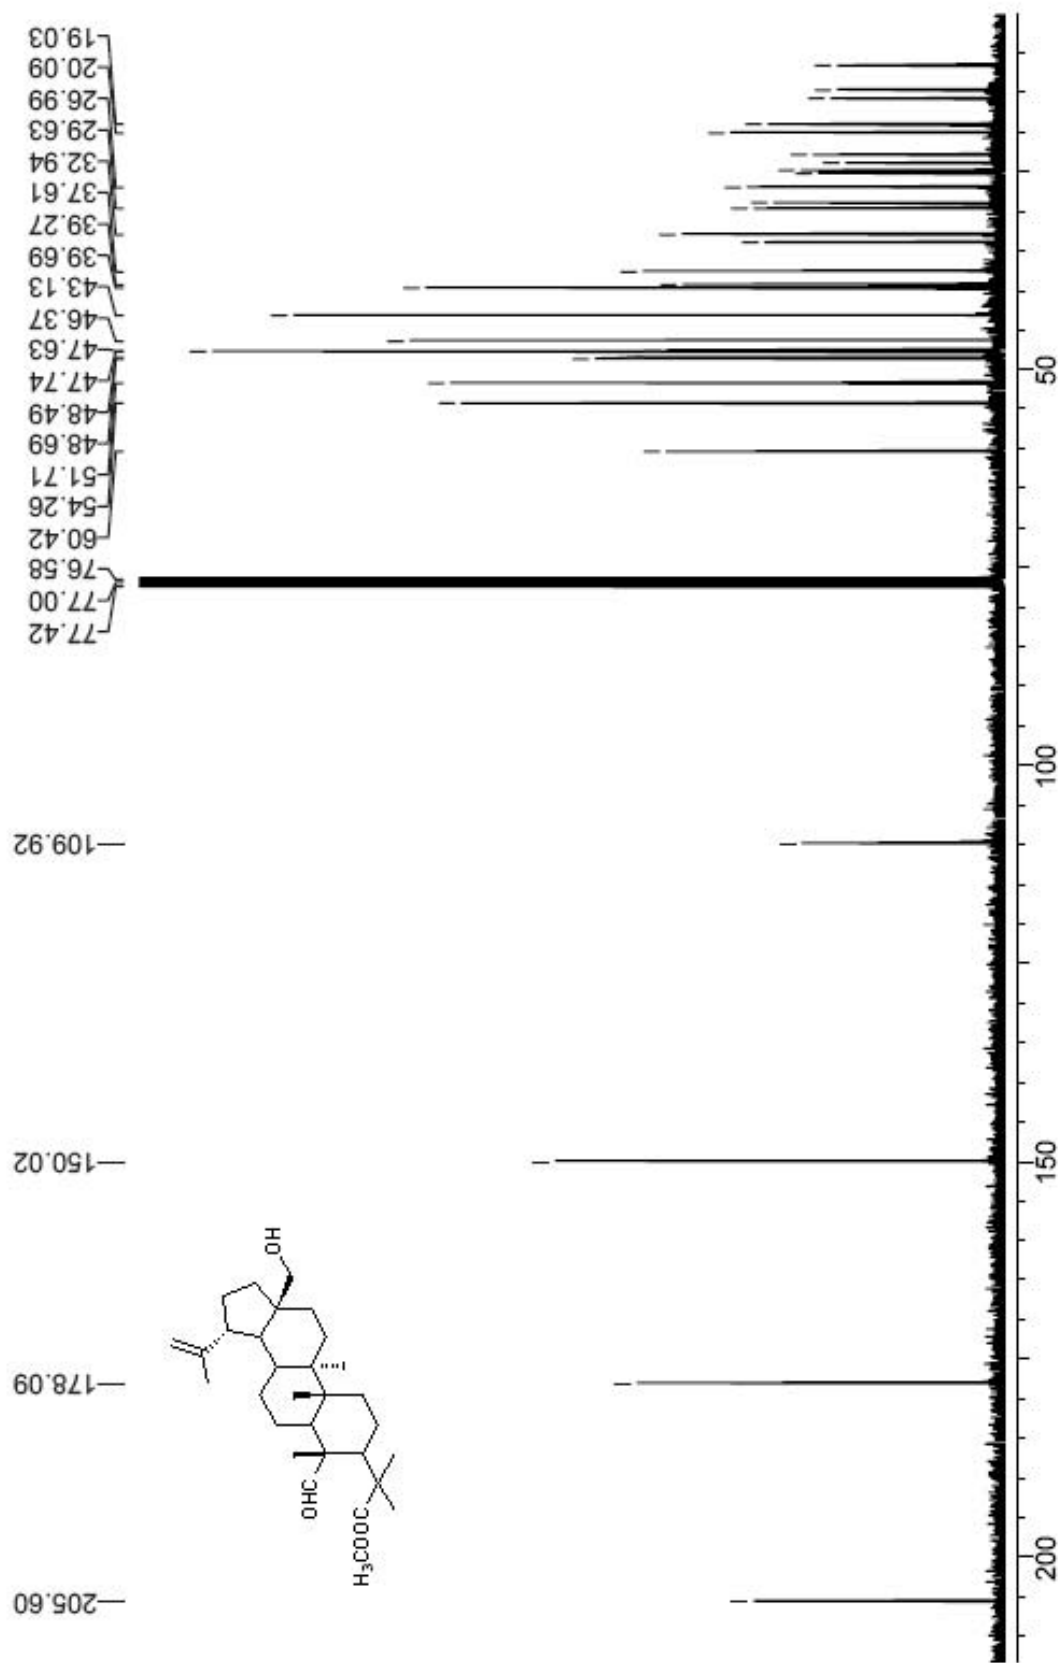

Methyl 1-oxo-28-hydroxy-1,3-seco-2-norlupan-3-oate (37), CDCl<sub>3</sub>/tms

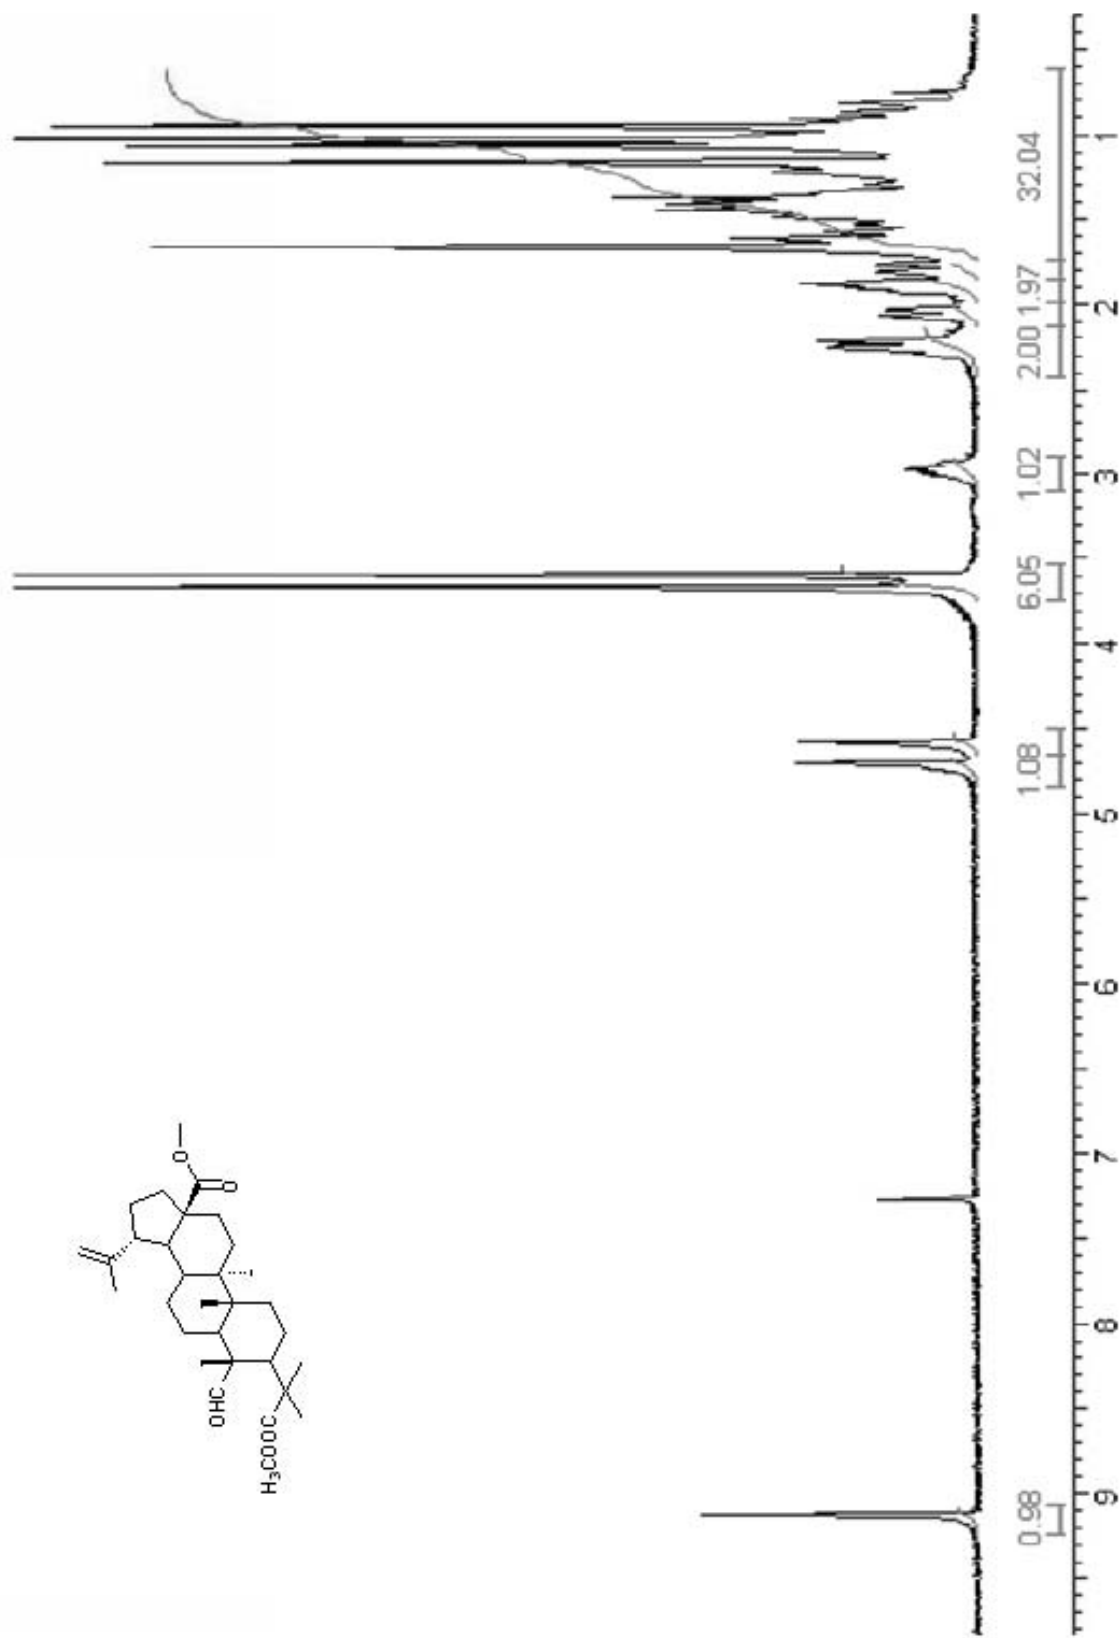

Dimethyl 1-oxo-1,3-seco-2-norlup-20-en-3,28-dioate (**38**),  $\text{CDCl}_3/\text{TMS}$

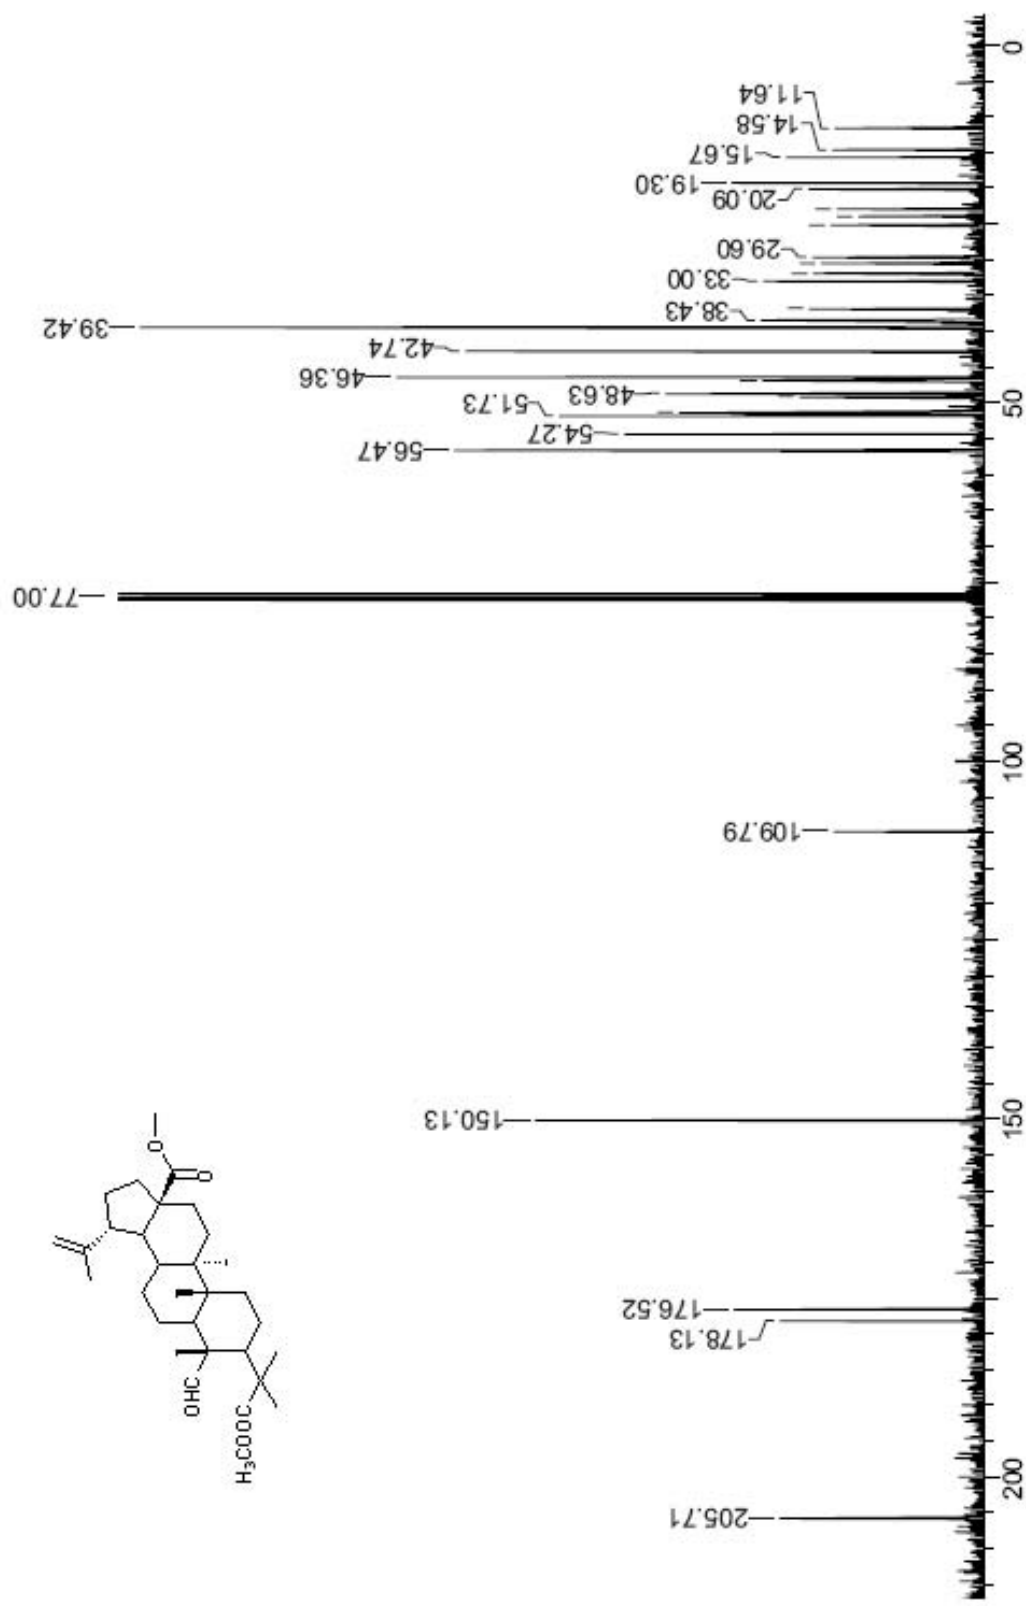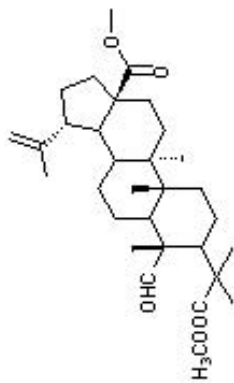

Dimethyl 1-oxo-1,3-seco-2-norlup-20-en-3,28-dioate (**38**),  $\text{CDCl}_3/\text{tms}$

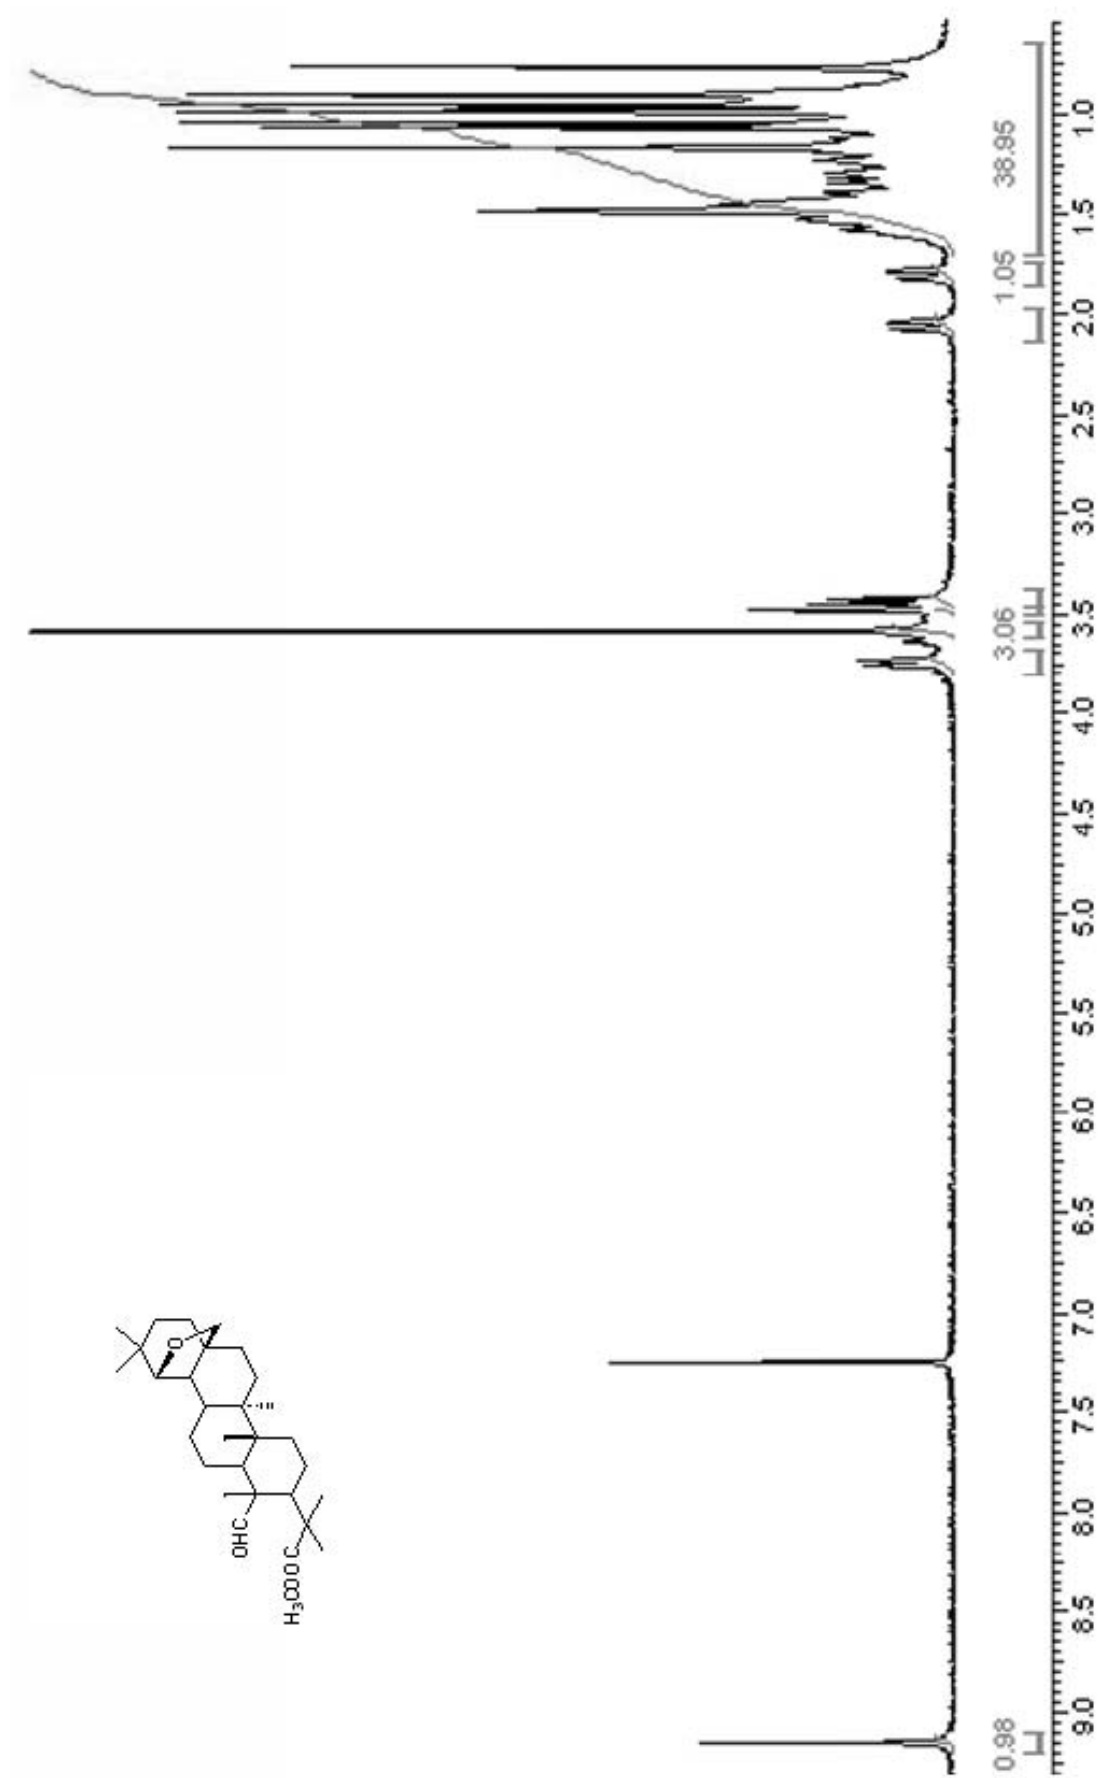

Methyl 1-oxo-19 $\beta$ ,28-epoxy-1,3-seco-2-nor-18 $\alpha$ -oleanan-3-oate (**39**), CDCl<sub>3</sub>/tms

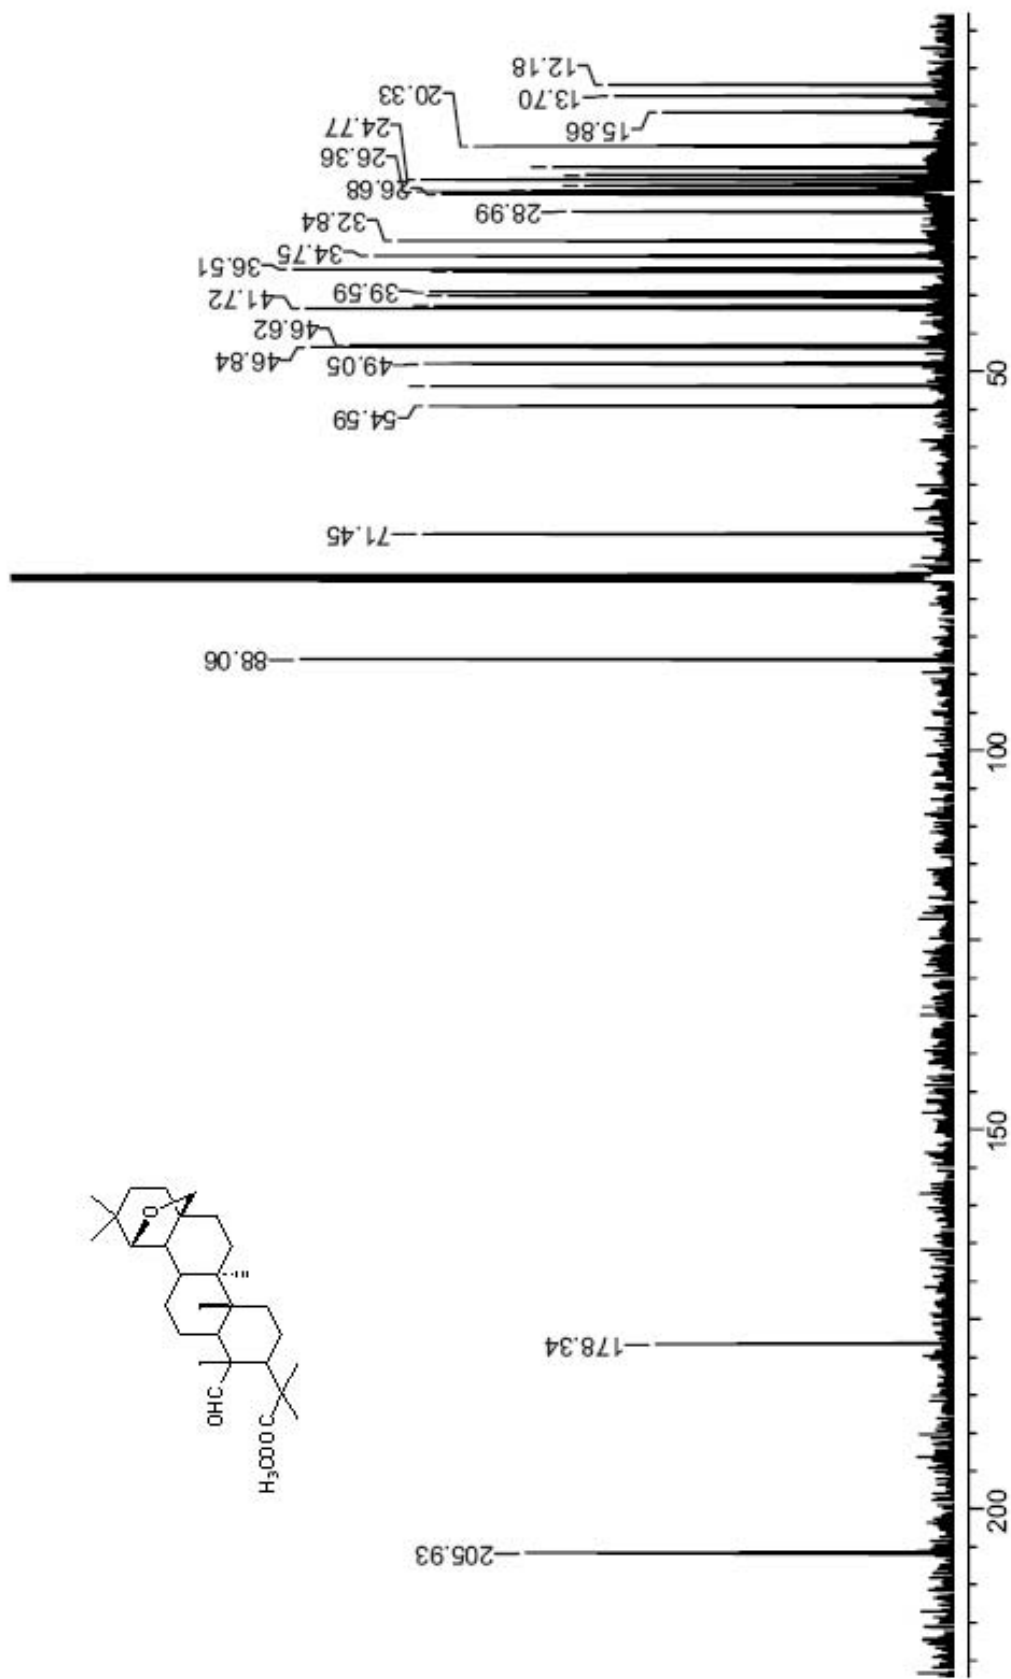

Methyl 1-oxo-19β,28-epoxy-1,3-seco-2-nor-18α-oleanan-3-oate (39), CDCl<sub>3</sub>/tms

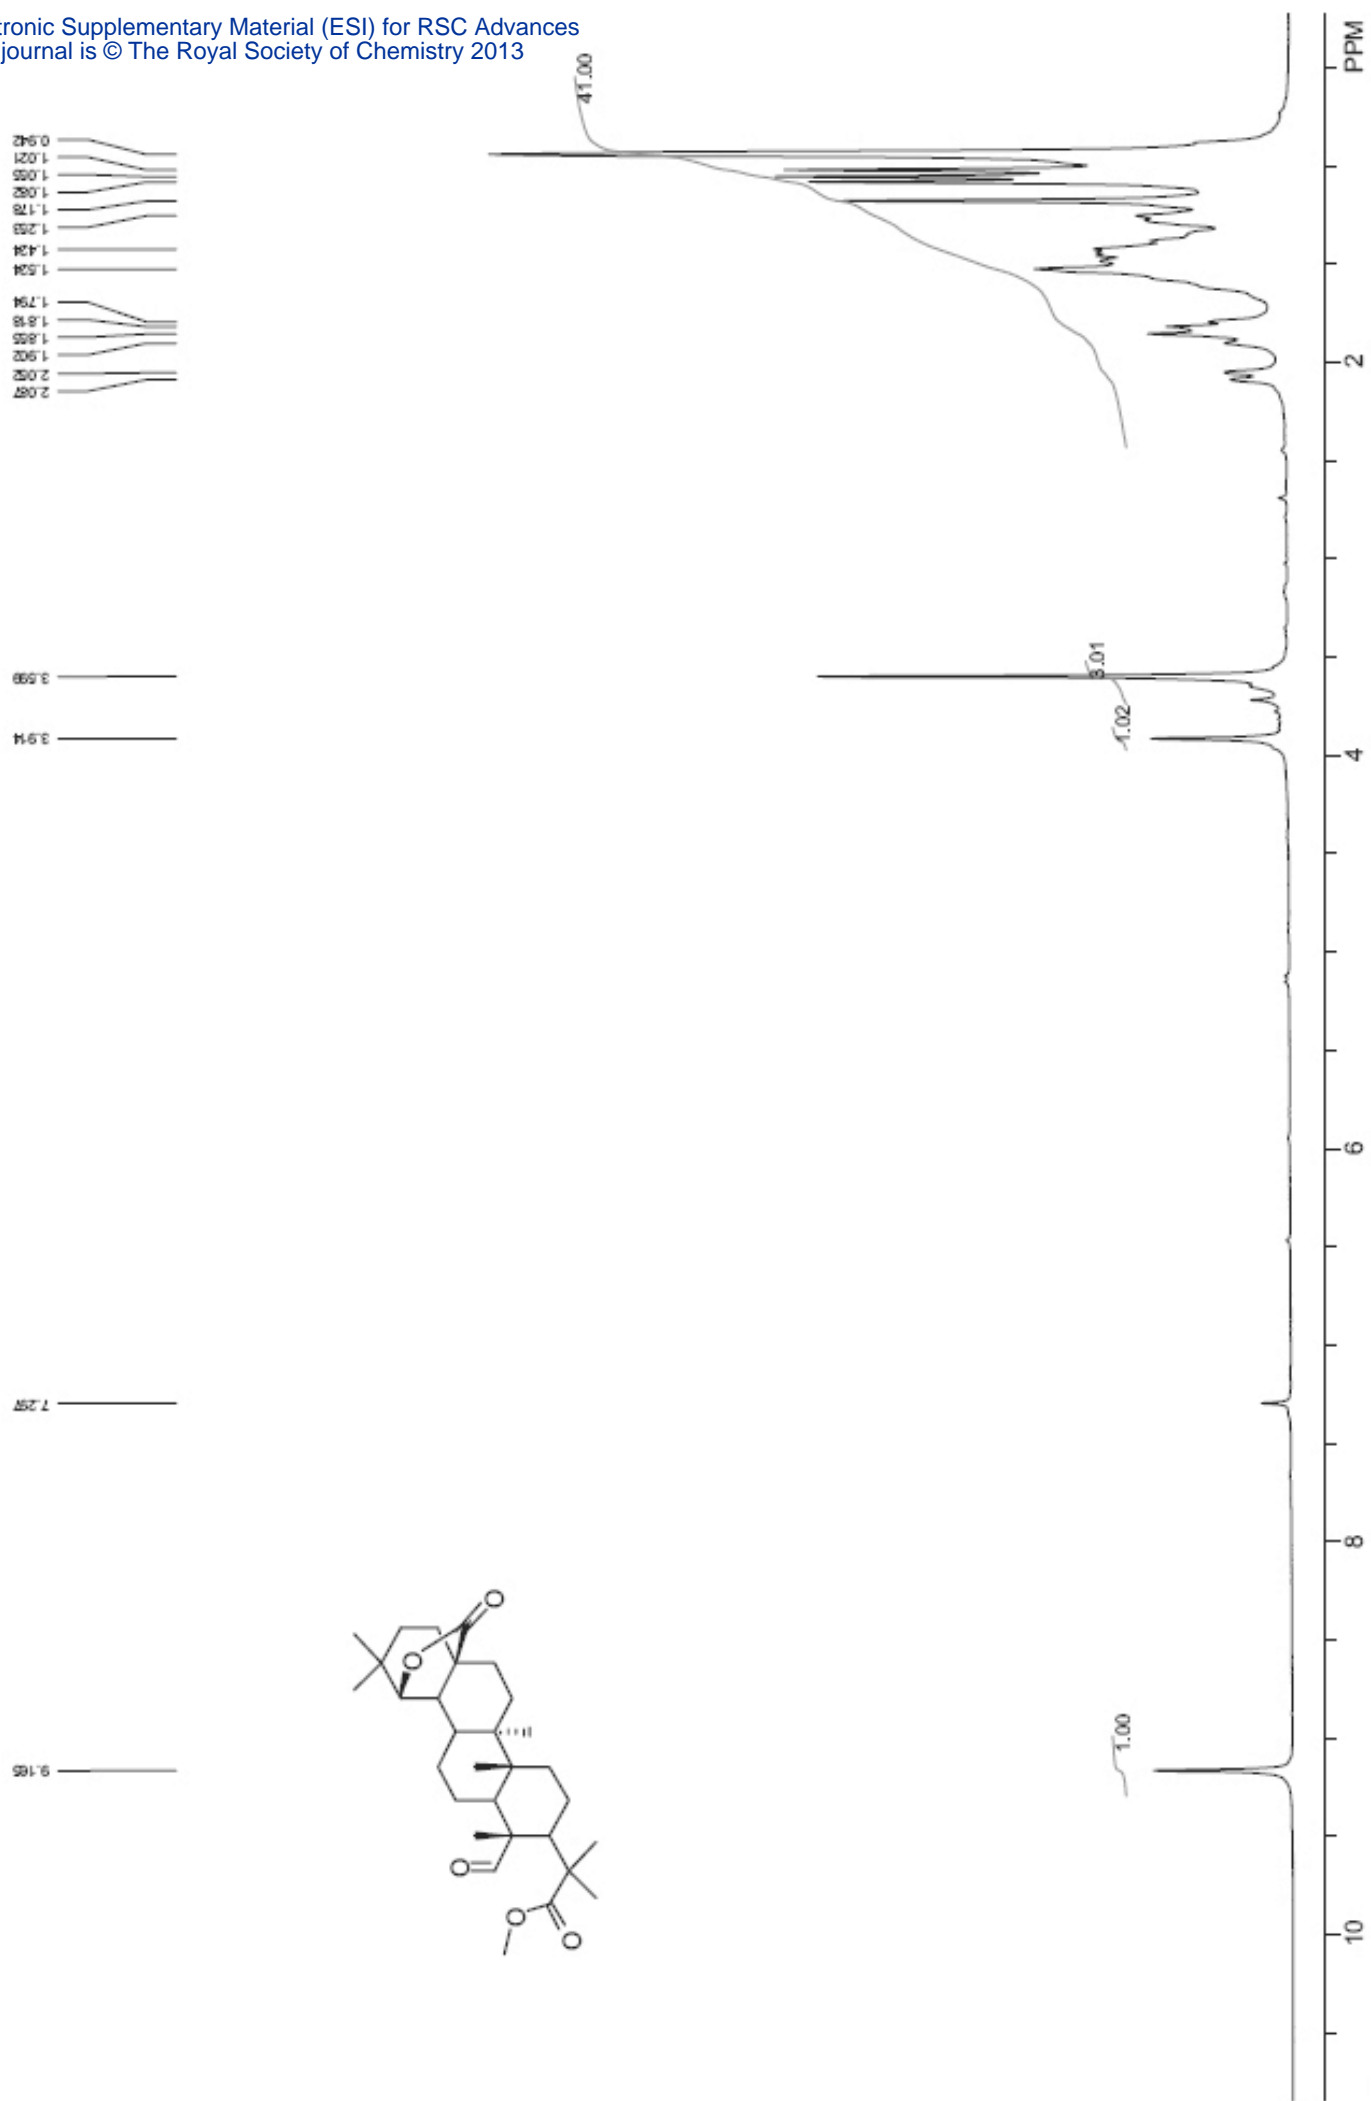

Methyl 19 $\beta$ ,28-epoxy-1,28-dioxo-1,3-seco-2-nor-18 $\alpha$ -oleanan-3-oate (**40**), CDCl<sub>3</sub>/tms

0.000  
11.954  
13.954  
15.434  
19.951  
22.731  
23.810  
23.901  
25.324  
25.383  
25.955  
27.850  
28.888  
31.854  
32.272  
32.383  
33.845  
36.325  
39.287  
39.952  
40.291  
46.108  
46.306  
46.471  
48.804  
51.716  
54.283

77.076

85.779

178.014

179.893

205.915

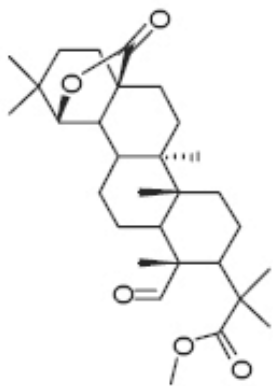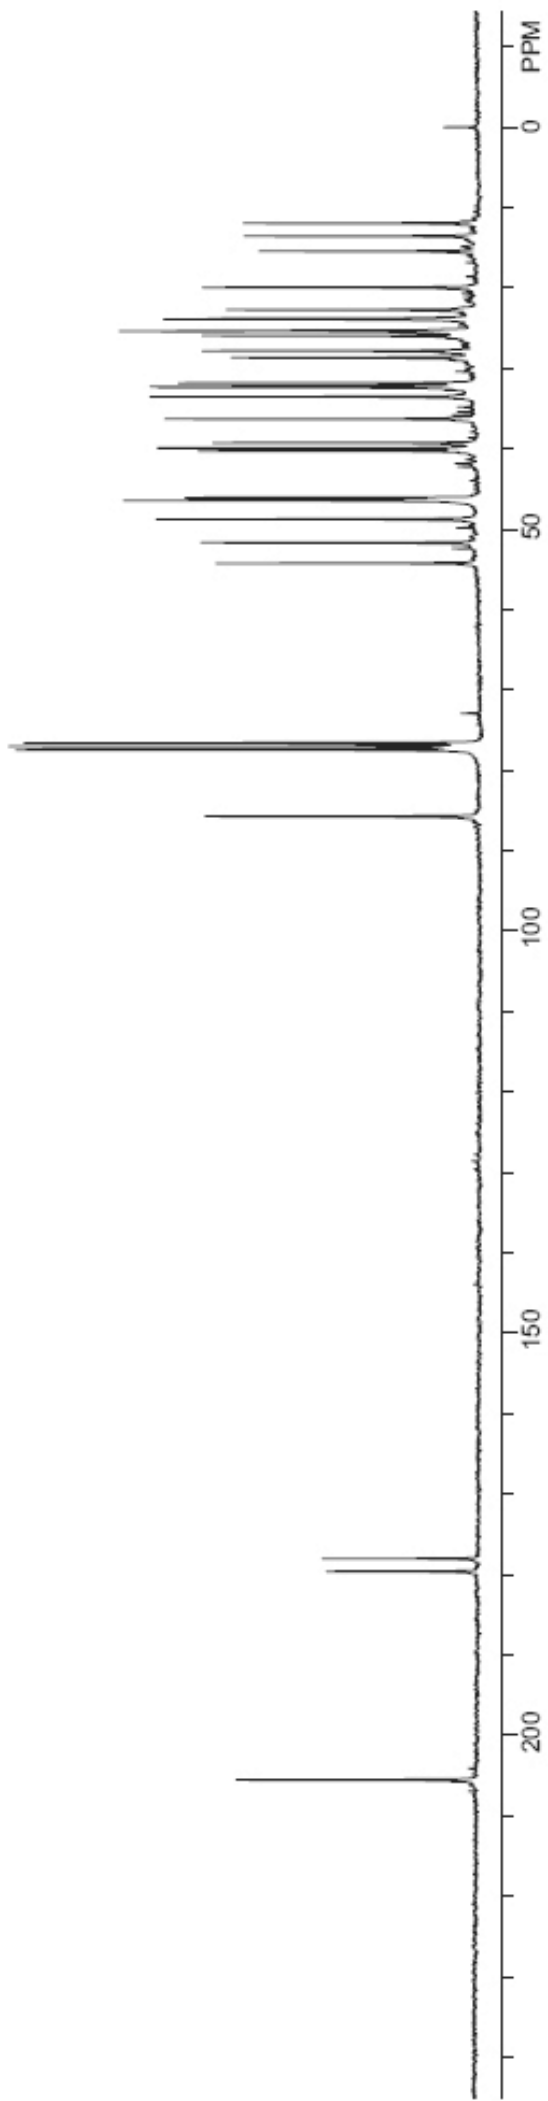

Methyl 19 $\beta$ ,28-epoxy-1,28-dioxo-1,3-seco-2-nor-18 $\alpha$ -oleanan-3-oate (**40**), CDCl<sub>3</sub>/tms



## 2. X-ray structural determination

Methyl 19 $\beta$ ,28-epoxy-3 $\beta$ -hydroxy-1(2 $\rightarrow$ 3)-abeo-18 $\alpha$ -oleanan-2-oate (**19**) crystals were obtained by slow evaporation of the chloroform solution at room temperature. X-ray intensity data were collected using a Rigaku AFC-7R diffractometer at room temperature with Mo K $\alpha$  radiation and a graphite monochromator. A total of 3252 reflections were collected ( $\theta = 2.5\text{--}27.5^\circ$ ); of these 3128 reflections were unique. The data were corrected for absorption using  $\psi$ -scan method. All raw data were processed using TeXsan 10.3b1 program.<sup>3</sup> The structures were solved by the direct method (Sir-92) and refined by full-matrix least-squares procedures on F<sup>2</sup> using the Crystals for Windows program.<sup>4</sup> The three-parameter Prince modified Chebychev polynomial weighting scheme incorporated in the program was used for the refinement. All non-hydrogen atoms were refined anisotropically, while the hydrogen atoms were found in calculated positions and refined using the riding model. The position of O–H hydrogen was found using difference Fourier map. CCDC reference number is 721850. The important crystallographic data for compound **19** (Figure 1) are presented in Table 1, while selected bond distances and angles are listed in Table 2.

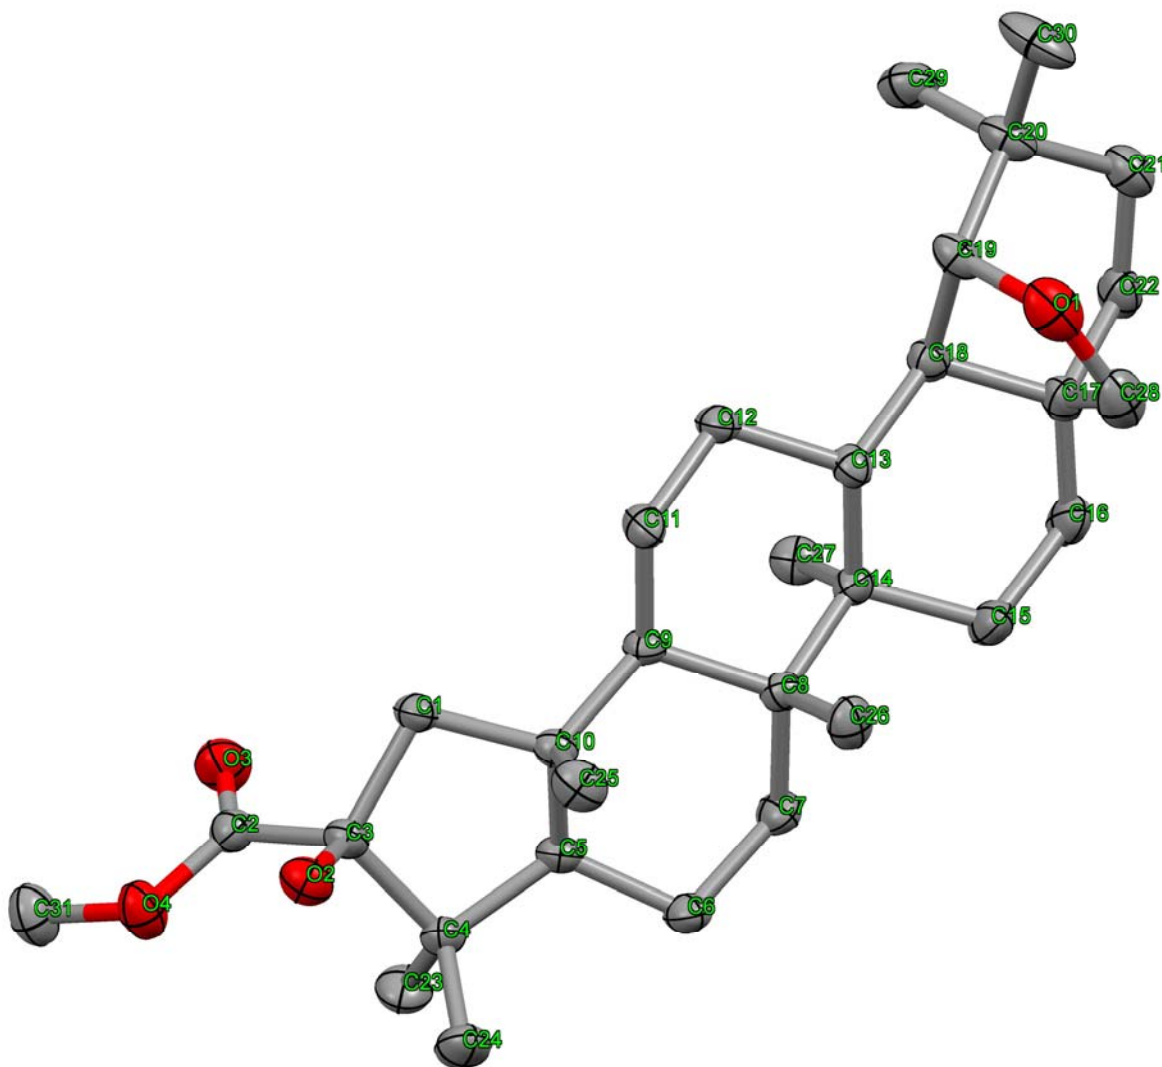

**Figure 1** X-ray structure of methyl 19 $\beta$ ,28-epoxy-3 $\beta$ -hydroxy-1(2 $\rightarrow$ 3)-abeo-18 $\alpha$ -oleanan-2-oate (**19**) (ellipsoids are at 30% probability, all hydrogen atoms are omitted for clarity)

<sup>3</sup> TeXsan 10.3.b. Rigaku Inc. 1998.

<sup>4</sup> P. W. Betteridge, J. R. Carruthers, R. I. Cooper, K. Prout and D. J. Watkin, *J. Appl. Cryst.*, 2003, **36**, 1487.

**Table 1** Crystallographic data for compound **19**

|                         |                                                |
|-------------------------|------------------------------------------------|
| Formula                 | C <sub>31</sub> H <sub>50</sub> O <sub>4</sub> |
| Crystal class           | Monoclinic                                     |
| Space group             | P2 <sub>1</sub>                                |
| Cell parameters:        |                                                |
| a, Å                    | 7.4870(15)                                     |
| b, Å                    | 16.276(3)                                      |
| c, Å                    | 11.153(2)                                      |
| β, °                    | 90.01(3)                                       |
| Volume Å <sup>3</sup>   | 1359.1(4)                                      |
| Z                       | 2                                              |
| Radiation type          | Mo K <sub>α</sub>                              |
| Crystal size (mm)       | 0.22x0.43x0.51                                 |
| Reflection measured     | 3262                                           |
| Independent reflections | 3252                                           |
| Reflection used         | 2542 (σ ≥ 3)                                   |
| 2θ range                | 5 – 55                                         |
| R <sub>f</sub>          | 0.0781                                         |
| R <sub>w</sub>          | 0.1633                                         |
| Number of parameters    | 317                                            |
| Goodness of fit         | 0.8988                                         |

**Table 2** Selected bond distances (Å) and angles (°) for compound **19**

|            |          |
|------------|----------|
| C28–O1     | 1.436(9) |
| C19–O1     | 1.450(7) |
| C3–O2      | 1.435(6) |
| C3–C2      | 1.538(8) |
| C2–O3      | 1.191(7) |
| C2–O4      | 1.341(7) |
| O4–C31     | 1.448(7) |
| O2–H–O1    | 2.442    |
| O2–H–O4    | 2.571    |
| C28–O1–C19 | 108.12   |
| O2–C3–C2   | 108.91   |
| C3–C2–O3   | 125.22   |
| C3–C2–O4   | 111.86   |
| C2–O4–C31  | 115.88   |

### 3. XYZ-coordinates of B3PW91/6-31G(d,p) optimized species

| MIN1                               | MIN2                               | MIN3                               |
|------------------------------------|------------------------------------|------------------------------------|
| HF=-657.6836693                    | HF=-657.6754739                    | HF=-657.675684                     |
| O -0.2812144 -0.3626100 -3.0889711 | O -0.3141655 0.9246525 -2.8330571  | O -0.7024420 -0.7389695 -2.9569879 |
| C -0.0297110 -0.2226834 -1.8928601 | C -0.1183285 0.2638980 -1.8345053  | C -0.3129600 -0.2432859 -1.9199292 |
| C 1.3951227 -0.2240895 -1.4965137  | C 1.2614083 -0.4078080 -1.6504253  | C 1.1965593 -0.0158461 -1.7190447  |
| C -1.1240777 -0.0179616 -0.8468433 | C -1.1827599 0.0285162 -0.7579249  | C -1.2326331 0.1739415 -0.7666608  |
| C -2.2510814 -1.0195389 -1.1698110 | C -1.9899968 -1.1934531 -1.2633176 | C -2.5848766 -0.5315357 -0.9459456 |
| C 1.7993188 0.0180093 -0.2363458   | H 1.9381692 -1.5359725 -0.0134992  | H 1.5725709 -1.6537400 -0.4279892  |
| H 2.8684118 0.0657676 -0.0306415   | C 1.8057340 -0.4687113 -0.2430382  | C 1.7246301 -0.5634227 -0.4219312  |
| H -0.3565164 -1.3917940 0.5544305  | H 2.8164442 -0.0394925 -0.2544204  | H 2.8002044 -0.3681128 -0.3548722  |
| C -0.5480749 -0.3058888 0.5696385  | H -0.4306922 -1.4291239 0.6407093  | H -0.6396361 -1.3442244 0.5954306  |
| C -1.5278886 -0.0730447 1.7278243  | C -0.5347767 -0.3313905 0.6285862  | C -0.5732416 -0.2426962 0.5943584  |
| C 0.8490189 0.2998999 0.8936835    | C -1.4489025 0.0161656 1.8145229   | C -1.3665946 0.2246680 1.8261110   |
| C 0.8741616 1.8280608 1.1421733    | C 0.9165569 0.1977079 0.8219054    | C 0.9527308 0.0447575 0.7734165    |
| C 1.3595313 -0.4181049 2.1702447   | C 1.0248414 1.7271187 0.6959411    | C 1.3314545 1.5356896 0.8807311    |
| C -1.6883562 1.4059369 -1.0460991  | C 1.4390190 -0.2537223 2.2056035   | C 1.4093258 -0.6855084 2.0583129   |
| O 2.2567281 -0.4411532 -2.5175736  | C -2.1170491 1.2487918 -0.7296983  | C -1.4574151 1.6968571 -0.9266131  |
| H 2.3561499 -0.0341838 2.4259870   | O 1.8454699 -0.8630176 -2.6104797  | O 1.8567967 0.5691863 -2.5521936   |
| H 1.4862075 -1.4856045 1.9416677   | H 2.4469707 0.1554822 2.3571287    | H 2.4855396 -0.5205865 2.1996111   |
| C 0.4115662 -0.2642760 3.3623818   | H 1.5513115 -1.3480643 2.1923563   | H 1.2760182 -1.7677212 1.9129153   |
| H -1.6904371 1.0002889 1.8892304   | C 0.5261024 0.1144819 3.3735365    | C 0.6350784 -0.2566271 3.3051109   |
| H -2.5080416 -0.4969992 1.4844357  | H -1.6097468 1.1003125 1.8613933   | H -1.2937628 1.3140606 1.9371763   |
| H 0.7957834 -0.8415959 4.2121660   | H -2.4375810 -0.4329570 1.6585897  | H -2.4300019 0.0009787 1.6924326   |
| C -1.0080605 -0.7211302 3.0168260  | H 0.9531391 -0.2681058 4.3083807   | H 0.9826233 -0.8336564 4.1706235   |
| H 0.3924047 0.7827579 3.6916864    | C -0.8736200 -0.4553663 3.1514429  | C -0.8681676 -0.4521138 3.1071112  |
| H -1.6890044 -0.5064436 3.8494332  | H 0.4677303 1.2053741 3.4867903    | H 0.8462841 0.7959268 3.5354281    |
| H -1.0122303 -1.8129701 2.8860518  | H -1.5446064 -0.1639810 3.9684418  | H -1.4221901 -0.0688286 3.9724621  |
| H 0.6810530 2.3934143 0.2287993    | H -0.8247191 -1.5541307 3.1637870  | H -1.0871528 -1.5282608 3.0494166  |
| H 0.1490339 2.1446358 1.8969818    | H 0.7811105 2.0873171 -0.3093875   | H 1.3029620 2.0478160 -0.0841168   |
| H 1.8683695 2.1224019 1.4976422    | H 0.3655152 2.2485360 1.3956137    | H 0.6862297 2.0883145 1.5677627    |
| H -2.4682391 1.6091876 -0.3055371  | H 2.0513492 2.0473314 0.9089637    | H 2.3590521 1.6246981 1.2515902    |
| H -0.9270863 2.1836212 -0.9600674  | H -3.0066147 1.0452552 -0.1278369  | H -2.0802850 2.0737469 -0.1098847  |
| H -2.1347947 1.4848299 -2.0416461  | H -1.6239983 2.1370384 -0.3250920  | H -0.5318049 2.2750511 -0.9394546  |
| H -3.1334684 -0.8258063 -0.5534618 | H -2.4370927 1.4843104 -1.7471600  | H -1.9832711 1.8924867 -1.8663781  |
| H -2.5407688 -0.9276849 -2.2192235 | H -2.7490281 -1.4679159 -0.5226784 | H -3.3317502 -0.1314713 -0.2547915 |
| H -1.9308496 -2.0526321 -0.9954754 | H -2.4959011 -0.9601798 -2.2049338 | H -2.9522916 -0.3865856 -1.9645300 |
| H 1.6931023 -0.5334174 -3.3098180  | H -1.3497866 -2.0677177 -1.4268330 | H -2.4989872 -1.6102837 -0.7785264 |

| MIN4                               | MIN5                               | MIN6                               |
|------------------------------------|------------------------------------|------------------------------------|
| HF=-733.5270935                    | HF=-733.5233772                    | HF=-733.575113                     |
| O -0.2562403 -1.7417589 -1.7799954 | O -0.3756648 -0.3543956 -3.0655740 | O 0.0029249 -1.9924287 2.3728712   |
| O -0.2900219 0.2056169 -3.0984384  | O 0.5277516 1.4236582 -1.8572570   | O -0.4923885 -0.1883750 3.6565519  |
| C -0.0840755 -0.4228540 -1.8052398 | C 0.0828524 0.1637085 -1.7951261   | C -0.2931669 -0.7946731 2.5615508  |
| C 1.4066610 -0.3526120 -1.4577238  | C 1.4076152 -0.4865564 -1.4219378  | C -0.4706054 0.1356150 1.2993371   |
| C -1.0013774 0.3763585 -0.8061459  | C -1.0943451 -0.0944817 -0.7741282 | C 0.9070212 0.4641598 0.5411190    |
| C -2.4464347 -0.0527302 -1.1138347 | C -1.8966015 -1.3486958 -1.1690739 | C 2.1234534 -0.2621671 1.1393127   |
| H 1.5443664 -1.8251415 0.0376299   | H 2.2125646 -1.3101398 0.3253189   | H -1.1939478 -1.6327325 0.3055398  |
| C 1.7426074 -0.7499370 -0.0312453  | C 1.8845534 -0.3069614 0.0134762   | C -1.3617523 -0.5509395 0.2366865  |
| H 2.8139458 -0.5818531 0.1413887   | H 2.7900099 0.3138762 -0.0020982   | H -2.4176344 -0.3455513 0.4477608  |
| H -0.8233670 -1.1740918 0.5984365  | H -0.3672666 -1.4514338 0.7091829  | H 0.8712760 -1.1451320 -0.8327371  |
| C -0.6182417 -0.0923217 0.6333825  | C -0.5368262 -0.3598020 0.6732969  | C 0.6403416 -0.0677327 -0.8928314  |
| C -1.4990504 0.4987800 1.7473578   | C 0.8586396 0.2344036 1.0325435    | C 1.4374224 0.4556078 -2.0838423   |
| C 0.8960472 -0.0027786 1.0177745   | H -1.2345849 -2.2126427 -1.2992594 | C -0.8883473 -0.0309276 -1.1263208 |
| C 1.4446662 1.4334605 1.1415548    | H -2.4179350 -1.1946999 -2.1169825 | C -1.4808217 1.3704763 -1.3727394  |
| C 1.0793539 -0.7199171 2.3764984   | C 0.8943068 1.7725601 1.0617769    | C -1.1923488 -0.9395326 -2.3288621 |
| C -0.8942675 1.8940640 -1.0300762  | C 1.2600891 -0.3128704 2.4262353   | C 1.2210562 1.9670909 0.5782050    |
| O 2.2884476 -0.1884254 -2.3032494  | C -2.0252150 1.1242977 -0.8580318  | O -1.0810537 1.3268366 1.7741409   |
| O 0.4593990 -0.1115396 -3.6220049  | O 2.1582495 -1.0057567 -2.2510787  | H -1.0272375 1.1544741 2.7528362   |
| H 2.1426056 -0.6899287 2.6578042   | C -1.5694362 -0.0658740 1.7754055  | H -2.2709062 -0.9521156 -2.5442536 |
| H 0.8224048 -1.7810578 2.2425573   | H -2.6412307 -1.5999724 -0.3990529 | H -0.9099576 -1.9714762 -2.0723627 |
| C 0.2136680 -0.1462803 3.4985415   | H -2.9417291 0.9731294 -0.2734577  | C -0.4137112 -0.4975115 -3.5792091 |
| H -1.3215261 1.5791139 1.8516694   | H -1.5246683 2.0363338 -0.5251277  | H 1.2121203 1.5134745 -2.2742903   |
| H -2.5550193 0.3919268 1.4759646   | H -2.3066910 1.2804184 -1.9043512  | H 2.5167361 0.3999472 -1.8853544   |
| H 0.3743077 -0.7134747 4.4265128   | H 0.4100864 -0.2694159 -3.6232540  | H -0.5978047 -1.2004981 -4.4039383 |
| C -1.2624228 -0.1789695 3.1011491  | H -1.7517114 1.0148996 1.8365568   | C 1.0976972 -0.3891056 -3.3242634  |
| O 0.5149766 0.8887918 3.7143884    | H -2.5324008 -0.5206435 1.5106122  | H -0.7938980 0.4754679 -3.9202093  |
| H -1.8816285 0.2914112 3.8787132   | C -1.1279530 -0.5783053 3.1484251  | H 1.5980525 0.0136039 -4.2164529   |
| H -1.5877878 -1.2280968 3.0330513  | H 0.1295953 2.1967699 1.7230410    | H 1.5015291 -1.4013576 -3.1718721  |
| H 1.6111517 1.8856734 0.1616228    | H 1.8726689 2.1092331 1.4342094    | H -1.4589396 1.9697924 -0.4604513  |
| H 0.7851378 2.1011148 1.7052083    | H 0.7525536 2.1469781 0.0417354    | H -0.9718444 1.9255590 -2.1689337  |
| H 2.4150822 1.4133633 1.6562653    | H 1.3843198 -1.4048165 2.3520947   | H -2.5346214 1.2685565 -1.6661093  |
| H -1.3568305 2.4636979 -0.2116065  | H 2.2466649 0.0926603 2.6945716    | H 2.1757790 2.1585023 0.0691171    |
| H 0.1400564 2.2305642 -1.1376373   | H -1.8764752 -0.3199673 3.9113308  | H 0.4513881 2.5840992 0.1113346    |
| H -1.4030613 2.1599783 -1.9607303  | H -1.0746966 -1.6779093 3.1221770  | H 1.3140045 2.3035873 1.6151061    |
| H -3.1810333 0.5220726 -0.5343636  | C 0.2450079 -0.0243481 3.5322253   | H 3.0159664 -0.0735836 0.5249333   |
| H -2.6474735 0.1123547 -2.1769272  | H 0.5859895 -0.4635489 4.4807734   | H 2.3331559 0.0993622 2.1527042    |
| H -2.5763223 -1.1215751 -0.9177173 | H 0.1699408 1.0585271 3.7017787    | H 1.9502156 -1.3387184 1.2084774   |

| MIN7                               | TS1                                | TS2                                |
|------------------------------------|------------------------------------|------------------------------------|
| HF=-733.5737809                    | HF=-733.5100102                    | HF=-733.5069776                    |
| O -3.5749124 0.6236811 0.0238832   | O 0.3763304 -1.6982908 1.9666763   | O -3.2971068 0.3431835 0.0875800   |
| O -2.0080620 1.9244840 1.0160324   | O -0.0718029 0.1294556 3.2712289   | O -2.0690763 -0.8275590 -1.4361975 |
| C -2.3901399 0.9951590 0.2732828   | C -0.1692300 -0.5666003 2.0526891  | C -2.1033400 -0.3105657 -0.2819624 |
| C -1.3007431 0.1431232 -0.4837660  | C -1.3860213 -0.1611427 1.3164031  | C -1.4314490 -0.8830577 0.9061728  |
| C -0.5189808 -0.8681139 0.4889435  | C 0.7647071 0.6834735 0.7235103    | C -0.7203426 1.1319899 -0.1218940  |
| C -0.9590776 -2.3154017 0.2307747  | C 2.1568798 0.4141592 1.2682993    | C -1.1909720 2.1537001 0.8974771   |
| H -0.0916009 0.6472803 -2.1804373  | H -1.2493782 -1.8852943 0.0900833  | H 0.1784934 -2.0026960 1.6626443   |
| C -0.2021025 1.0181780 -1.1531830  | C -1.6206878 -0.8580793 -0.0043146 | C -0.1596369 -1.6734193 0.6733175  |
| H -0.5031292 2.0700703 -1.1984712  | H -2.6987001 -0.8712589 -0.2072646 | H -0.4162339 -2.5617046 0.0808876  |
| H 1.0236734 -1.2233240 -0.9086284  | H 0.9660923 -0.9772167 -0.5181137  | H 0.7366137 0.6882997 1.3554037    |
| C 0.9501357 -0.6677277 0.0435919   | C 0.5962408 0.0516687 -0.6654345   | C 0.6927502 0.6294643 0.2530733    |
| C 1.1083096 0.8130018 -0.3762206   | C 1.4668743 0.6635204 -1.7812783   | C 0.9651275 -0.8722102 -0.0464199  |
| H -0.8396503 -2.5931584 -0.8194502 | C -0.8676738 -0.1441885 -1.1516990 | H -1.3003910 1.7020504 1.8935730   |
| H -2.0161891 -2.4499443 0.4848749  | C -1.6199969 1.1558602 -1.4988138  | H -2.1584539 2.5770641 0.6059903   |
| C 1.1811018 1.8262588 0.7842194    | C -0.8317741 -1.0546042 -2.3993571 | C 0.9745000 -1.2220958 -1.5456973  |
| C 2.3891183 0.9084461 -1.2236650   | C 0.4105957 2.1486229 0.8880100    | C 2.3290139 -1.2466529 0.5794230   |
| C -0.7346233 -0.6003089 1.9884213  | O -2.1410828 0.7460620 1.7342626   | C -0.8580294 1.6815023 -1.5299413  |
| O -1.9983435 -0.5614622 -1.5001023 | H -0.8025164 0.7737519 3.2245531   | O -1.8542825 -0.6783037 2.0632258  |
| C 2.1084438 -1.1697547 0.9006515   | H -1.8575526 -1.2340143 -2.7546946 | C 1.8415371 1.5235471 -0.2508055   |
| H -0.3709527 -3.0042217 0.8537973  | H -0.4260696 -2.0333277 -2.1032246 | H -0.4791538 2.9938523 0.9949350   |
| H -0.1576429 -1.3235053 2.5813457  | C 0.0291517 -0.4845319 -3.5313388  | H -0.2494842 2.5903962 -1.6734171  |
| H -0.4582646 0.4075575 2.2945128   | H 1.1222231 1.6793032 -2.0235024   | H -0.5812396 0.9470517 -2.2898027  |
| H -1.7923192 -0.7282413 2.2432772  | H 2.4989941 0.7692018 -1.4263447   | H -1.9042361 1.9466417 -1.7187163  |
| H -2.9323154 -0.3843704 -1.2136018 | H 0.0476768 -1.1845596 -4.3788896  | H -3.2763223 0.3351879 1.0616540   |
| H 2.1641372 -0.6142369 1.8459236   | C 1.4538362 -0.1993293 -3.0487267  | H 1.8934586 1.4889753 -1.3471404   |
| H 1.9670724 -2.2259785 1.1691218   | H -0.4219048 0.4438053 -3.9095037  | H 1.6314394 2.5694511 0.0106584    |
| C 3.4212431 -1.0083183 0.1151681   | H 2.0392946 0.2770474 -3.8489627   | C 3.1940249 1.1081837 0.3368697    |
| H 1.8692770 1.5265133 1.5828697    | H 1.9500888 -1.1560086 -2.8256664  | H 1.6370940 -0.5707500 -2.1268123  |
| H 1.5339409 2.7915049 0.3944795    | H -1.9316411 1.6849862 -0.5969301  | H 1.3319341 -2.2536561 -1.6782058  |
| H 0.1850188 1.9981257 1.2042599    | H -1.0289097 1.8421938 -2.1135649  | H -0.0439068 -1.1552696 -1.9422386 |
| H 2.2665800 0.2944681 -2.1292200   | H -2.5319097 0.9125085 -2.0618579  | H 2.2548378 -1.1386538 1.6723512   |
| H 2.5537113 1.9417049 -1.5619396   | H 0.8860565 2.7853064 0.1210760    | H 2.5403177 -2.3084833 0.3838655   |
| H 4.2828227 -1.2853723 0.7392782   | H -0.6673800 2.3444100 0.8614797   | H 4.0017317 1.7321179 -0.0732717   |
| H 3.4079850 -1.7165139 -0.7275082  | H 0.7716430 2.5044266 1.8609583    | H 3.1815327 1.2879853 1.4230854    |
| C 3.6145485 0.4117162 -0.4398847   | H 2.9397514 0.9391819 0.6933737    | C 3.4856702 -0.3735158 0.0853795   |
| H 4.5075855 0.4375335 -1.0804524   | H 2.2258588 0.7536555 2.3079846    | H 4.4192334 -0.6688375 0.5854997   |
| H 3.8155983 1.1008569 0.3916390    | H 2.3691163 -0.6612000 1.2619872   | H 3.6454759 -0.5381315 -0.9891498  |
